# Supplementary material
Source: PubMed Central journal article supplement (PMC10090658)
Supplement: mmc1.pdf [file mmc1.pdf]

# The rising burden of noncommunicable diseases in the Americas and the impact of population aging: A secondary analysis of available data

Hambleton IR, PhD<sup>1</sup>  
Caixeta, R<sup>2</sup>  
Jeyaseelan SM, PhD<sup>3</sup>  
Luciani, S<sup>2</sup>  
Hennis AJ<sup>2</sup>

SUPPLEMENTARY INFORMATION  
VERSION 1.1 (created Jan 20, 2023)

## Table of Contents

|                                                                                                                                                                                                              |    |
|--------------------------------------------------------------------------------------------------------------------------------------------------------------------------------------------------------------|----|
| PART ONE. DEMOGRAPHIC INDICATORS FOR WOMEN AND MEN SEPARATELY .....                                                                                                                                          | 4  |
| TABLE S1. Population size and proportion of women aged 70 and older among 33 countries of the Americas in 2000 and in 2020....                                                                               | 4  |
| TABLE S2. Population size and proportion of men aged 70 and older among 33 countries of the Americas in 2000 and in 2020 .....                                                                               | 5  |
| PART TWO. DECOMPOSITION OF REASONS FOR DEATHS/DALYs BETWEEN 2000 and 2019, FOR WOMEN AND MEN SEPARATELY .....                                                                                                | 6  |
| FIGURE S3. Contribution of changes in population growth, population aging, and rates of age-specific mortality to the percentage change in mortality due to NCDs, 2000 to 2019. Women and men combined. .... | 6  |
| TABLE S3. Contribution of changes in population growth, population aging, and rates of age-specific mortality to the percentage change in mortality due to NCDs, 2000 to 2019. Women and Men combined. ....  | 7  |
| FIGURE S4. Contribution of changes in population growth, population aging, and rates of age-specific morbidity to the percentage change in DALYs due to NCDs, 2000 to 2019. Women and men combined. ....     | 8  |
| TABLE S4. Contribution of changes in population growth, population aging, and rates of age-specific morbidity to the percentage change in DALYs due to NCDs, 2000 to 2019. Women and Men combined. ....      | 9  |
| FIGURE S5. Contribution of changes in population growth, population aging, and rates of age-specific mortality to the percentage change in mortality due to NCDs, 2000 to 2019. Women only. ....             | 10 |
| TABLE S5. Contribution of changes in population growth, population aging, and rates of age-specific mortality to the percentage change in mortality due to NCDs, 2000 to 2019. Women only. ....              | 11 |
| FIGURE S6. Contribution of changes in population growth, population aging, and rates of age-specific DALYs to the percentage change in DALYs due to NCDs, 2000 to 2019. Women only. ....                     | 12 |
| TABLE S6. Contribution of changes in population growth, population aging, and rates of age-specific morbidity to the percentage change in DALYs due to NCDs, 2000 to 2019. Women only. ....                  | 13 |
| FIGURE S7. Contribution of changes in population growth, population aging, and rates of age-specific mortality to the percentage change in mortality due to NCDs, 2000 to 2019. Men only. ....               | 14 |
| TABLE S7. Contribution of changes in population growth, population aging, and rates of age-specific mortality to the percentage change in mortality due to NCDs, 2000 to 2019. Men only. ....                | 15 |
| FIGURE S8. Contribution of changes in population growth, population aging, and rates of age-specific DALYs to the percentage change in DALYs due to NCDs, 2000 to 2019. Men only. ....                       | 16 |
| TABLE S8. Contribution of changes in population growth, population aging, and rates of age-specific morbidity to the percentage change in DALYs due to NCDs, 2000 to 2019. Men only. ....                    | 17 |
| PART THREE. DECOMPOSITION OF REASONS FOR DEATHS/DALYs BETWEEN 2000 and 2019 INCORPORATING UNCERTAINTY, FOR WOMEN AND MEN SEPARATELY .....                                                                    | 18 |

|                                                                                                                                                                                                                                                                                                                                                                     |    |
|---------------------------------------------------------------------------------------------------------------------------------------------------------------------------------------------------------------------------------------------------------------------------------------------------------------------------------------------------------------------|----|
| FIGURE S9a. Contribution of changes in population growth, population aging, and rates of age-specific morbidity to the percentage change in deaths due to NCDs, 2000 to 2019, with associated 95% Uncertainty Intervals for overall percentage change in deaths. Women and Men combined. Overall change in deaths based on point estimate.....                      | 18 |
| FIGURE S9b. Contribution of changes in population growth, population aging, and rates of age-specific morbidity to the percentage change in deaths due to NCDs, 2000 to 2019, with associated 95% Uncertainty Intervals for overall percentage change in deaths. Women and Men combined. Overall change in deaths based on lower bound of uncertainty interval..... | 19 |
| FIGURE S9d. Contribution of changes in population growth, population aging, and rates of age-specific morbidity to the percentage change in DALYs due to NCDs, 2000 to 2019, with associated 95% Uncertainty Intervals for overall percentage change in DALYs. Women and Men combined. Overall change in DALYs based on point estimate.....                         | 21 |
| FIGURE S9e. Contribution of changes in population growth, population aging, and rates of age-specific morbidity to the percentage change in DALYs due to NCDs, 2000 to 2019, with associated 95% Uncertainty Intervals for overall percentage change in DALYs. Women and Men combined. Overall change in DALYs based on lower bound of uncertainty interval.....    | 22 |
| FIGURE S9f. Contribution of changes in population growth, population aging, and rates of age-specific morbidity to the percentage change in DALYs due to NCDs, 2000 to 2019, with associated 95% Uncertainty Intervals for overall percentage change in DALYs. Women and Men combined. Overall change in DALYs based on upper bound of uncertainty interval. ....   | 23 |
| TABLE S9. Deaths/DALYs in 2000 and in 2019, and percentage change in deaths/DALYs between 2000 and 2019, with associated 95% Uncertainty Intervals. Women and Men combined. ....                                                                                                                                                                                    | 24 |
| FIGURE S10a. Contribution of changes in population growth, population aging, and rates of age-specific morbidity to the percentage change in deaths due to NCDs, 2000 to 2019, with associated 95% Uncertainty Intervals for overall percentage change in deaths. Women only. Overall change in deaths based on point estimate. ....                                | 26 |
| FIGURE S10b. Contribution of changes in population growth, population aging, and rates of age-specific morbidity to the percentage change in deaths due to NCDs, 2000 to 2019, with associated 95% Uncertainty Intervals for overall percentage change in deaths. Women only. Overall change in deaths based on lower bound of uncertainty interval. ....           | 27 |
| FIGURE S10d. Contribution of changes in population growth, population aging, and rates of age-specific morbidity to the percentage change in DALYs due to NCDs, 2000 to 2019, with associated 95% Uncertainty Intervals for overall percentage change in DALYs. Women only. Overall change in DALYs based on point estimate.....                                    | 29 |
| FIGURE S10e. Contribution of changes in population growth, population aging, and rates of age-specific morbidity to the percentage change in DALYs due to NCDs, 2000 to 2019, with associated 95% Uncertainty Intervals for overall percentage change in DALYs. Women only. Overall change in DALYs based on lower bound of uncertainty interval. ....              | 30 |
| FIGURE S10f. Contribution of changes in population growth, population aging, and rates of age-specific morbidity to the percentage change in DALYs due to NCDs, 2000 to 2019, with associated 95% Uncertainty Intervals for overall percentage change in DALYs. Women only. Overall change in DALYs based on upper bound of uncertainty interval.....               | 31 |
| TABLE S10. Deaths/DALYs in 2000 and in 2019, and percentage change in deaths/DALYs between 2000 and 2019, with associated 95% Uncertainty Intervals. Women only.....                                                                                                                                                                                                | 32 |
| FIGURE S11a. Contribution of changes in population growth, population aging, and rates of age-specific morbidity to the percentage change in deaths due to NCDs, 2000 to 2019, with associated 95% Uncertainty Intervals for overall percentage change in deaths. Men only. Overall change in deaths based on point estimate.....                                   | 34 |
| FIGURE S11b. Contribution of changes in population growth, population aging, and rates of age-specific morbidity to the percentage change in deaths due to NCDs, 2000 to 2019, with associated 95% Uncertainty Intervals for overall percentage change in deaths. Men only. Overall change in deaths based on lower bound of uncertainty interval.....              | 35 |
| FIGURE S11d. Contribution of changes in population growth, population aging, and rates of age-specific morbidity to the percentage change in DALYs due to NCDs, 2000 to 2019, with associated 95% Uncertainty Intervals for overall percentage change in DALYs. Men only. Overall change in DALYs based on point estimate.....                                      | 37 |

FIGURE S11e. Contribution of changes in population growth, population aging, and rates of age-specific morbidity to the percentage change in DALYs due to NCDs, 2000 to 2019, with associated 95% Uncertainty Intervals for overall percentage change in DALYs. Men only. Overall change in DALYs based on lower bound of uncertainty interval..... 38

FIGURE S11f. Contribution of changes in population growth, population aging, and rates of age-specific morbidity to the percentage change in DALYs due to NCDs, 2000 to 2019, with associated 95% Uncertainty Intervals for overall percentage change in DALYs. Men only. Overall change in DALYs based on upper bound of uncertainty interval..... 39

TABLE S11. Deaths/DALYs in 2000 and in 2019, and percentage change in deaths/DALYs between 2000 and 2019, with associated 95% Uncertainty Intervals. Men only. .... 40

**PART ONE. DEMOGRAPHIC INDICATORS FOR WOMEN AND MEN SEPARATELY**

TABLE S1. Population size and proportion of women aged 70 and older among 33 countries of the Americas in 2000 and in 2020

| Country             | Population in 2020 | Percent of population aged 70+ |      | Annual growth rate (2000 to 2020) |                    |
|---------------------|--------------------|--------------------------------|------|-----------------------------------|--------------------|
|                     |                    | 2000                           | 2020 | All ages                          | Older adults (70+) |
| AMERICAS            | 516,083,232        | 6.6                            | 8.7  | 1.03                              | 2.44               |
| NORTH AMERICA       | 186,226,624        | 10.7                           | 12.7 | 0.81                              | 1.67               |
| Canada              | 19,009,980         | 10.4                           | 13.6 | 1.04                              | 2.38               |
| United States       | 167,216,640        | 10.7                           | 12.6 | 0.78                              | 1.59               |
| CENTRAL AMERICA     | 25,757,460         | 3.0                            | 4.6  | 1.67                              | 3.71               |
| Belize              | 199,860            | 2.6                            | 3.1  | 2.44                              | 3.24               |
| Costa Rica          | 2,549,038          | 4.0                            | 7.4  | 1.28                              | 4.37               |
| El Salvador         | 3,449,777          | 3.6                            | 6.4  | 0.61                              | 3.42               |
| Guatemala           | 9,088,458          | 2.6                            | 3.5  | 2.13                              | 3.72               |
| Honduras            | 4,955,728          | 2.6                            | 3.5  | 2.03                              | 3.50               |
| Nicaragua           | 3,359,705          | 2.7                            | 3.9  | 1.36                              | 3.17               |
| Panama              | 2,154,888          | 3.8                            | 6.2  | 1.80                              | 4.23               |
| ANDEAN AREA         | 71,576,824         | 3.4                            | 5.9  | 1.22                              | 3.96               |
| Bolivia             | 5,815,010          | 3.7                            | 5.6  | 1.65                              | 3.76               |
| Colombia            | 25,898,320         | 3.6                            | 6.4  | 1.24                              | 4.11               |
| Ecuador             | 8,819,233          | 3.4                            | 5.3  | 1.67                              | 3.83               |
| Peru                | 16,593,240         | 3.4                            | 6.0  | 1.12                              | 4.00               |
| Venezuela           | 14,451,011         | 3.1                            | 5.6  | 0.91                              | 3.78               |
| SOUTHERN CONE       | 38,140,736         | 7.2                            | 9.0  | 1.02                              | 2.17               |
| Argentina           | 23,146,632         | 7.9                            | 9.2  | 0.99                              | 1.78               |
| Chile               | 9,690,540          | 5.9                            | 9.3  | 1.09                              | 3.36               |
| Paraguay            | 3,508,170          | 3.2                            | 4.6  | 1.46                              | 3.31               |
| Uruguay             | 1,795,391          | 10.8                           | 13.3 | 0.23                              | 1.27               |
| LATIN CARIBBEAN     | 16,908,932         | 4.6                            | 6.9  | 0.91                              | 2.93               |
| Cuba                | 5,703,148          | 7.4                            | 11.9 | 0.11                              | 2.52               |
| Dominican Rep       | 5,429,698          | 3.0                            | 5.2  | 1.25                              | 4.09               |
| Haiti               | 5,776,088          | 2.7                            | 3.5  | 1.48                              | 2.90               |
| NON-LATIN CARIBBEAN | 3,487,776          | 5.2                            | 6.6  | 0.59                              | 1.82               |
| Antigua & Barbuda   | 50,659             | 4.8                            | 6.1  | 1.14                              | 2.41               |
| Bahamas             | 202,155            | 4.0                            | 5.3  | 1.40                              | 2.86               |
| Barbados            | 148,287            | 10.1                           | 12.6 | 0.25                              | 1.33               |
| Grenada             | 55,853             | 6.5                            | 7.3  | 0.39                              | 0.99               |
| Guyana              | 391,010            | 2.8                            | 4.7  | 0.21                              | 2.80               |
| Jamaica             | 1,491,520          | 5.8                            | 6.2  | 0.56                              | 0.90               |
| Saint Lucia         | 93,207             | 5.5                            | 7.1  | 0.77                              | 2.05               |
| St Vincent & Gren   | 54,729             | 5.4                            | 6.7  | 0.11                              | 1.19               |
| Suriname            | 291,812            | 3.7                            | 5.4  | 1.12                              | 3.12               |
| Trinidad & Tobago   | 708,544            | 4.9                            | 8.1  | 0.54                              | 3.00               |
| Brazil              | 108,123,624        | 3.7                            | 7.0  | 1.02                              | 4.15               |
| Mexico              | 65,861,272         | 3.7                            | 5.3  | 1.34                              | 3.08               |

TABLE S2. Population size and proportion of men aged 70 and older among 33 countries of the Americas in 2000 and in 2020

| Country             | Population in 2020 | Percent of population aged 70+ |      | Annual growth rate (2000 to 2020) |                    |
|---------------------|--------------------|--------------------------------|------|-----------------------------------|--------------------|
|                     |                    | 2000                           | 2020 | All ages                          | Older adults (70+) |
| AMERICAS            | 501,912,736        | 4.6                            | 6.8  | 1.02                              | 2.93               |
| NORTH AMERICA       | 182,518,176        | 7.2                            | 10.0 | 0.85                              | 2.50               |
| Canada              | 18,732,176         | 7.2                            | 11.2 | 1.06                              | 3.25               |
| United States       | 163,786,016        | 7.2                            | 9.9  | 0.83                              | 2.41               |
| CENTRAL AMERICA     | 24,979,980         | 2.5                            | 3.7  | 1.65                              | 3.52               |
| Belize              | 197,761            | 2.4                            | 3.2  | 2.31                              | 3.76               |
| Costa Rica          | 2,545,076          | 3.2                            | 6.1  | 1.23                              | 4.55               |
| El Salvador         | 3,036,424          | 3.0                            | 5.1  | 0.34                              | 2.96               |
| Guatemala           | 8,827,109          | 2.3                            | 2.9  | 2.17                              | 3.30               |
| Honduras            | 4,948,880          | 2.1                            | 2.8  | 2.07                              | 3.50               |
| Nicaragua           | 3,264,849          | 2.0                            | 2.9  | 1.32                              | 3.13               |
| Panama              | 2,159,880          | 3.4                            | 5.2  | 1.73                              | 3.89               |
| ANDEAN AREA         | 70,029,944         | 2.7                            | 4.8  | 1.18                              | 4.03               |
| Bolivia             | 5,858,019          | 3.0                            | 4.6  | 1.62                              | 3.78               |
| Colombia            | 24,984,564         | 2.9                            | 5.1  | 1.26                              | 4.06               |
| Ecuador             | 8,823,827          | 2.9                            | 4.4  | 1.63                              | 3.77               |
| Peru                | 16,378,606         | 2.6                            | 5.2  | 1.08                              | 4.56               |
| Venezuela           | 13,984,932         | 2.4                            | 4.3  | 0.71                              | 3.57               |
| SOUTHERN CONE       | 36,777,512         | 4.7                            | 6.2  | 1.06                              | 2.39               |
| Argentina           | 22,049,148         | 5.1                            | 6.1  | 1.04                              | 1.92               |
| Chile               | 9,425,669          | 4.0                            | 6.7  | 1.11                              | 3.70               |
| Paraguay            | 3,624,360          | 2.5                            | 3.9  | 1.47                              | 3.68               |
| Uruguay             | 1,678,336          | 7.0                            | 8.1  | 0.22                              | 0.96               |
| LATIN CARIBBEAN     | 16,668,119         | 4.0                            | 5.7  | 0.89                              | 2.61               |
| Cuba                | 5,623,468          | 6.3                            | 9.8  | 0.07                              | 2.31               |
| Dominican Rep       | 5,418,206          | 2.9                            | 4.4  | 1.22                              | 3.41               |
| Haiti               | 5,626,445          | 2.2                            | 2.7  | 1.50                              | 2.58               |
| NON-LATIN CARIBBEAN | 3,431,711          | 4.2                            | 5.6  | 0.58                              | 2.02               |
| Antigua & Barbuda   | 47,269             | 4.3                            | 5.6  | 1.40                              | 2.67               |
| Bahamas             | 191,093            | 2.7                            | 4.1  | 1.37                              | 3.43               |
| Barbados            | 139,084            | 7.3                            | 10.3 | 0.32                              | 2.04               |
| Grenada             | 56,666             | 4.5                            | 5.4  | 0.51                              | 1.42               |
| Guyana              | 395,549            | 2.4                            | 3.9  | 0.31                              | 2.74               |
| Jamaica             | 1,469,641          | 5.1                            | 5.9  | 0.54                              | 1.19               |
| Saint Lucia         | 90,422             | 4.9                            | 6.8  | 0.81                              | 2.46               |
| St Vincent & Gren   | 56,218             | 3.9                            | 6.1  | 0.17                              | 2.43               |
| Suriname            | 294,822            | 3.1                            | 3.6  | 1.07                              | 1.90               |
| Trinidad & Tobago   | 690,947            | 3.5                            | 6.3  | 0.46                              | 3.46               |
| Brazil              | 104,435,784        | 2.8                            | 5.2  | 0.94                              | 4.01               |
| Mexico              | 63,071,476         | 3.0                            | 4.4  | 1.31                              | 3.22               |

**PART TWO. DECOMPOSITION OF REASONS FOR DEATHS/DALYs BETWEEN 2000 and 2019, FOR WOMEN AND MEN SEPARATELY**

**FIGURE S3.** Contribution of changes in population growth, population aging, and rates of age-specific mortality to the percentage change in mortality due to NCDs, 2000 to 2019. Women and men combined.

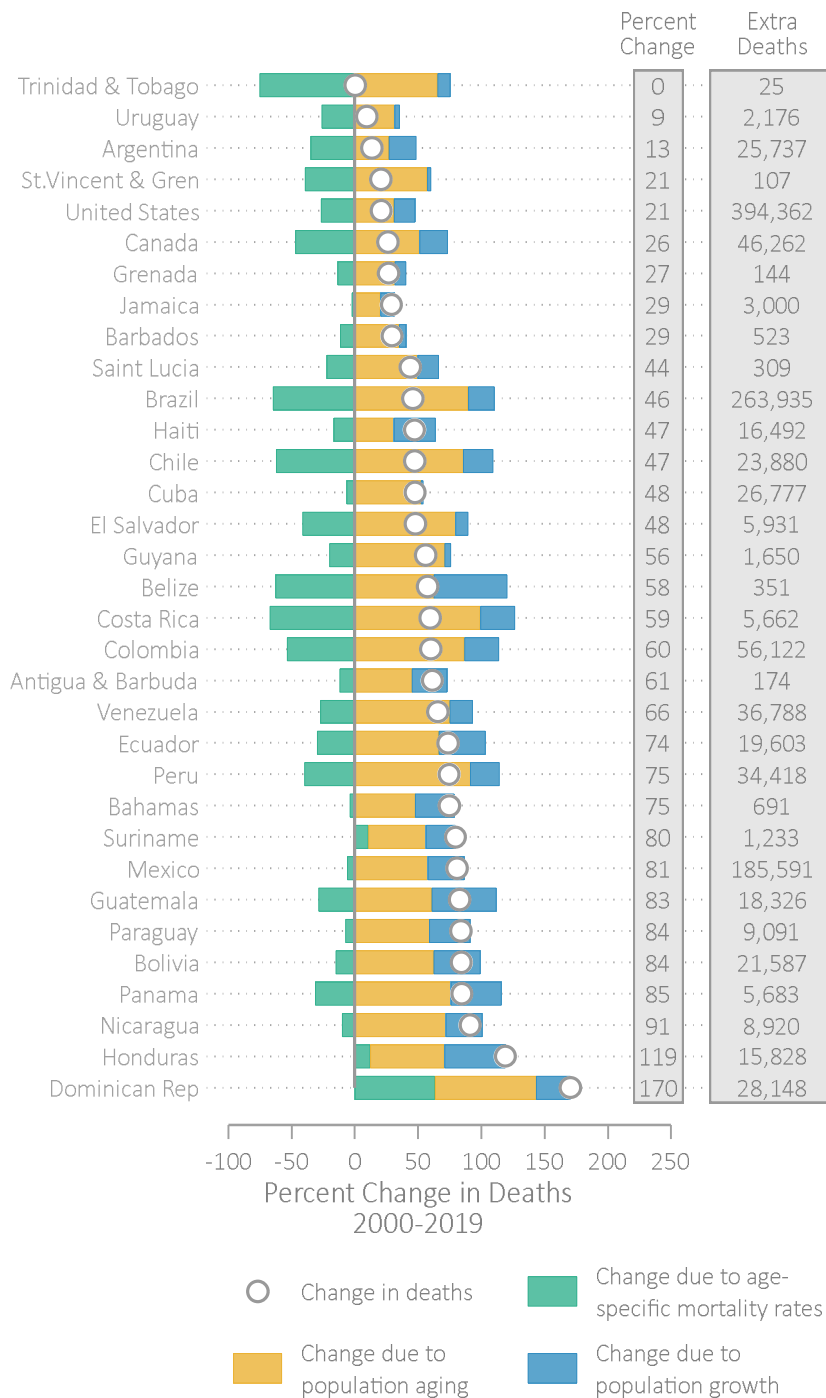

TABLE S3. Contribution of changes in population growth, population aging, and rates of age-specific mortality to the percentage change in mortality due to NCDs, 2000 to 2019. Women and Men combined.

| Country           | (1) Deaths (2000) | (2) Deaths (2019) | (3)       | (4)       | (5)   | (6)  | (7)  | (8)   |
|-------------------|-------------------|-------------------|-----------|-----------|-------|------|------|-------|
| Antigua & Barbuda | 285               | 460               | 364       | 493       | 61.3  | 27.8 | 45.4 | -11.9 |
| Argentina         | 191,142           | 216,880           | 232,147   | 283,691   | 13.5  | 21.5 | 27.0 | -35.0 |
| Bahamas           | 925               | 1,617             | 1,209     | 1,652     | 74.7  | 30.7 | 47.9 | -3.8  |
| Barbados          | 1,785             | 2,309             | 1,887     | 2,512     | 29.3  | 5.7  | 35.0 | -11.4 |
| Belize            | 609               | 961               | 962       | 1,343     | 57.6  | 57.8 | 62.5 | -62.7 |
| Bolivia           | 25,649            | 47,236            | 35,079    | 51,082    | 84.2  | 36.8 | 62.4 | -15.0 |
| Brazil            | 574,993           | 838,929           | 694,272   | 1,210,335 | 45.9  | 20.7 | 89.8 | -64.6 |
| Canada            | 176,115           | 222,378           | 215,397   | 305,457   | 26.3  | 22.3 | 51.1 | -47.2 |
| Chile             | 50,561            | 74,442            | 62,457    | 105,846   | 47.2  | 23.5 | 85.8 | -62.1 |
| Colombia          | 93,466            | 149,588           | 118,724   | 199,751   | 60.0  | 27.0 | 86.7 | -53.7 |
| Costa Rica        | 9,516             | 15,179            | 12,123    | 21,553    | 59.5  | 27.4 | 99.1 | -67.0 |
| Cuba              | 56,256            | 83,033            | 57,303    | 86,749    | 47.6  | 1.9  | 52.3 | -6.6  |
| Dominican Rep     | 16,526            | 44,674            | 20,949    | 34,234    | 170.3 | 26.8 | 80.4 | 63.2  |
| Ecuador           | 26,597            | 46,201            | 36,439    | 54,128    | 73.7  | 37.0 | 66.5 | -29.8 |
| El Salvador       | 12,361            | 18,292            | 13,548    | 23,410    | 48.0  | 9.6  | 79.8 | -41.4 |
| Grenada           | 538               | 682               | 586       | 756       | 26.8  | 8.9  | 31.5 | -13.7 |
| Guatemala         | 22,099            | 40,426            | 33,349    | 46,787    | 82.9  | 50.9 | 60.8 | -28.8 |
| Guyana            | 2,950             | 4,601             | 3,092     | 5,190     | 55.9  | 4.8  | 71.1 | -20.0 |
| Haiti             | 34,953            | 51,445            | 46,513    | 57,309    | 47.2  | 33.1 | 30.9 | -16.8 |
| Honduras          | 13,302            | 29,131            | 19,720    | 27,529    | 119.0 | 48.2 | 58.7 | 12.0  |
| Jamaica           | 10,373            | 13,373            | 11,520    | 13,615    | 28.9  | 11.1 | 20.2 | -2.3  |
| Mexico            | 229,475           | 415,067           | 296,010   | 428,494   | 80.9  | 29.0 | 57.7 | -5.9  |
| Nicaragua         | 9,794             | 18,714            | 12,645    | 19,674    | 91.1  | 29.1 | 71.8 | -9.8  |
| Panama            | 6,725             | 12,409            | 9,424     | 14,527    | 84.5  | 40.1 | 75.9 | -31.5 |
| Paraguay          | 10,837            | 19,928            | 14,341    | 20,731    | 83.9  | 32.3 | 59.0 | -7.4  |
| Peru              | 46,180            | 80,598            | 56,739    | 98,949    | 74.5  | 22.9 | 91.4 | -39.7 |
| Saint Lucia       | 708               | 1,018             | 826       | 1,176     | 43.8  | 16.6 | 49.5 | -22.4 |
| St Vincent & Gren | 521               | 629               | 534       | 834       | 20.7  | 2.6  | 57.4 | -39.3 |
| Suriname          | 1,549             | 2,782             | 1,912     | 2,614     | 79.6  | 23.4 | 45.4 | 10.8  |
| Trinidad & Tobago | 6,651             | 6,677             | 7,322     | 11,672    | 0.4   | 10.1 | 65.4 | -75.1 |
| United States     | 1,885,073         | 2,279,436         | 2,201,943 | 2,783,532 | 20.9  | 16.8 | 30.9 | -26.7 |
| Uruguay           | 23,004            | 25,180            | 23,988    | 31,210    | 9.5   | 4.3  | 31.4 | -26.2 |
| Venezuela         | 56,143            | 92,931            | 66,176    | 108,330   | 65.5  | 17.9 | 75.1 | -27.4 |

(3) Expected deaths due to population growth alone (4) Expected deaths due to population aging (5) Percent change in deaths (2000 to 2019) (6) Percent change due to growth (7) Percent change due to aging (8) Percent change due to age-stratified rate change

FIGURE S4. Contribution of changes in population growth, population aging, and rates of age-specific morbidity to the percentage change in DALYs due to NCDs, 2000 to 2019. Women and men combined.

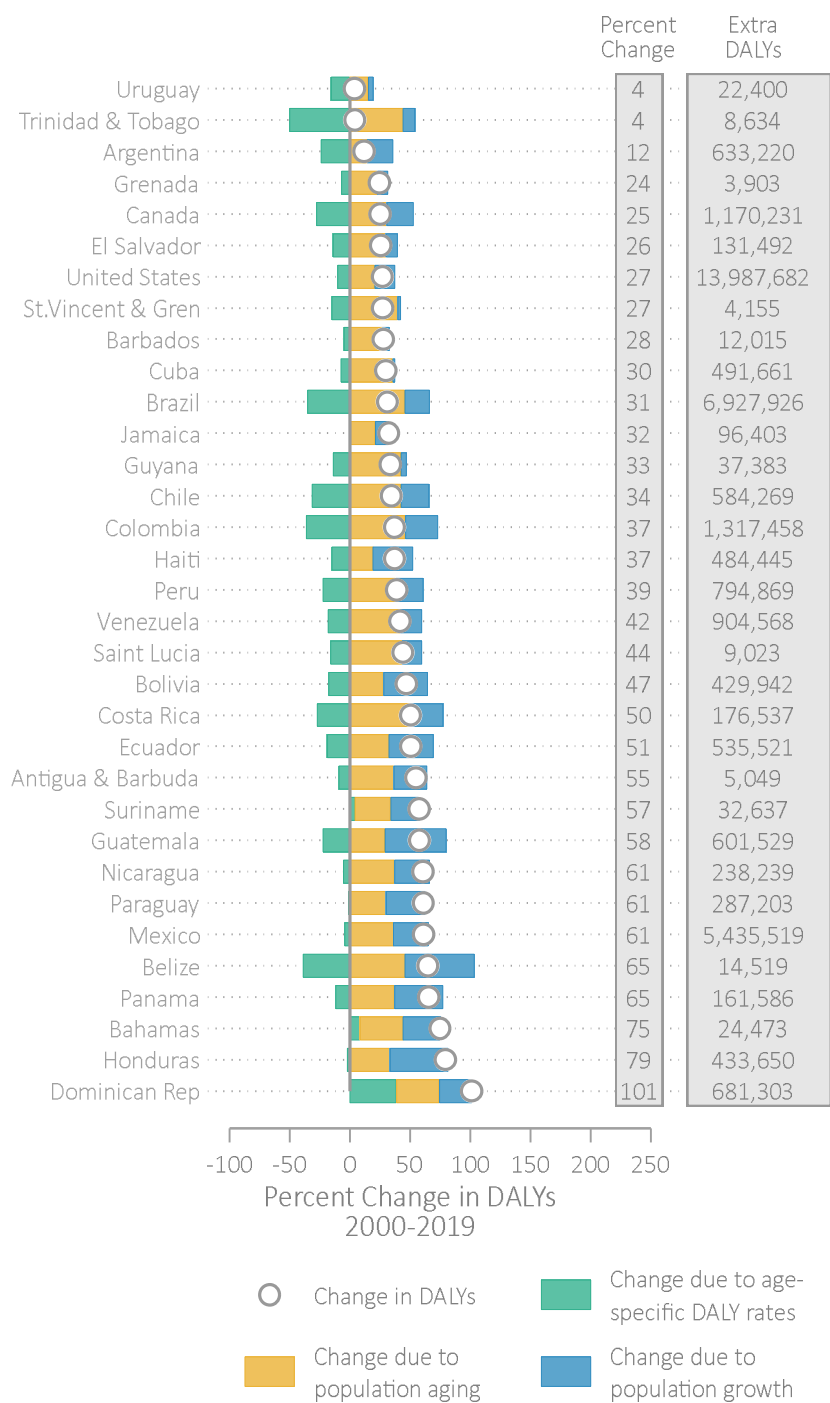



TABLE S4. Contribution of changes in population growth, population aging, and rates of age-specific morbidity to the percentage change in DALYs due to NCDs, 2000 to 2019. Women and Men combined.

| Country           | (1) DALYs (2000) | (2) DALYs (2019) | (3)       | (4)       | (5)   | (6)  | (7)  | (8)   |
|-------------------|------------------|------------------|-----------|-----------|-------|------|------|-------|
| Antigua & Barbuda | 9,189            | 14,238           | 11,741    | 15,089    | 55.0  | 27.8 | 36.4 | -9.3  |
| Argentina         | 5,394,689        | 6,027,909        | 6,552,010 | 7,324,111 | 11.7  | 21.5 | 14.3 | -24.0 |
| Bahamas           | 32,688           | 57,162           | 42,717    | 54,446    | 74.9  | 30.7 | 35.9 | 8.3   |
| Barbados          | 43,092           | 55,107           | 45,554    | 57,287    | 27.9  | 5.7  | 27.2 | -5.1  |
| Belize            | 22,442           | 36,961           | 35,422    | 45,712    | 64.7  | 57.8 | 45.9 | -39.0 |
| Bolivia           | 915,367          | 1,345,310        | 1,251,886 | 1,508,105 | 47.0  | 36.8 | 28.0 | -17.8 |
| Brazil            | 22,262,443       | 29,190,370       | 26880651  | 37042975  | 31.1  | 20.7 | 45.6 | -35.3 |
| Canada            | 4,644,639        | 5,814,871        | 5,680,614 | 7,102,123 | 25.2  | 22.3 | 30.6 | -27.7 |
| Chile             | 1,698,492        | 2,282,762        | 2,098,106 | 2,817,319 | 34.4  | 23.5 | 42.3 | -31.5 |
| Colombia          | 3,562,572        | 4,880,031        | 4,525,311 | 6,170,748 | 37.0  | 27.0 | 46.2 | -36.2 |
| Costa Rica        | 350,424          | 526,962          | 446,396   | 621,957   | 50.4  | 27.4 | 50.1 | -27.1 |
| Cuba              | 1,649,266        | 2,140,928        | 1,679,959 | 2,266,672 | 29.8  | 1.9  | 35.6 | -7.6  |
| Dominican Rep     | 673,528          | 1,354,832        | 853,821   | 1,096,047 | 101.2 | 26.8 | 36.0 | 38.4  |
| Ecuador           | 1,057,044        | 1,592,565        | 1,448,193 | 1,791,720 | 50.7  | 37.0 | 32.5 | -18.8 |
| El Salvador       | 513,299          | 644,792          | 562,609   | 717,090   | 25.6  | 9.6  | 30.1 | -14.1 |
| Grenada           | 15,957           | 19,861           | 17,379    | 20,969    | 24.5  | 8.9  | 22.5 | -6.9  |
| Guatemala         | 1,041,662        | 1,643,192        | 1,571,913 | 1,876,549 | 57.7  | 50.9 | 29.2 | -22.4 |
| Guyana            | 111,667          | 149,050          | 117,059   | 164,359   | 33.5  | 4.8  | 42.4 | -13.7 |
| Haiti             | 1,306,010        | 1,790,456        | 1,737,953 | 1,988,790 | 37.1  | 33.1 | 19.2 | -15.2 |
| Honduras          | 546,956          | 980,606          | 810,812   | 992,190   | 79.3  | 48.2 | 33.2 | -2.1  |
| Jamaica           | 298,319          | 394,722          | 331,309   | 394,133   | 32.3  | 11.1 | 21.1 | 0.2   |
| Mexico            | 8,895,571        | 14,331,091       | 11474812  | 14698634  | 61.1  | 29.0 | 36.2 | -4.1  |
| Nicaragua         | 391,884          | 630,124          | 506,001   | 651,014   | 60.8  | 29.1 | 37.0 | -5.3  |
| Panama            | 247,326          | 408,913          | 346,580   | 438,033   | 65.3  | 40.1 | 37.0 | -11.8 |
| Paraguay          | 470,717          | 757,921          | 622,940   | 764,389   | 61.0  | 32.3 | 30.0 | -1.4  |
| Peru              | 2,051,114        | 2,845,983        | 2,520,136 | 3,304,073 | 38.8  | 22.9 | 38.2 | -22.3 |
| Saint Lucia       | 20,510           | 29,533           | 23,920    | 32,822    | 44.0  | 16.6 | 43.4 | -16.0 |
| St Vincent & Gren | 15,336           | 19,491           | 15,736    | 21,815    | 27.1  | 2.6  | 39.6 | -15.2 |
| Suriname          | 56,846           | 89,483           | 70,174    | 87,009    | 57.4  | 23.4 | 29.6 | 4.4   |
| Trinidad & Tobago | 210,019          | 218,653          | 231,202   | 323,903   | 4.1   | 10.1 | 44.1 | -50.1 |
| United States     | 51,759,797       | 65,747,479       | 60460327  | 71165703  | 27.0  | 16.8 | 20.7 | -10.5 |
| Uruguay           | 572,110          | 594,510          | 596,581   | 684,625   | 3.9   | 4.3  | 15.4 | -15.8 |
| Venezuela         | 2,169,434        | 3,074,003        | 2,557,129 | 3,466,422 | 41.7  | 17.9 | 41.9 | -18.1 |

(3) Expected DALYs due to population growth alone (4) Expected DALYs due to population aging (5) Percent change in DALYs (2000 to 2019) (6) Percent change due to growth (7) Percent change due to aging (8) Percent change due to age-stratified rate change

FIGURE S5. Contribution of changes in population growth, population aging, and rates of age-specific mortality to the percentage change in mortality due to NCDs, 2000 to 2019. Women only.

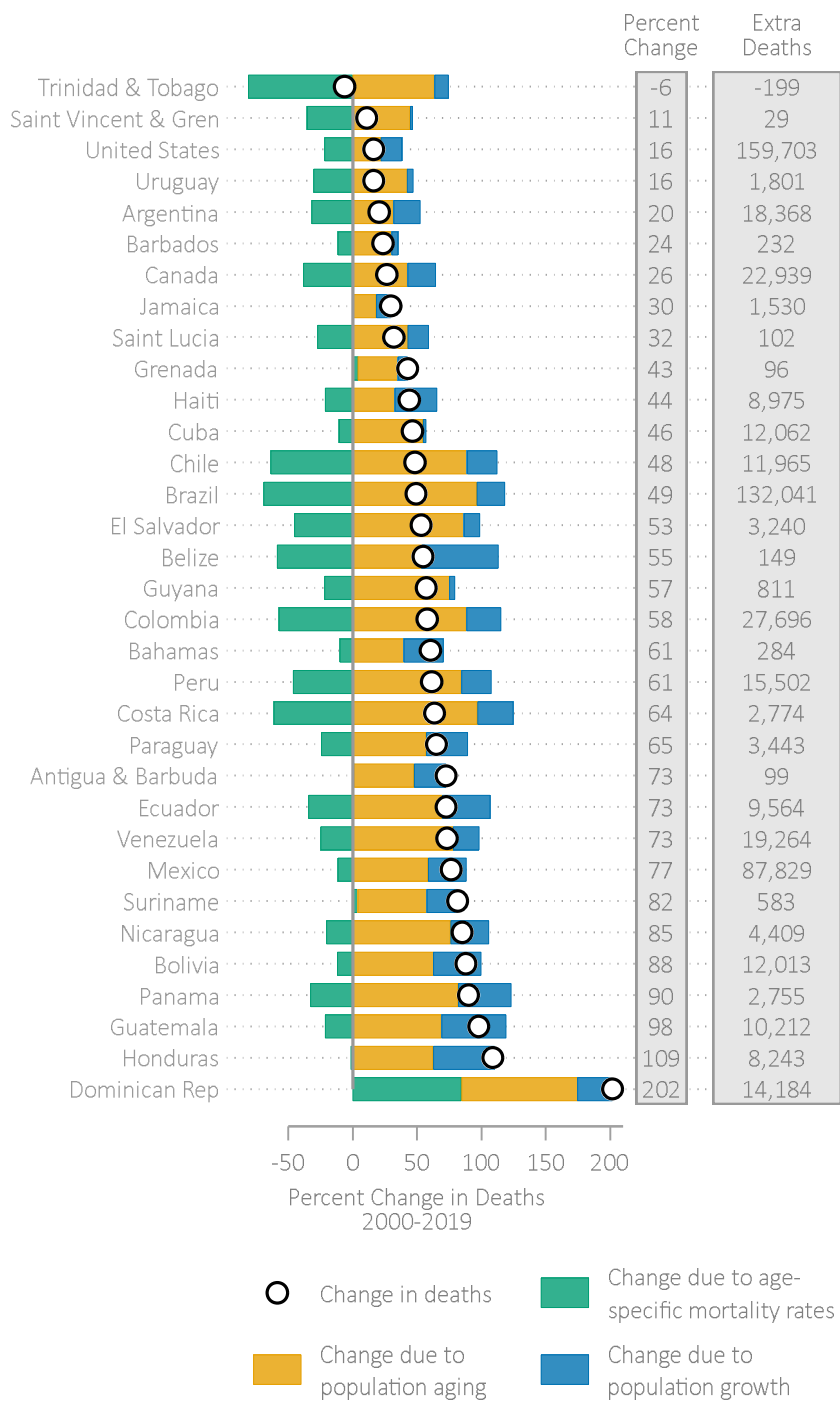

TABLE S5. Contribution of changes in population growth, population aging, and rates of age-specific mortality to the percentage change in mortality due to NCDs, 2000 to 2019. Women only.

| Country           | (1) Deaths (2000) | (2) Deaths (2019) | (3)       | (4)       | (5)   | (6)  | (7)  | (8)   |
|-------------------|-------------------|-------------------|-----------|-----------|-------|------|------|-------|
| Antigua & Barbuda | 138               | 237               | 172       | 236       | 72.6  | 24.7 | 46.7 | 1.1   |
| Argentina         | 89,650            | 108,018           | 108,373   | 136,730   | 20.5  | 20.9 | 31.6 | -32.0 |
| Bahamas           | 471               | 756               | 617       | 804       | 60.5  | 31.0 | 39.7 | -10.2 |
| Barbados          | 983               | 1,215             | 1,033     | 1,330     | 23.6  | 5.1  | 30.2 | -11.7 |
| Belize            | 273               | 422               | 436       | 582       | 54.7  | 59.7 | 53.6 | -58.6 |
| Bolivia           | 13,659            | 25,672            | 18,719    | 27,306    | 88.0  | 37.1 | 62.9 | -12.0 |
| Brazil            | 268,182           | 400,223           | 326,275   | 585,387   | 49.2  | 21.7 | 96.6 | -69.0 |
| Canada            | 86,691            | 109,631           | 105,851   | 142,828   | 26.5  | 22.1 | 42.7 | -38.3 |
| Chile             | 24,771            | 36,736            | 30,542    | 52,570    | 48.3  | 23.3 | 88.9 | -63.9 |
| Colombia          | 47,912            | 75,608            | 60,774    | 103,146   | 57.8  | 26.8 | 88.4 | -57.5 |
| Costa Rica        | 4,368             | 7,142             | 5,588     | 9,824     | 63.5  | 27.9 | 97.0 | -61.4 |
| Cuba              | 26,031            | 38,093            | 26,620    | 40,890    | 46.3  | 2.3  | 54.8 | -10.7 |
| Dominican Rep     | 7,024             | 21,208            | 8,928     | 15,264    | 201.9 | 27.1 | 90.2 | 84.6  |
| Ecuador           | 13,159            | 22,723            | 18,091    | 27,234    | 72.7  | 37.5 | 69.5 | -34.3 |
| El Salvador       | 6,084             | 9,324             | 6,838     | 12,097    | 53.3  | 12.4 | 86.4 | -45.6 |
| Grenada           | 226               | 323               | 243       | 314       | 42.7  | 7.5  | 31.1 | 4.1   |
| Guatemala         | 10,433            | 20,646            | 15,686    | 22,880    | 97.9  | 50.3 | 69.0 | -21.4 |
| Guyana            | 1,418             | 2,229             | 1,474     | 2,542     | 57.2  | 4.0  | 75.3 | -22.1 |
| Haiti             | 20,424            | 29,399            | 27,123    | 33,783    | 43.9  | 32.8 | 32.6 | -21.5 |
| Honduras          | 7,572             | 15,816            | 11,174    | 15,923    | 108.9 | 47.6 | 62.7 | -1.4  |
| Jamaica           | 5,162             | 6,693             | 5,743     | 6,662     | 29.7  | 11.3 | 17.8 | 0.6   |
| Mexico            | 114,779           | 202,609           | 148,592   | 216,016   | 76.5  | 29.5 | 58.7 | -11.7 |
| Nicaragua         | 5,183             | 9,593             | 6,715     | 10,659    | 85.1  | 29.6 | 76.1 | -20.6 |
| Panama            | 3,061             | 5,817             | 4,317     | 6,831     | 90.0  | 41.0 | 82.1 | -33.1 |
| Paraguay          | 5,290             | 8,733             | 6,988     | 10,014    | 65.1  | 32.1 | 57.2 | -24.2 |
| Peru              | 25,218            | 40,720            | 31,096    | 52,412    | 61.5  | 23.3 | 84.5 | -46.4 |
| Saint Lucia       | 322               | 425               | 375       | 513       | 31.9  | 16.2 | 42.9 | -27.2 |
| St Vincent & Gren | 273               | 302               | 278       | 399       | 10.9  | 1.9  | 44.6 | -35.6 |
| Suriname          | 716               | 1,299             | 888       | 1,272     | 81.6  | 24.0 | 53.7 | 3.8   |
| Trinidad & Tobago | 3,170             | 2,970             | 3,516     | 5,537     | -6.3  | 10.9 | 63.7 | -81.0 |
| United States     | 980,819           | 1,140,522         | 1,140,614 | 1,356,834 | 16.3  | 16.3 | 22.0 | -22.1 |
| Uruguay           | 11,033            | 12,834            | 11,527    | 16,214    | 16.3  | 4.5  | 42.5 | -30.6 |
| Venezuela         | 26,321            | 45,586            | 31,601    | 52,164    | 73.2  | 20.1 | 78.1 | -25.0 |

(3) Expected deaths due to population growth alone (4) Expected deaths due to population aging (5) Percent change in deaths (2000 to 2019) (6) Percent change due to growth (7) Percent change due to aging (8) Percent change due to age-stratified rate change

FIGURE S6. Contribution of changes in population growth, population aging, and rates of age-specific DALYs to the percentage change in DALYs due to NCDs, 2000 to 2019. Women only.

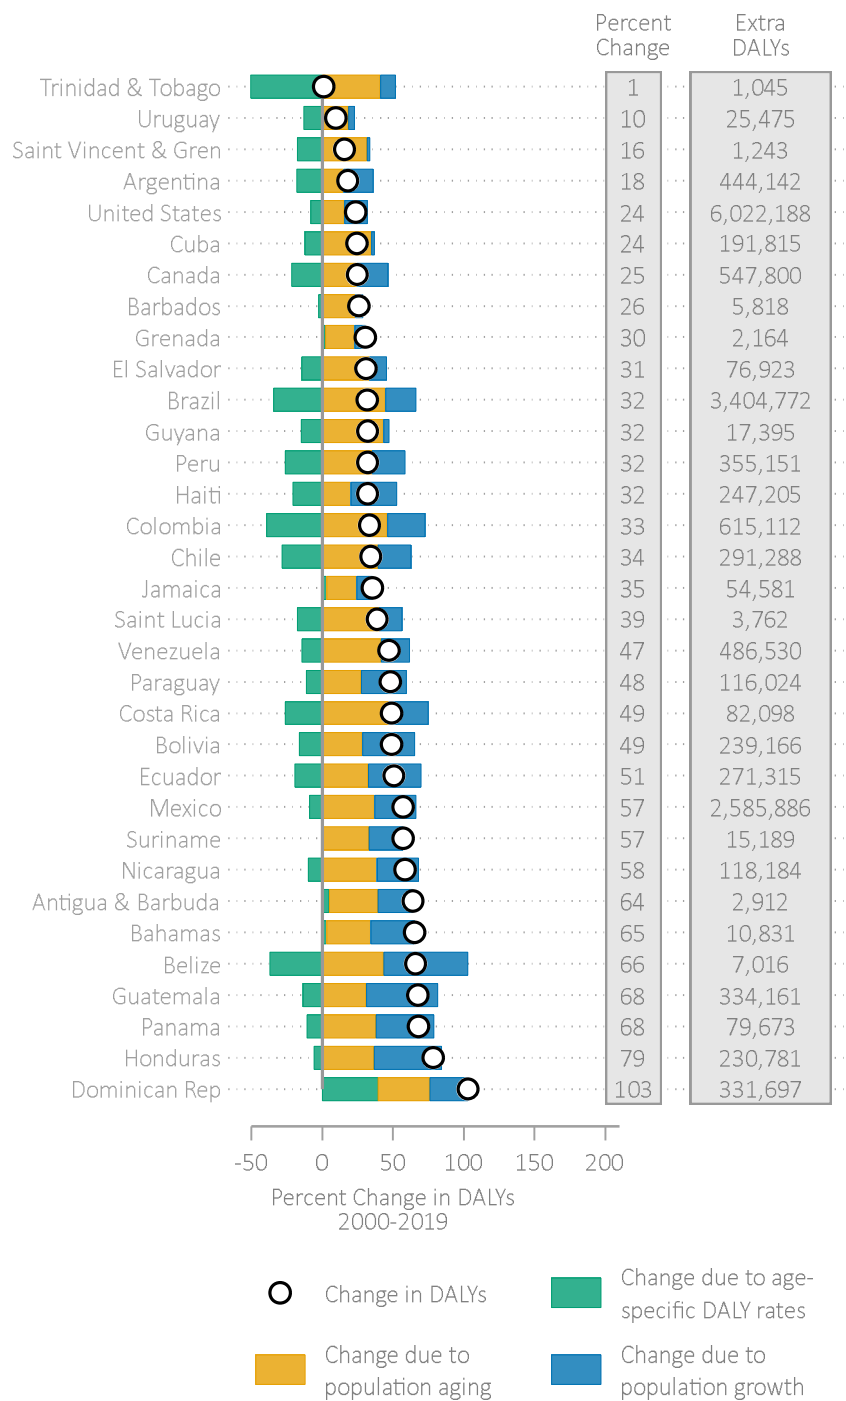

TABLE S6. Contribution of changes in population growth, population aging, and rates of age-specific morbidity to the percentage change in DALYs due to NCDs, 2000 to 2019. Women only.

| Country           | (1) DALYs (2000) | (2) DALYs (2019) | (3)        | (4)        | (5)   | (6)  | (7)  | (8)   |
|-------------------|------------------|------------------|------------|------------|-------|------|------|-------|
| Antigua & Barbuda | 4,544            | 7,456            | 5,667      | 7,234      | 64.1  | 24.7 | 34.5 | 4.9   |
| Argentina         | 2,456,069        | 2,900,212        | 2,969,024  | 3,344,054  | 18.1  | 20.9 | 15.3 | -18.1 |
| Bahamas           | 16,618           | 27,450           | 21,770     | 26,970     | 65.2  | 31.0 | 31.3 | 2.9   |
| Barbados          | 22,544           | 28,362           | 23,687     | 28,988     | 25.8  | 5.1  | 23.5 | -2.8  |
| Belize            | 10,641           | 17,658           | 16,991     | 21,605     | 65.9  | 59.7 | 43.4 | -37.1 |
| Bolivia           | 488,598          | 727,765          | 669,632    | 807,887    | 48.9  | 37.1 | 28.3 | -16.4 |
| Brazil            | 10,682,686       | 14,087,458       | 12,996,756 | 17,776,957 | 31.9  | 21.7 | 44.7 | -34.5 |
| Canada            | 2,213,228        | 2,761,028        | 2,702,361  | 3,243,495  | 24.8  | 22.1 | 24.4 | -21.8 |
| Chile             | 849,167          | 1,140,456        | 1,047,027  | 1,382,406  | 34.3  | 23.3 | 39.5 | -28.5 |
| Colombia          | 1,847,181        | 2,462,293        | 2,343,074  | 3,192,356  | 33.3  | 26.8 | 46.0 | -39.5 |
| Costa Rica        | 167,825          | 249,924          | 214,702    | 293,731    | 48.9  | 27.9 | 47.1 | -26.1 |
| Cuba              | 784,282          | 976,098          | 802,026    | 1,073,701  | 24.5  | 2.3  | 34.6 | -12.4 |
| Dominican Rep     | 321,822          | 653,520          | 409,087    | 526,444    | 103.1 | 27.1 | 36.5 | 39.5  |
| Ecuador           | 536,179          | 807,494          | 737,137    | 911,289    | 50.6  | 37.5 | 32.5 | -19.4 |
| El Salvador       | 247,904          | 324,828          | 278,648    | 361,183    | 31.0  | 12.4 | 33.3 | -14.7 |
| Grenada           | 7,120            | 9,285            | 7,655      | 9,123      | 30.4  | 7.5  | 20.6 | 2.3   |
| Guatemala         | 493,738          | 827,900          | 742,314    | 896,370    | 67.7  | 50.3 | 31.2 | -13.9 |
| Guyana            | 54,298           | 71,694           | 56,454     | 79,900     | 32.0  | 4.0  | 43.2 | -15.1 |
| Haiti             | 771,243          | 1,018,449        | 1,024,218  | 1,178,980  | 32.1  | 32.8 | 20.1 | -20.8 |
| Honduras          | 293,938          | 524,720          | 433,757    | 541,614    | 78.5  | 47.6 | 36.7 | -5.7  |
| Jamaica           | 153,786          | 208,368          | 171,101    | 203,798    | 35.5  | 11.3 | 21.3 | 3.0   |
| Mexico            | 4,529,625        | 7,115,511        | 5,864,018  | 7,534,753  | 57.1  | 29.5 | 36.9 | -9.3  |
| Nicaragua         | 202,100          | 320,284          | 261,856    | 340,252    | 58.5  | 29.6 | 38.8 | -9.9  |
| Panama            | 117,126          | 196,799          | 165,175    | 209,573    | 68.0  | 41.0 | 37.9 | -10.9 |
| Paraguay          | 240,579          | 356,603          | 317,790    | 384,128    | 48.2  | 32.1 | 27.6 | -11.4 |
| Peru              | 1,108,117        | 1,463,268        | 1,366,419  | 1,757,404  | 32.1  | 23.3 | 35.3 | -26.5 |
| Saint Lucia       | 9,701            | 13,464           | 11,270     | 15,187     | 38.8  | 16.2 | 40.4 | -17.8 |
| St Vincent & Gren | 7,929            | 9,172            | 8,078      | 10,593     | 15.7  | 1.9  | 31.7 | -17.9 |
| Suriname          | 26,606           | 41,796           | 33,005     | 41,648     | 57.1  | 24.0 | 32.5 | 0.6   |
| Trinidad & Tobago | 100,624          | 101,669          | 111,624    | 152,808    | 1.0   | 10.9 | 40.9 | -50.8 |
| United States     | 25,497,841       | 31,520,030       | 29,651,948 | 33,654,288 | 23.6  | 16.3 | 15.7 | -8.4  |
| Uruguay           | 262,358          | 287,834          | 274,114    | 322,569    | 9.7   | 4.5  | 18.5 | -13.2 |
| Venezuela         | 1,033,451        | 1,519,982        | 1,240,758  | 1,670,358  | 47.1  | 20.1 | 41.6 | -14.6 |

(3) Expected DALYs due to population growth alone (4) Expected DALYs due to population aging (5) Percent change in DALYs (2000 to 2019) (6) Percent change due to growth (7) Percent change due to aging (8) Percent change due to age-stratified rate change

FIGURE S7. Contribution of changes in population growth, population aging, and rates of age-specific mortality to the percentage change in mortality due to NCDs, 2000 to 2019. Men only.

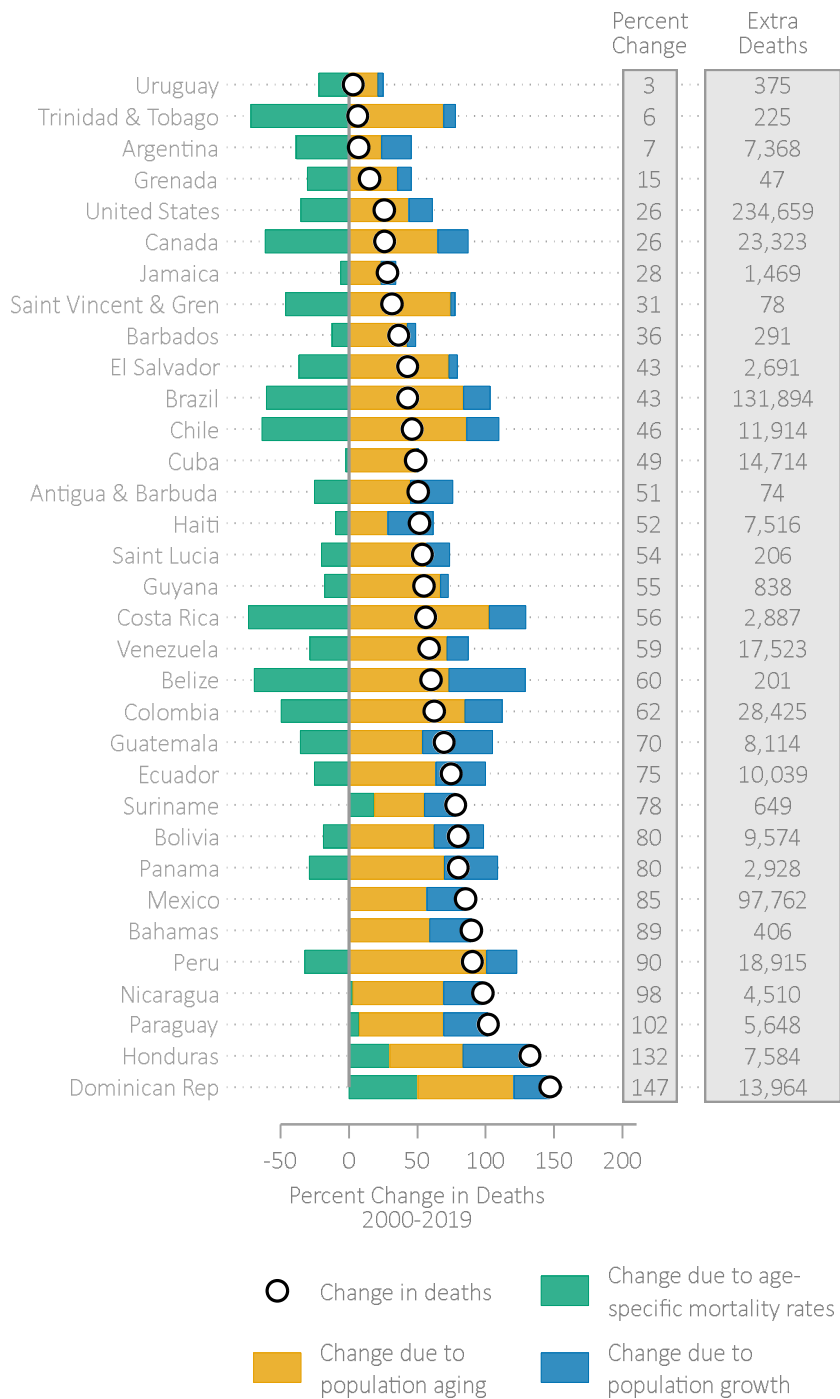

TABLE S7. Contribution of changes in population growth, population aging, and rates of age-specific mortality to the percentage change in mortality due to NCDs, 2000 to 2019. Men only.

| Country           | (1) Deaths (2000) | (2) Deaths (2019) | (3)       | (4)       | (5)   | (6)  | (7)   | (8)   |
|-------------------|-------------------|-------------------|-----------|-----------|-------|------|-------|-------|
| Antigua & Barbuda | 147               | 222               | 193       | 259       | 50.7  | 31.2 | 44.7  | -25.2 |
| Argentina         | 101,492           | 108,861           | 123,876   | 147,938   | 7.3   | 22.1 | 23.7  | -38.5 |
| Bahamas           | 455               | 861               | 592       | 858       | 89.4  | 30.3 | 58.4  | 0.7   |
| Barbados          | 802               | 1,093             | 853       | 1,193     | 36.4  | 6.4  | 42.4  | -12.4 |
| Belize            | 337               | 539               | 525       | 771       | 60.0  | 56.0 | 73.1  | -69.1 |
| Bolivia           | 11,991            | 21,565            | 16,364    | 23,802    | 79.8  | 36.5 | 62.0  | -18.7 |
| Brazil            | 306,811           | 438,705           | 367,590   | 623,771   | 43.0  | 19.8 | 83.5  | -60.3 |
| Canada            | 89,424            | 112,747           | 109,556   | 167,566   | 26.1  | 22.5 | 64.9  | -61.3 |
| Chile             | 25,790            | 37,705            | 31,919    | 54,116    | 46.2  | 23.8 | 86.1  | -63.6 |
| Colombia          | 45,555            | 73,981            | 57,950    | 96,573    | 62.4  | 27.2 | 84.8  | -49.6 |
| Costa Rica        | 5,149             | 8,036             | 6,531     | 11,811    | 56.1  | 26.8 | 102.5 | -73.3 |
| Cuba              | 30,225            | 44,940            | 30,665    | 45,608    | 48.7  | 1.5  | 49.4  | -2.2  |
| Dominican Rep     | 9,502             | 23,466            | 12,013    | 18,678    | 147.0 | 26.4 | 70.2  | 50.4  |
| Ecuador           | 13,438            | 23,478            | 18,348    | 26,883    | 74.7  | 36.5 | 63.5  | -25.3 |
| El Salvador       | 6,277             | 8,968             | 6,691     | 11,270    | 42.9  | 6.6  | 73.0  | -36.7 |
| Grenada           | 312               | 359               | 344       | 454       | 15.2  | 10.3 | 35.3  | -30.5 |
| Guatemala         | 11,666            | 19,780            | 17,672    | 23,930    | 69.6  | 51.5 | 53.6  | -35.6 |
| Guyana            | 1,532             | 2,371             | 1,619     | 2,645     | 54.8  | 5.7  | 67.0  | -17.9 |
| Haiti             | 14,529            | 22,046            | 19,375    | 23,490    | 51.7  | 33.4 | 28.3  | -9.9  |
| Honduras          | 5,731             | 13,315            | 8,534     | 11,607    | 132.3 | 48.9 | 53.6  | 29.8  |
| Jamaica           | 5,211             | 6,681             | 5,777     | 7,001     | 28.2  | 10.9 | 23.5  | -6.1  |
| Mexico            | 114,696           | 212,458           | 147,399   | 212,723   | 85.2  | 28.5 | 57.0  | -0.2  |
| Nicaragua         | 4,611             | 9,121             | 5,932     | 8,992     | 97.8  | 28.7 | 66.4  | 2.8   |
| Panama            | 3,664             | 6,592             | 5,102     | 7,650     | 79.9  | 39.3 | 69.5  | -28.9 |
| Paraguay          | 5,546             | 11,195            | 7,353     | 10,784    | 101.8 | 32.6 | 61.8  | 7.4   |
| Peru              | 20,962            | 39,877            | 25,661    | 46,689    | 90.2  | 22.4 | 100.3 | -32.5 |
| Saint Lucia       | 386               | 593               | 451       | 670       | 53.7  | 17.1 | 56.6  | -20.1 |
| St Vincent & Gren | 248               | 326               | 256       | 441       | 31.5  | 3.3  | 74.4  | -46.2 |
| Suriname          | 833               | 1,483             | 1,023     | 1,328     | 78.0  | 22.9 | 36.6  | 18.5  |
| Trinidad & Tobago | 3,481             | 3,706             | 3,802     | 6,203     | 6.5   | 9.2  | 69.0  | -71.7 |
| United States     | 904,254           | 1,138,914         | 1,061,075 | 1,457,719 | 26.0  | 17.3 | 43.9  | -35.3 |
| Uruguay           | 11,971            | 12,346            | 12,457    | 14,991    | 3.1   | 4.1  | 21.2  | -22.1 |
| Venezuela         | 29,821            | 47,345            | 34,503    | 55,896    | 58.8  | 15.7 | 71.7  | -28.7 |

(3) Expected deaths due to population growth alone (4) Expected deaths due to population aging (5) Percent change in deaths (2000 to 2019) (6) Percent change due to growth (7) Percent change due to aging (8) Percent change due to age-stratified rate change

FIGURE S8. Contribution of changes in population growth, population aging, and rates of age-specific DALYs to the percentage change in DALYs due to NCDs, 2000 to 2019. Men only.

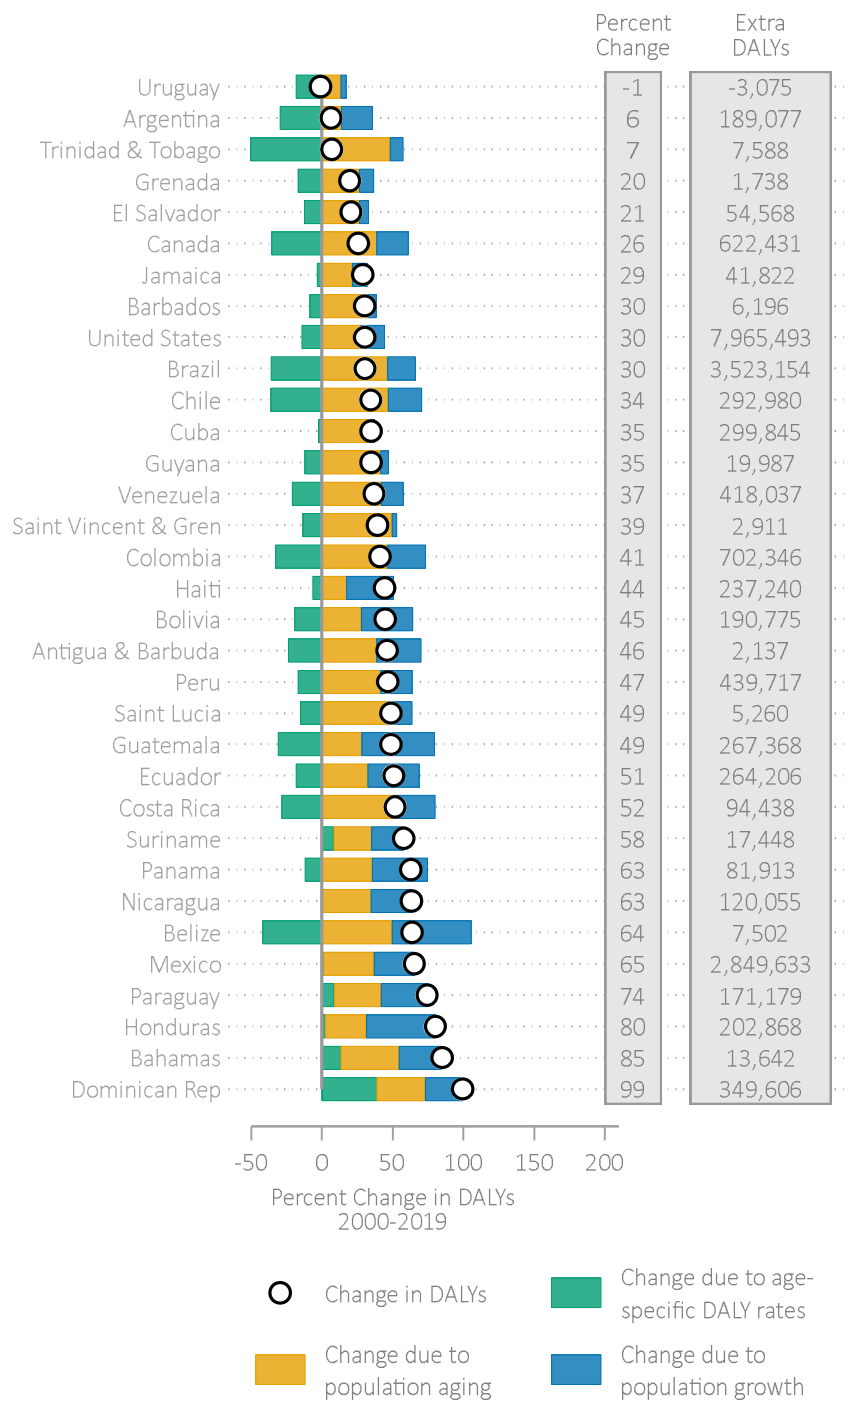



TABLE S8. Contribution of changes in population growth, population aging, and rates of age-specific morbidity to the percentage change in DALYs due to NCDs, 2000 to 2019. Men only.

| Country           | (1) DALYs (2000) | (2) DALYs (2019) | (3)       | (4)       | (5)  | (6)  | (7)  | (8)   |
|-------------------|------------------|------------------|-----------|-----------|------|------|------|-------|
| Antigua & Barbuda | 4,645            | 6,782            | 6,094     | 7,896     | 46.0 | 31.2 | 38.8 | -24.0 |
| Argentina         | 2,938,620        | 3,127,698        | 3,586,735 | 3,993,771 | 6.4  | 22.1 | 13.9 | -29.5 |
| Bahamas           | 16,070           | 29,713           | 20,947    | 27,567    | 84.9 | 30.3 | 41.2 | 13.4  |
| Barbados          | 20,548           | 26,745           | 21,865    | 28,503    | 30.2 | 6.4  | 32.3 | -8.6  |
| Belize            | 11,801           | 19,303           | 18,412    | 24,256    | 63.6 | 56.0 | 49.5 | -42.0 |
| Bolivia           | 426,769          | 617,545          | 582,447   | 700,501   | 44.7 | 36.5 | 27.7 | -19.4 |
| Brazil            | 11,579,757       | 15,102,912       | 13873668  | 19248226  | 30.4 | 19.8 | 46.4 | -35.8 |
| Canada            | 2,431,411        | 3,053,843        | 2,978,792 | 3,923,108 | 25.6 | 22.5 | 38.8 | -35.8 |
| Chile             | 849,325          | 1,142,306        | 1,051,143 | 1,448,898 | 34.5 | 23.8 | 46.8 | -36.1 |
| Colombia          | 1,715,391        | 2,417,737        | 2,182,124 | 2,977,385 | 40.9 | 27.2 | 46.4 | -32.6 |
| Costa Rica        | 182,599          | 277,038          | 231,621   | 328,938   | 51.7 | 26.8 | 53.3 | -28.4 |
| Cuba              | 864,984          | 1,164,830        | 877,588   | 1,188,344 | 34.7 | 1.5  | 35.9 | -2.7  |
| Dominican Rep     | 351,705          | 701,312          | 444,636   | 564,804   | 99.4 | 26.4 | 34.2 | 38.8  |
| Ecuador           | 520,865          | 785,071          | 711,148   | 880,408   | 50.7 | 36.5 | 32.5 | -18.3 |
| El Salvador       | 265,395          | 319,964          | 282,909   | 353,257   | 20.6 | 6.6  | 26.5 | -12.5 |
| Grenada           | 8,837            | 10,576           | 9,750     | 12,069    | 19.7 | 10.3 | 26.3 | -16.9 |
| Guatemala         | 547,924          | 815,292          | 830,018   | 984,181   | 48.8 | 51.5 | 28.1 | -30.8 |
| Guyana            | 57,369           | 77,357           | 60,634    | 84,368    | 34.8 | 5.7  | 41.4 | -12.2 |
| Haiti             | 534,767          | 772,007          | 713,136   | 807,181   | 44.4 | 33.4 | 17.6 | -6.6  |
| Honduras          | 253,017          | 455,886          | 376,798   | 450,228   | 80.2 | 48.9 | 29.0 | 2.2   |
| Jamaica           | 144,532          | 186,355          | 160,224   | 191,222   | 28.9 | 10.9 | 21.4 | -3.4  |
| Mexico            | 4,365,946        | 7,215,580        | 5,610,810 | 7,165,738 | 65.3 | 28.5 | 35.6 | 1.1   |
| Nicaragua         | 189,784          | 309,840          | 244,182   | 310,052   | 63.3 | 28.7 | 34.7 | -0.1  |
| Panama            | 130,200          | 212,113          | 181,307   | 227,660   | 62.9 | 39.3 | 35.6 | -11.9 |
| Paraguay          | 230,138          | 401,318          | 305,108   | 381,389   | 74.4 | 32.6 | 33.1 | 8.7   |
| Peru              | 942,997          | 1,382,714        | 1,154,424 | 1,543,256 | 46.6 | 22.4 | 41.2 | -17.0 |
| Saint Lucia       | 10,809           | 16,070           | 12,657    | 17,700    | 48.7 | 17.1 | 46.7 | -15.1 |
| St Vincent & Gren | 7,407            | 10,319           | 7,653     | 11,322    | 39.3 | 3.3  | 49.5 | -13.5 |
| Suriname          | 30,239           | 47,688           | 37,151    | 45,152    | 57.7 | 22.9 | 26.5 | 8.4   |
| Trinidad & Tobago | 109,395          | 116,984          | 119,496   | 172,264   | 6.9  | 9.2  | 48.2 | -50.5 |
| United States     | 26,261,956       | 34,227,449       | 30816434  | 37939452  | 30.3 | 17.3 | 27.1 | -14.1 |
| Uruguay           | 309,752          | 306,677          | 322,328   | 363,655   | -1.0 | 4.1  | 13.3 | -18.4 |
| Venezuela         | 1,135,984        | 1,554,021        | 1,314,305 | 1,791,083 | 36.8 | 15.7 | 42.0 | -20.9 |

(3) Expected DALYs due to population growth alone (4) Expected DALYs due to population aging (5) Percent change in DALYs (2000 to 2019) (6) Percent change due to growth (7) Percent change due to aging (8) Percent change due to age-stratified rate change

**PART THREE. DECOMPOSITION OF REASONS FOR DEATHS/DALYs BETWEEN 2000 and 2019 INCORPORATING UNCERTAINTY, FOR WOMEN AND MEN SEPARATELY**

FIGURE S9a. Contribution of changes in population growth, population aging, and rates of age-specific morbidity to the percentage change in deaths due to NCDs, 2000 to 2019, with associated sensitivity ranges for overall percentage change in deaths. Women and Men combined. Overall change in deaths based on point estimate.

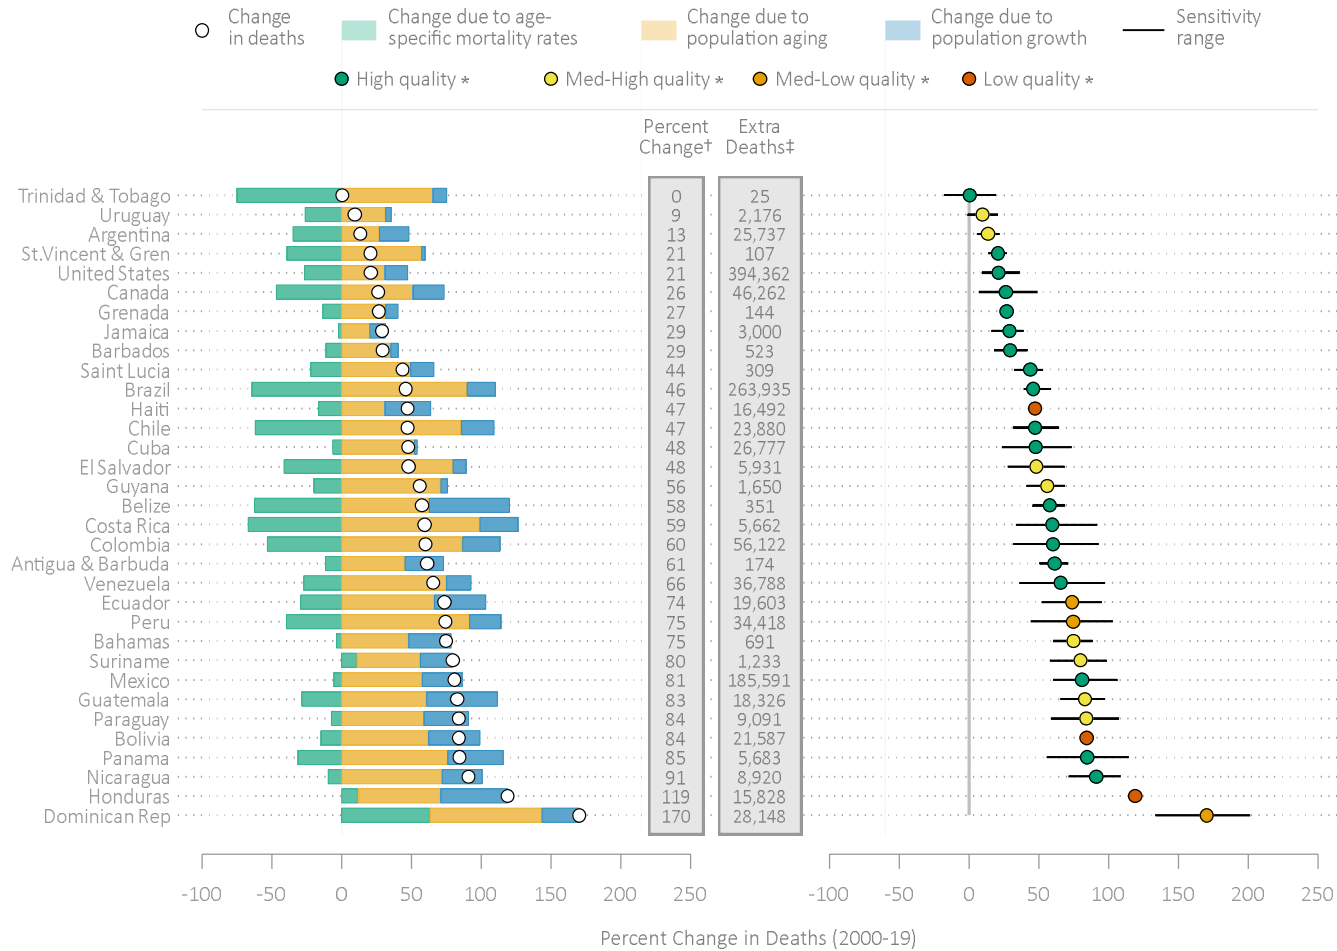

FIGURE S9b. Contribution of changes in population growth, population aging, and rates of age-specific morbidity to the percentage change in deaths due to NCDs, 2000 to 2019, with associated sensitivity ranges for overall percentage change in deaths. Women and Men combined. Overall change in deaths based on lower bound of WHO uncertainty interval.

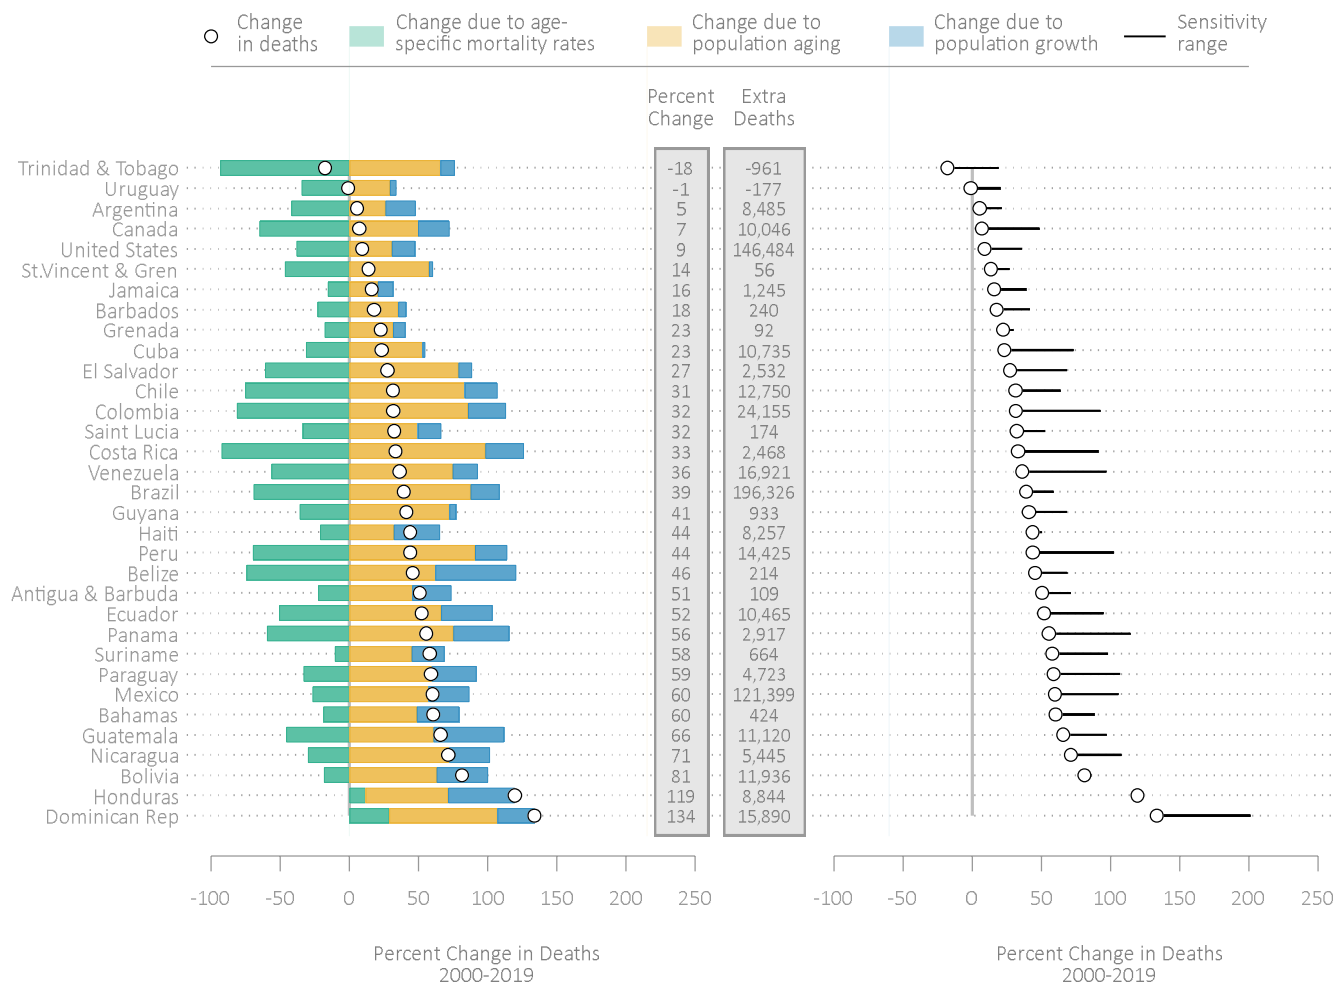

FIGURE S9c. Contribution of changes in population growth, population aging, and rates of age-specific morbidity to the percentage change in deaths due to NCDs, 2000 to 2019, with associated sensitivity ranges for overall percentage change in deaths. Women and Men combined. Overall change in deaths based on upper bound of WHO uncertainty interval.

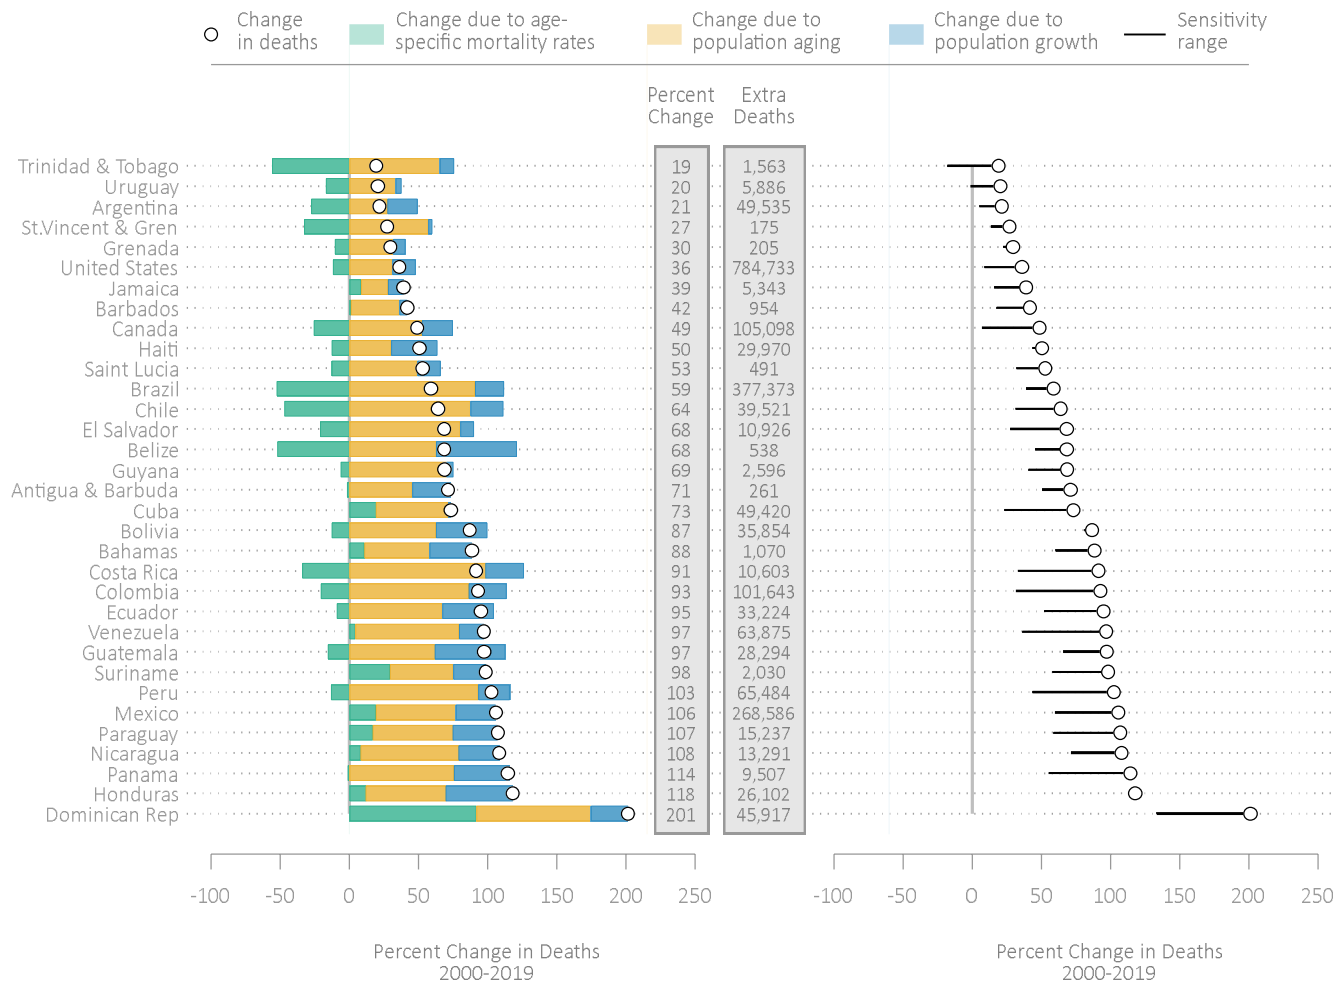

FIGURE S9d. Contribution of changes in population growth, population aging, and rates of age-specific morbidity to the percentage change in DALYs due to NCDs, 2000 to 2019, with associated sensitivity ranges for overall percentage change in DALYs. Women and Men combined. Overall change in DALYs based on point estimate.

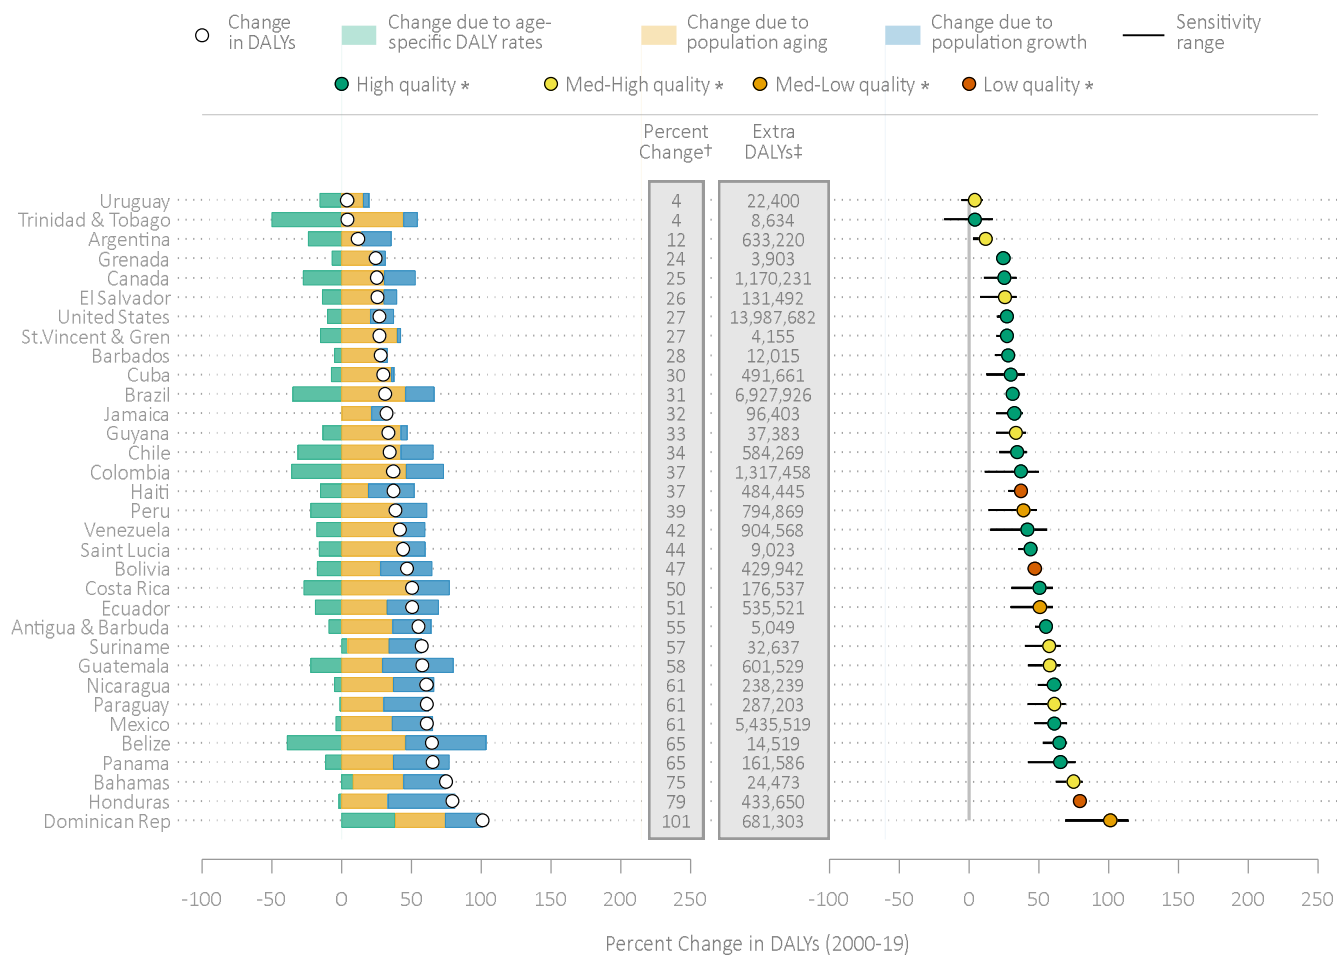

FIGURE S9e. Contribution of changes in population growth, population aging, and rates of age-specific morbidity to the percentage change in DALYs due to NCDs, 2000 to 2019, with associated sensitivity ranges for overall percentage change in DALYs. Women and Men combined. Overall change in DALYs based on lower bound of WHO uncertainty interval.

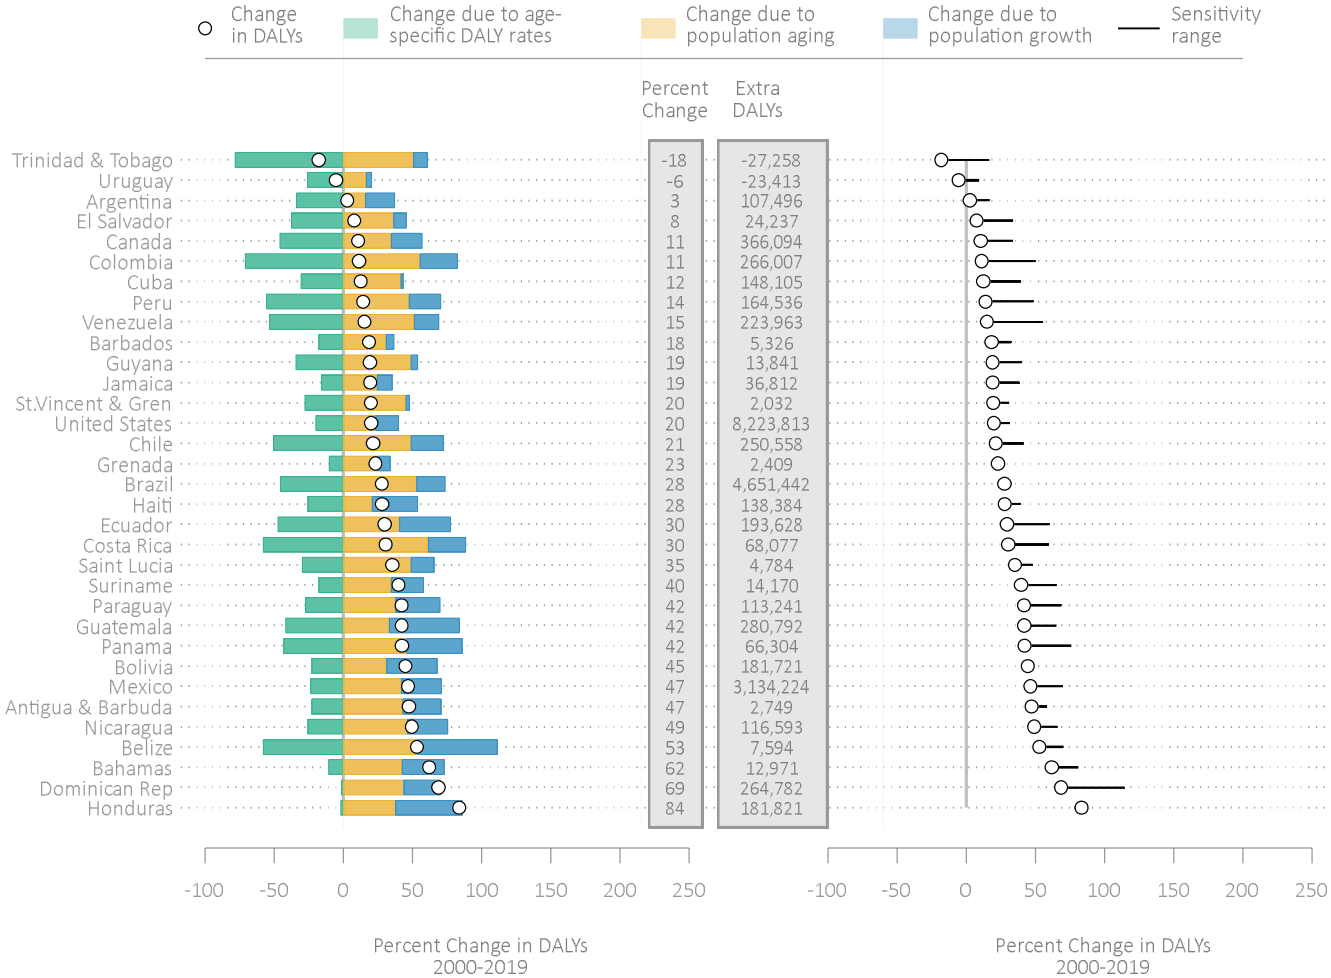

FIGURE S9f. Contribution of changes in population growth, population aging, and rates of age-specific morbidity to the percentage change in DALYs due to NCDs, 2000 to 2019, with associated sensitivity ranges for overall percentage change in DALYs. Women and Men combined. Overall change in DALYs based on upper bound of WHO uncertainty interval.

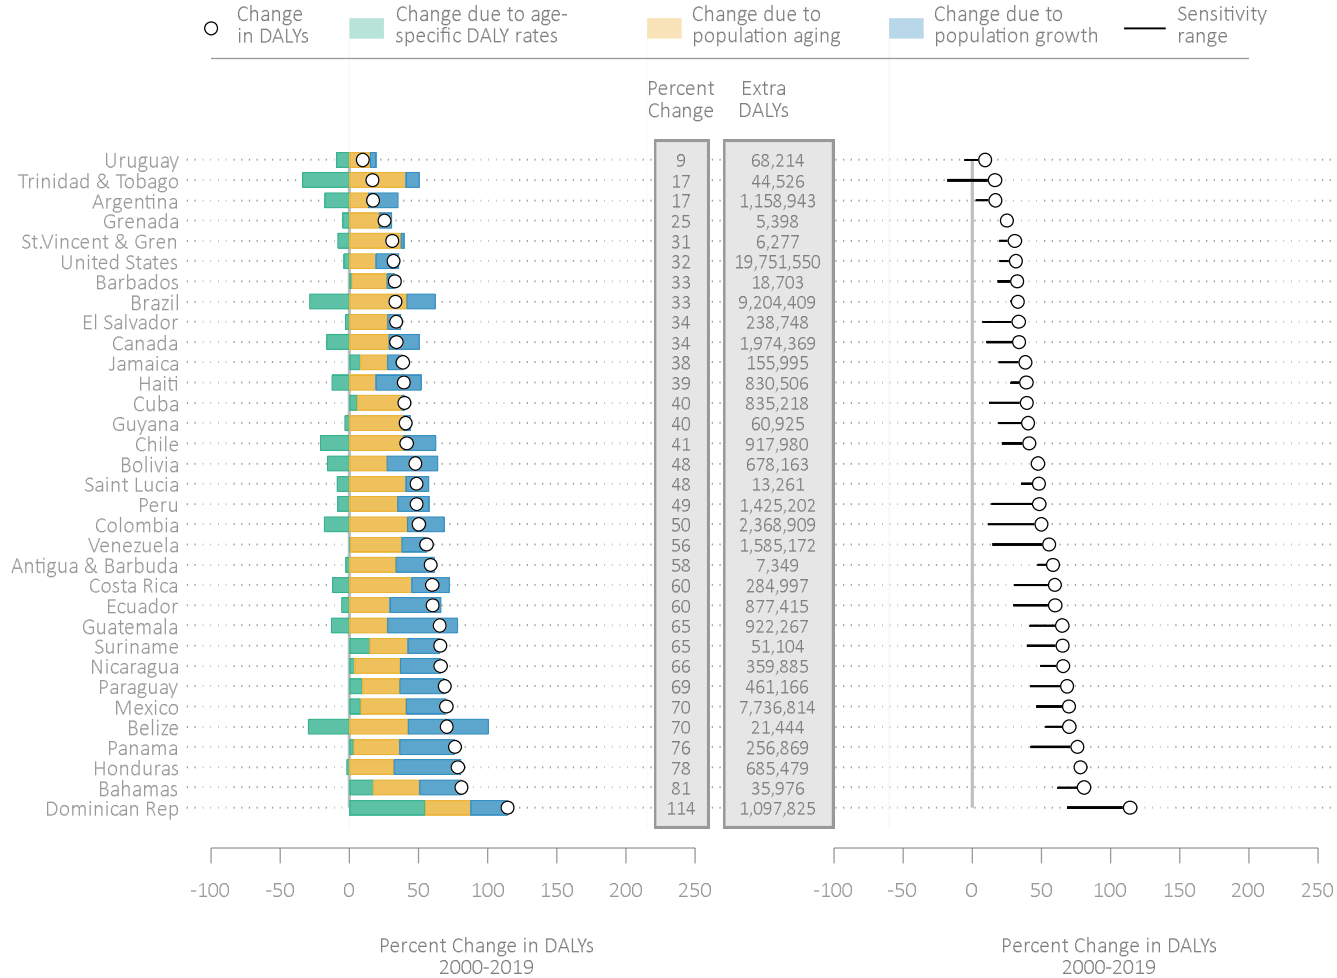

TABLE S9. Deaths/DALYs in 2000 and in 2019, and percentage change in deaths/DALYs between 2000 and 2019, with associated sensitivity ranges. Women and Men combined.

| Country           | Deaths or DALYs | Count in 2000 | Count in 2019 | Percentage change (2000 to 2019) | Lower bound of Sensitivity Range | Upper bound of Sensitivity Range |
|-------------------|-----------------|---------------|---------------|----------------------------------|----------------------------------|----------------------------------|
| Antigua & Barbuda | deaths          | 285           | 460           | 61.3                             | 50.6                             | 71.2                             |
| Argentina         | deaths          | 191,142       | 216,880       | 13.5                             | 5.4                              | 21.4                             |
| Bahamas           | deaths          | 925           | 1,617         | 74.7                             | 60.3                             | 88.5                             |
| Barbados          | deaths          | 1,785         | 2,309         | 29.3                             | 17.6                             | 41.7                             |
| Belize            | deaths          | 609           | 961           | 57.6                             | 45.6                             | 68.4                             |
| Bolivia           | deaths          | 25,649        | 47,236        | 84.2                             | 81.2                             | 86.7                             |
| Brazil            | deaths          | 574,993       | 838,929       | 45.9                             | 39.2                             | 58.8                             |
| Canada            | deaths          | 176,115       | 222,378       | 26.3                             | 7.0                              | 48.8                             |
| Chile             | deaths          | 50,561        | 74,442        | 47.2                             | 31.4                             | 64.0                             |
| Colombia          | deaths          | 93,466        | 149,588       | 60.0                             | 31.6                             | 92.8                             |
| Costa Rica        | deaths          | 9,516         | 15,179        | 59.5                             | 33.3                             | 91.4                             |
| Cuba              | deaths          | 56,256        | 83,033        | 47.6                             | 23.2                             | 73.2                             |
| Dominican Rep     | deaths          | 16,526        | 44,674        | 170.3                            | 133.6                            | 201.2                            |
| Ecuador           | deaths          | 26,597        | 46,201        | 73.7                             | 52.1                             | 95.0                             |
| El Salvador       | deaths          | 12,361        | 18,292        | 48.0                             | 27.3                             | 68.4                             |
| Grenada           | deaths          | 538           | 682           | 26.8                             | 22.5                             | 29.6                             |
| Guatemala         | deaths          | 22,099        | 40,426        | 82.9                             | 65.8                             | 97.2                             |
| Guyana            | deaths          | 2,950         | 4,601         | 55.9                             | 41.1                             | 68.6                             |
| Haiti             | deaths          | 34,953        | 51,445        | 47.2                             | 43.8                             | 50.5                             |
| Honduras          | deaths          | 13,302        | 29,131        | 119.0                            | 119.4                            | 117.9                            |
| Jamaica           | deaths          | 10,373        | 13,373        | 28.9                             | 16.0                             | 39.0                             |
| LAC               | deaths          | 3,597,661     | 4,857,202     | 35.0                             | 21.5                             | 51.7                             |
| Mexico            | deaths          | 229,475       | 415,067       | 80.9                             | 59.9                             | 105.7                            |
| Nicaragua         | deaths          | 9,794         | 18,714        | 91.1                             | 71.3                             | 108.1                            |
| Panama            | deaths          | 6,725         | 12,409        | 84.5                             | 55.5                             | 114.4                            |
| Paraguay          | deaths          | 10,837        | 19,928        | 83.9                             | 58.8                             | 107.1                            |
| Peru              | deaths          | 46,180        | 80,598        | 74.5                             | 43.8                             | 102.5                            |
| Saint Lucia       | deaths          | 708           | 1,018         | 43.8                             | 32.3                             | 52.8                             |
| St Vincent & Gren | deaths          | 521           | 629           | 20.7                             | 13.6                             | 27.1                             |
| Suriname          | deaths          | 1,549         | 2,782         | 79.6                             | 57.9                             | 98.4                             |
| Trinidad & Tobago | deaths          | 6,651         | 6,677         | 0.4                              | -17.8                            | 19.2                             |
| United States     | deaths          | 1,885,073     | 2,279,436     | 20.9                             | 9.1                              | 36.0                             |
| Uruguay           | deaths          | 23,004        | 25,180        | 9.5                              | -1.0                             | 20.4                             |
| Venezuela         | deaths          | 56,143        | 92,931        | 65.5                             | 36.2                             | 97.0                             |
| Antigua & Barbuda | daly            | 9,189         | 14,238        | 55.0                             | 47.3                             | 58.5                             |
| Argentina         | daly            | 5,394,689     | 6,027,909     | 11.7                             | 2.7                              | 16.9                             |
| Bahamas           | daly            | 32,688        | 57,162        | 74.9                             | 61.9                             | 81.0                             |
| Barbados          | daly            | 43,092        | 55,107        | 27.9                             | 18.4                             | 32.7                             |
| Belize            | daly            | 22,442        | 36,961        | 64.7                             | 52.9                             | 70.2                             |
| Bolivia           | daly            | 915,367       | 1,345,310     | 47.0                             | 44.6                             | 47.6                             |
| Brazil            | daly            | 22,262,443    | 29,190,370    | 31.1                             | 27.8                             | 33.1                             |
| Canada            | daly            | 4,644,639     | 5,814,871     | 25.2                             | 10.6                             | 33.9                             |
| Chile             | daly            | 1,698,492     | 2,282,762     | 34.4                             | 21.3                             | 41.3                             |
| Colombia          | daly            | 3,562,572     | 4,880,031     | 37.0                             | 11.1                             | 50.0                             |
| Costa Rica        | daly            | 350,424       | 526,962       | 50.4                             | 30.4                             | 59.7                             |
| Cuba              | daly            | 1,649,266     | 2,140,928     | 29.8                             | 12.4                             | 39.6                             |
| Dominican Rep     | daly            | 673,528       | 1,354,832     | 101.2                            | 68.6                             | 114.2                            |
| Ecuador           | daly            | 1,057,044     | 1,592,565     | 50.7                             | 29.6                             | 60.1                             |
| El Salvador       | daly            | 513,299       | 644,792       | 25.6                             | 7.6                              | 33.7                             |



|                   |      |             |             |      |       |      |
|-------------------|------|-------------|-------------|------|-------|------|
| Grenada           | daly | 15,957      | 19,861      | 24.5 | 23.0  | 25.2 |
| Guatemala         | daly | 1,041,662   | 1,643,192   | 57.7 | 42.0  | 65.2 |
| Guyana            | daly | 111,667     | 149,050     | 33.5 | 19.0  | 40.5 |
| Haiti             | daly | 1,306,010   | 1,790,456   | 37.1 | 27.8  | 39.3 |
| Honduras          | daly | 546,956     | 980,606     | 79.3 | 83.5  | 78.2 |
| Jamaica           | daly | 298,319     | 394,722     | 32.3 | 19.2  | 38.5 |
| LAC               | daly | 113,010,408 | 149,689,870 | 32.5 | 22.7  | 38.3 |
| Mexico            | daly | 8,895,571   | 14,331,091  | 61.1 | 46.6  | 69.9 |
| Nicaragua         | daly | 391,884     | 630,124     | 60.8 | 49.2  | 65.8 |
| Panama            | daly | 247,326     | 408,913     | 65.3 | 42.2  | 76.1 |
| Paraguay          | daly | 470,717     | 757,921     | 61.0 | 42.0  | 68.7 |
| Peru              | daly | 2,051,114   | 2,845,983   | 38.8 | 14.1  | 48.6 |
| Saint Lucia       | daly | 20,510      | 29,533      | 44.0 | 35.2  | 48.3 |
| St Vincent & Gren | daly | 15,336      | 19,491      | 27.1 | 19.6  | 30.9 |
| Suriname          | daly | 56,846      | 89,483      | 57.4 | 39.8  | 65.5 |
| Trinidad & Tobago | daly | 210,019     | 218,653     | 4.1  | -18.0 | 16.6 |
| United States     | daly | 51,759,797  | 65,747,479  | 27.0 | 19.9  | 31.7 |
| Uruguay           | daly | 572,110     | 594,510     | 3.9  | -5.6  | 9.4  |
| Venezuela         | daly | 2,169,434   | 3,074,003   | 41.7 | 15.0  | 55.6 |

FIGURE S10a. Contribution of changes in population growth, population aging, and rates of age-specific morbidity to the percentage change in deaths due to NCDs, 2000 to 2019, with associated sensitivity ranges for overall percentage change in deaths. Women only. Overall change in deaths based on point estimate.

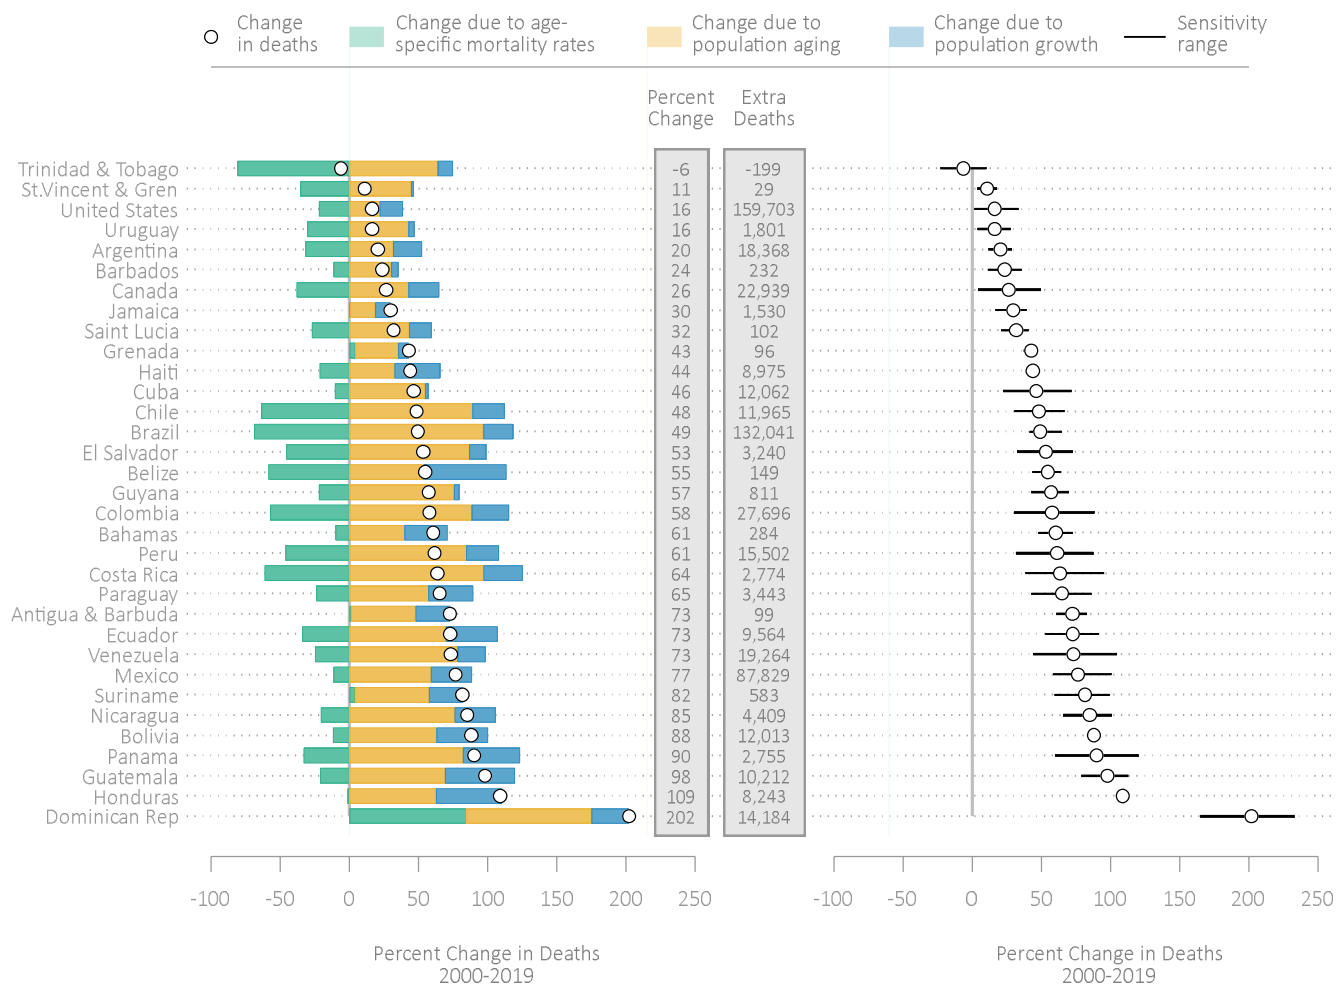

FIGURE S10b. Contribution of changes in population growth, population aging, and rates of age-specific morbidity to the percentage change in deaths due to NCDs, 2000 to 2019, with associated sensitivity ranges for overall percentage change in deaths. Women only. Overall change in deaths based on lower bound of WHO uncertainty interval.

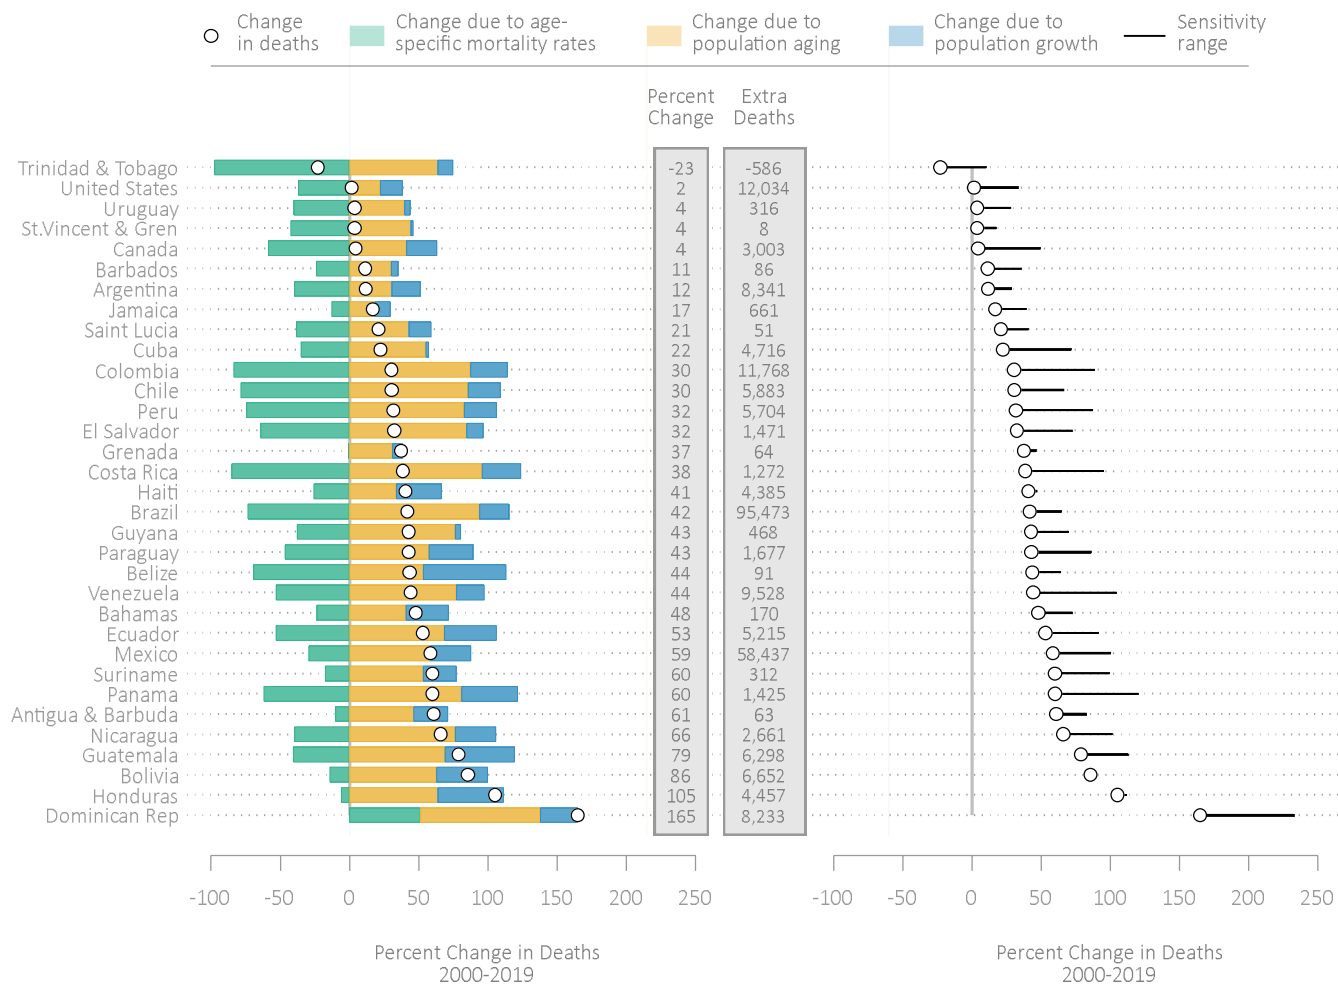

FIGURE S10c. Contribution of changes in population growth, population aging, and rates of age-specific morbidity to the percentage change in deaths due to NCDs, 2000 to 2019, with associated sensitivity ranges for overall percentage change in deaths. Women only. Overall change in deaths based on upper bound of WHO uncertainty interval.

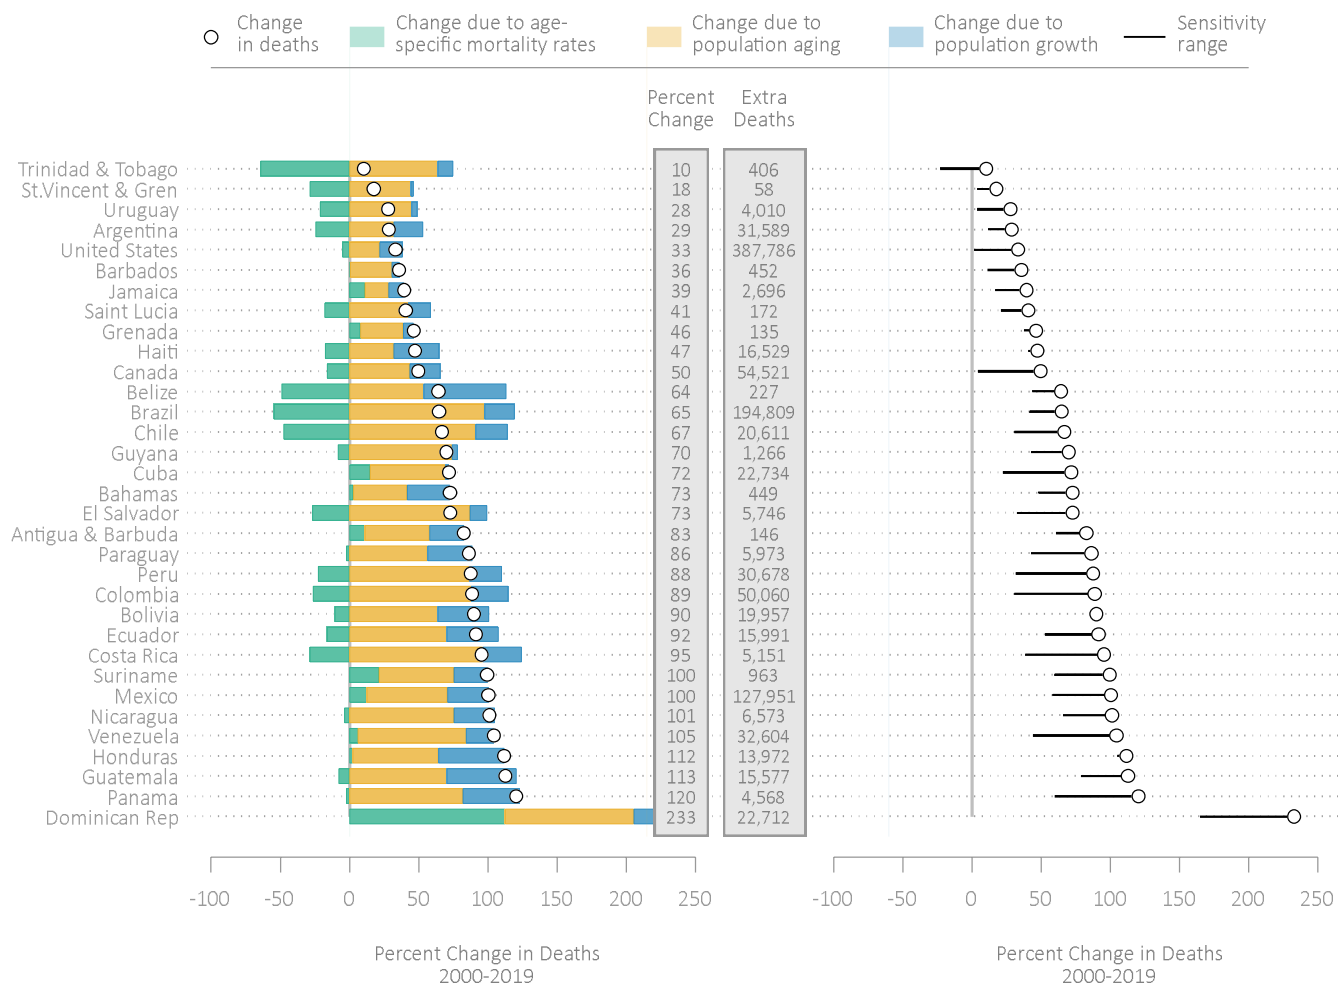

FIGURE S10d. Contribution of changes in population growth, population aging, and rates of age-specific morbidity to the percentage change in DALYs due to NCDs, 2000 to 2019, with associated sensitivity ranges for overall percentage change in DALYs. Women only. Overall change in DALYs based on point estimate.

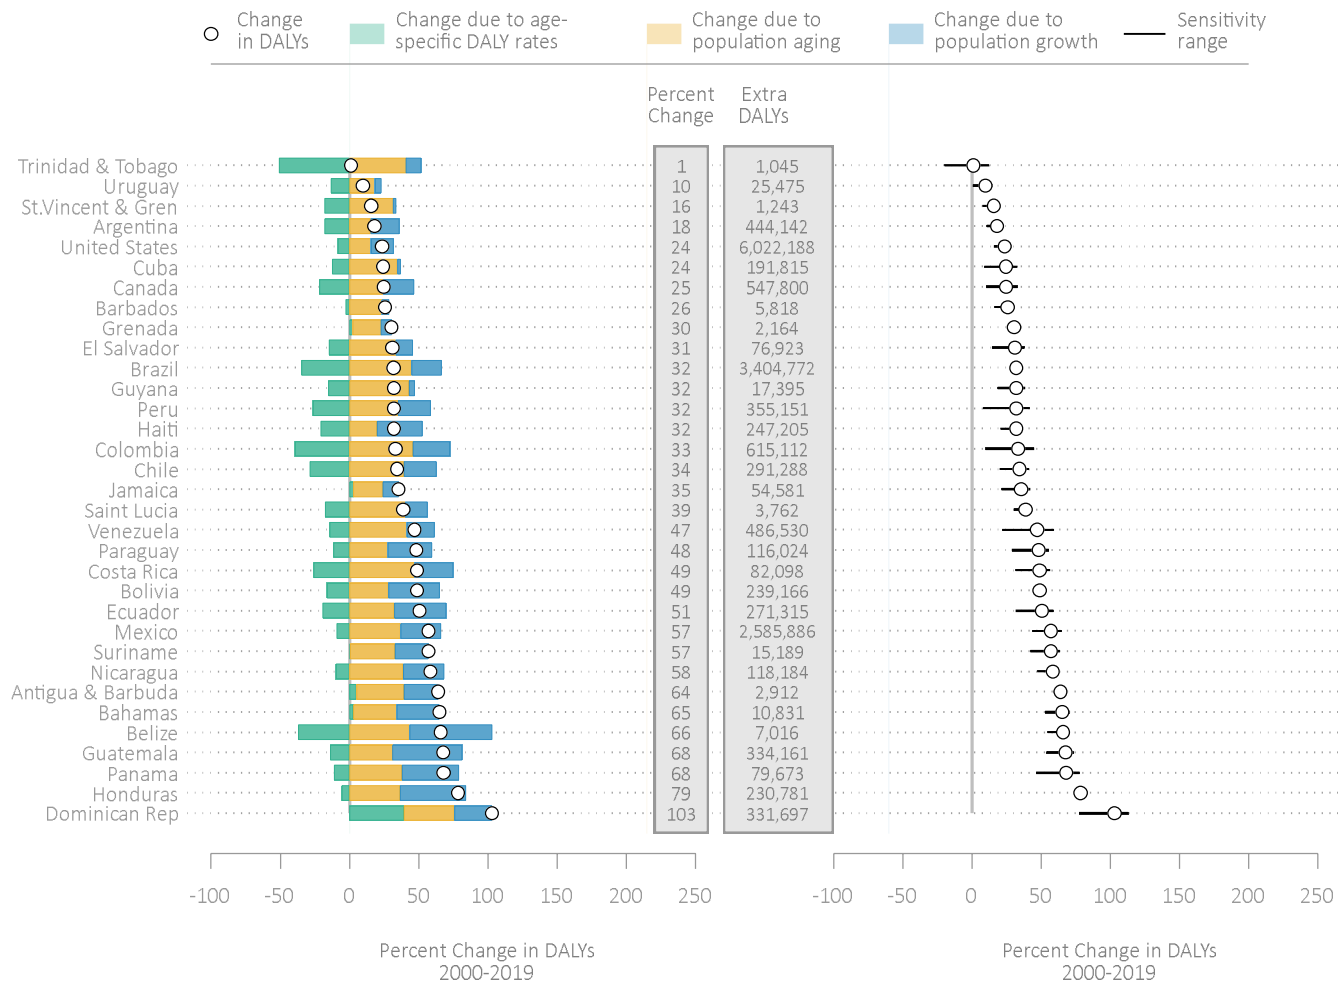

FIGURE S10e. Contribution of changes in population growth, population aging, and rates of age-specific morbidity to the percentage change in DALYs due to NCDs, 2000 to 2019, with associated sensitivity ranges for overall percentage change in DALYs. Women only. Overall change in DALYs based on lower bound of WHO uncertainty interval.

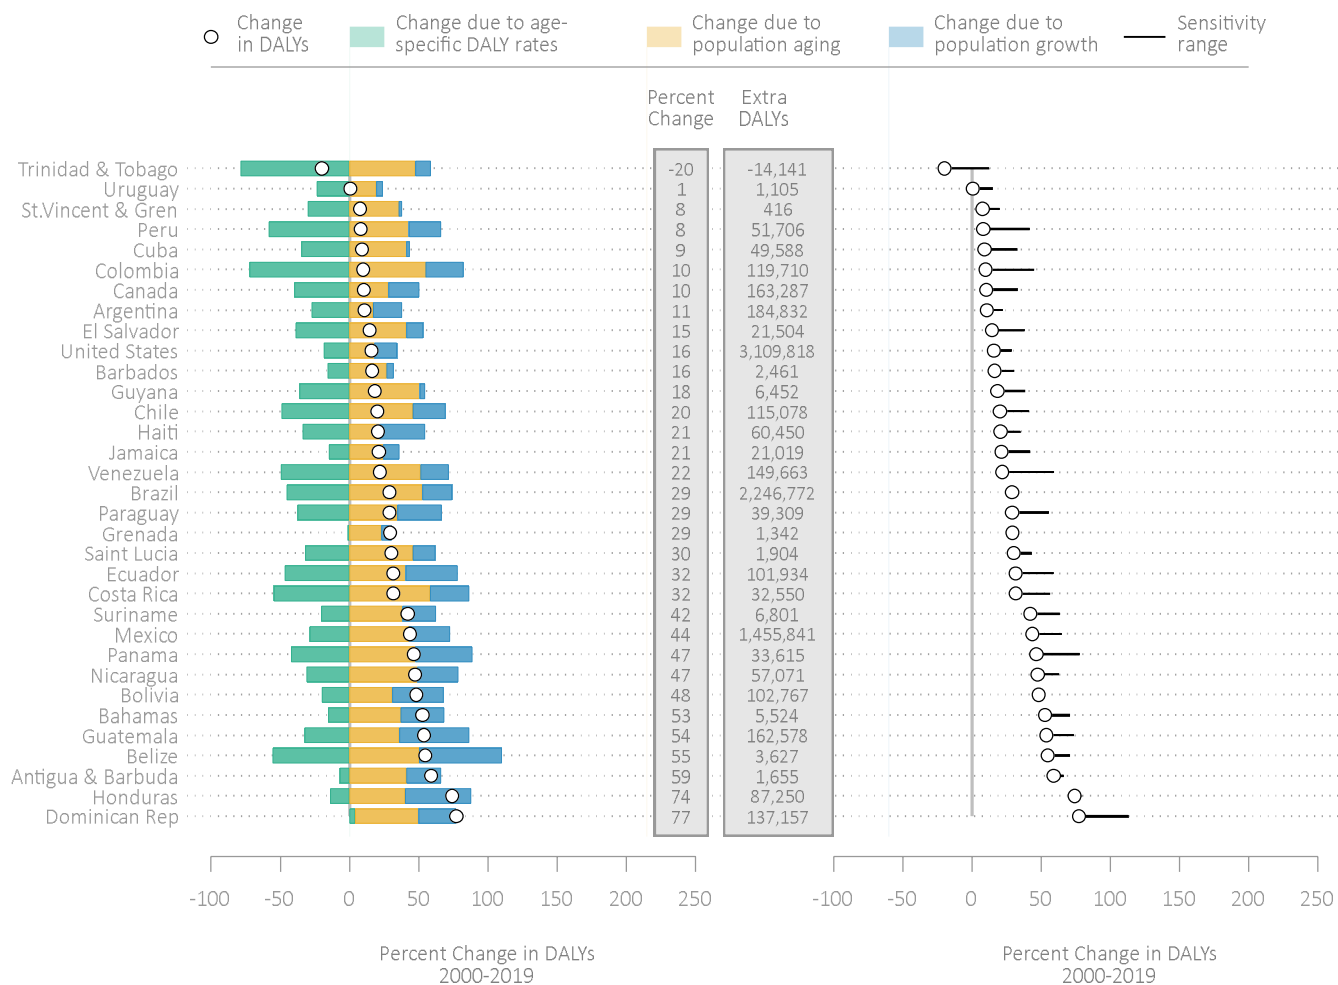

FIGURE S10f. Contribution of changes in population growth, population aging, and rates of age-specific morbidity to the percentage change in DALYs due to NCDs, 2000 to 2019, with associated sensitivity ranges for overall percentage change in DALYs. Women only. Overall change in DALYs based on upper bound of WHO uncertainty interval.

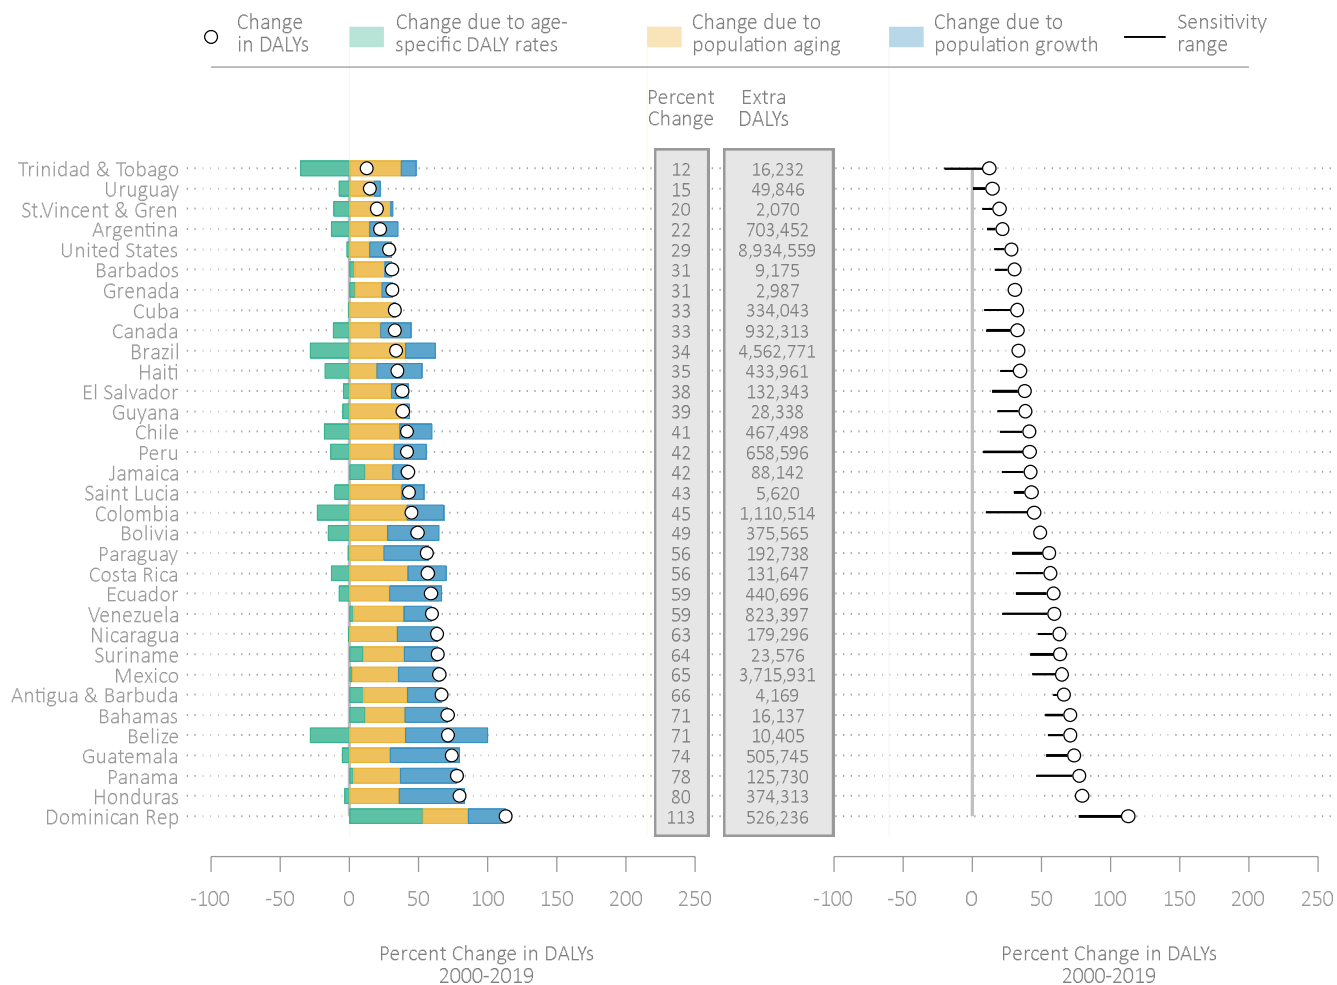

TABLE S10. Deaths/DALYs in 2000 and in 2019, and percentage change in deaths/DALYs between 2000 and 2019, with associated sensitivity ranges. Women only.

| Country           | Deaths or DALYs | Count in 2000 | Count in 2019 | Percentage change (2000 to 2019) | Lower bound of Sensitivity Range | Upper bound of Sensitivity Range |
|-------------------|-----------------|---------------|---------------|----------------------------------|----------------------------------|----------------------------------|
| Antigua & Barbuda | deaths          | 138           | 237           | 72.6                             | 60.9                             | 82.7                             |
| Argentina         | deaths          | 89,650        | 108,018       | 20.5                             | 11.6                             | 28.6                             |
| Bahamas           | deaths          | 471           | 756           | 60.5                             | 48.0                             | 72.7                             |
| Barbados          | deaths          | 983           | 1,215         | 23.6                             | 11.4                             | 35.8                             |
| Belize            | deaths          | 273           | 422           | 54.7                             | 43.5                             | 64.3                             |
| Bolivia           | deaths          | 13,659        | 25,672        | 88.0                             | 85.6                             | 90.0                             |
| Brazil            | deaths          | 268,182       | 400,223       | 49.2                             | 41.8                             | 64.8                             |
| Canada            | deaths          | 86,691        | 109,631       | 26.5                             | 4.5                              | 49.7                             |
| Chile             | deaths          | 24,771        | 36,736        | 48.3                             | 30.5                             | 66.9                             |
| Colombia          | deaths          | 47,912        | 75,608        | 57.8                             | 30.5                             | 88.7                             |
| Costa Rica        | deaths          | 4,368         | 7,142         | 63.5                             | 38.5                             | 95.4                             |
| Cuba              | deaths          | 26,031        | 38,093        | 46.3                             | 22.4                             | 71.8                             |
| Dominican Rep     | deaths          | 7,024         | 21,208        | 201.9                            | 164.9                            | 232.8                            |
| Ecuador           | deaths          | 13,159        | 22,723        | 72.7                             | 53.1                             | 91.5                             |
| El Salvador       | deaths          | 6,084         | 9,324         | 53.3                             | 32.4                             | 72.8                             |
| Grenada           | deaths          | 226           | 323           | 42.7                             | 37.4                             | 46.4                             |
| Guatemala         | deaths          | 10,433        | 20,646        | 97.9                             | 78.8                             | 112.8                            |
| Guyana            | deaths          | 1,418         | 2,229         | 57.2                             | 42.7                             | 70.0                             |
| Haiti             | deaths          | 20,424        | 29,399        | 43.9                             | 40.6                             | 47.3                             |
| Honduras          | deaths          | 7,572         | 15,816        | 108.9                            | 105.2                            | 111.8                            |
| Jamaica           | deaths          | 5,162         | 6,693         | 29.7                             | 16.9                             | 39.5                             |
| LAC               | deaths          | 1,810,813     | 2,403,526     | 32.7                             | 17.7                             | 50.5                             |
| Mexico            | deaths          | 114,779       | 202,609       | 76.5                             | 58.5                             | 100.4                            |
| Nicaragua         | deaths          | 5,183         | 9,593         | 85.1                             | 66.0                             | 101.2                            |
| Panama            | deaths          | 3,061         | 5,817         | 90.0                             | 60.1                             | 120.4                            |
| Paraguay          | deaths          | 5,290         | 8,733         | 65.1                             | 42.9                             | 86.4                             |
| Peru              | deaths          | 25,218        | 40,720        | 61.5                             | 31.8                             | 87.6                             |
| Saint Lucia       | deaths          | 322           | 425           | 31.9                             | 20.9                             | 40.7                             |
| St Vincent & Gren | deaths          | 273           | 302           | 10.9                             | 3.7                              | 17.6                             |
| Suriname          | deaths          | 716           | 1,299         | 81.6                             | 60.0                             | 99.6                             |
| Trinidad & Tobago | deaths          | 3,170         | 2,970         | -6.3                             | -22.8                            | 10.4                             |
| United States     | deaths          | 980,819       | 1,140,522     | 16.3                             | 1.5                              | 33.3                             |
| Uruguay           | deaths          | 11,033        | 12,834        | 16.3                             | 3.7                              | 28.0                             |
| Venezuela         | deaths          | 26,321        | 45,586        | 73.2                             | 44.2                             | 104.5                            |
| Antigua & Barbuda | daly            | 4,544         | 7,456         | 64.1                             | 59.1                             | 66.3                             |
| Argentina         | daly            | 2,456,069     | 2,900,212     | 18.1                             | 10.7                             | 22.1                             |
| Bahamas           | daly            | 16,618        | 27,450        | 65.2                             | 52.8                             | 70.9                             |
| Barbados          | daly            | 22,544        | 28,362        | 25.8                             | 16.4                             | 30.5                             |
| Belize            | daly            | 10,641        | 17,658        | 65.9                             | 54.7                             | 71.0                             |
| Bolivia           | daly            | 488,598       | 727,765       | 48.9                             | 48.2                             | 49.2                             |
| Brazil            | daly            | 10,682,686    | 14,087,458    | 31.9                             | 29.0                             | 33.5                             |
| Canada            | daly            | 2,213,228     | 2,761,028     | 24.8                             | 10.3                             | 32.8                             |
| Chile             | daly            | 849,167       | 1,140,456     | 34.3                             | 20.3                             | 41.3                             |
| Colombia          | daly            | 1,847,181     | 2,462,293     | 33.3                             | 9.8                              | 44.8                             |
| Costa Rica        | daly            | 167,825       | 249,924       | 48.9                             | 31.7                             | 56.5                             |
| Cuba              | daly            | 784,282       | 976,098       | 24.5                             | 9.1                              | 32.7                             |
| Dominican Rep     | daly            | 321,822       | 653,520       | 103.1                            | 77.2                             | 112.9                            |
| Ecuador           | daly            | 536,179       | 807,494       | 50.6                             | 31.6                             | 58.8                             |
| El Salvador       | daly            | 247,904       | 324,828       | 31.0                             | 14.5                             | 38.1                             |



|                   |      |            |            |      |       |      |
|-------------------|------|------------|------------|------|-------|------|
| Grenada           | daly | 7,120      | 9,285      | 30.4 | 29.3  | 30.9 |
| Guatemala         | daly | 493,738    | 827,900    | 67.7 | 53.8  | 73.8 |
| Guyana            | daly | 54,298     | 71,694     | 32.0 | 18.4  | 38.5 |
| Haiti             | daly | 771,243    | 1,018,449  | 32.1 | 20.7  | 34.7 |
| Honduras          | daly | 293,938    | 524,720    | 78.5 | 74.2  | 79.6 |
| Jamaica           | daly | 153,786    | 208,368    | 35.5 | 21.3  | 42.2 |
| LAC               | daly | 55,559,468 | 72,778,828 | 31.0 | 21.2  | 36.5 |
| Mexico            | daly | 4,529,625  | 7,115,511  | 57.1 | 43.8  | 64.8 |
| Nicaragua         | daly | 202,100    | 320,284    | 58.5 | 47.5  | 63.1 |
| Panama            | daly | 117,126    | 196,799    | 68.0 | 46.5  | 77.6 |
| Paraguay          | daly | 240,579    | 356,603    | 48.2 | 29.0  | 55.7 |
| Peru              | daly | 1,108,117  | 1,463,268  | 32.1 | 8.2   | 41.6 |
| Saint Lucia       | daly | 9,701      | 13,464     | 38.8 | 30.2  | 43.0 |
| St Vincent & Gren | daly | 7,929      | 9,172      | 15.7 | 7.7   | 19.8 |
| Suriname          | daly | 26,606     | 41,796     | 57.1 | 42.1  | 63.6 |
| Trinidad & Tobago | daly | 100,624    | 101,669    | 1.0  | -19.9 | 12.5 |
| United States     | daly | 25,497,841 | 31,520,030 | 23.6 | 15.8  | 28.5 |
| Uruguay           | daly | 262,358    | 287,834    | 9.7  | 0.6   | 14.7 |
| Venezuela         | daly | 1,033,451  | 1,519,982  | 47.1 | 22.0  | 59.4 |

FIGURE S11a. Contribution of changes in population growth, population aging, and rates of age-specific morbidity to the percentage change in deaths due to NCDs, 2000 to 2019, with associated sensitivity ranges for overall percentage change in deaths. Men only. Overall change in deaths based on point estimate.

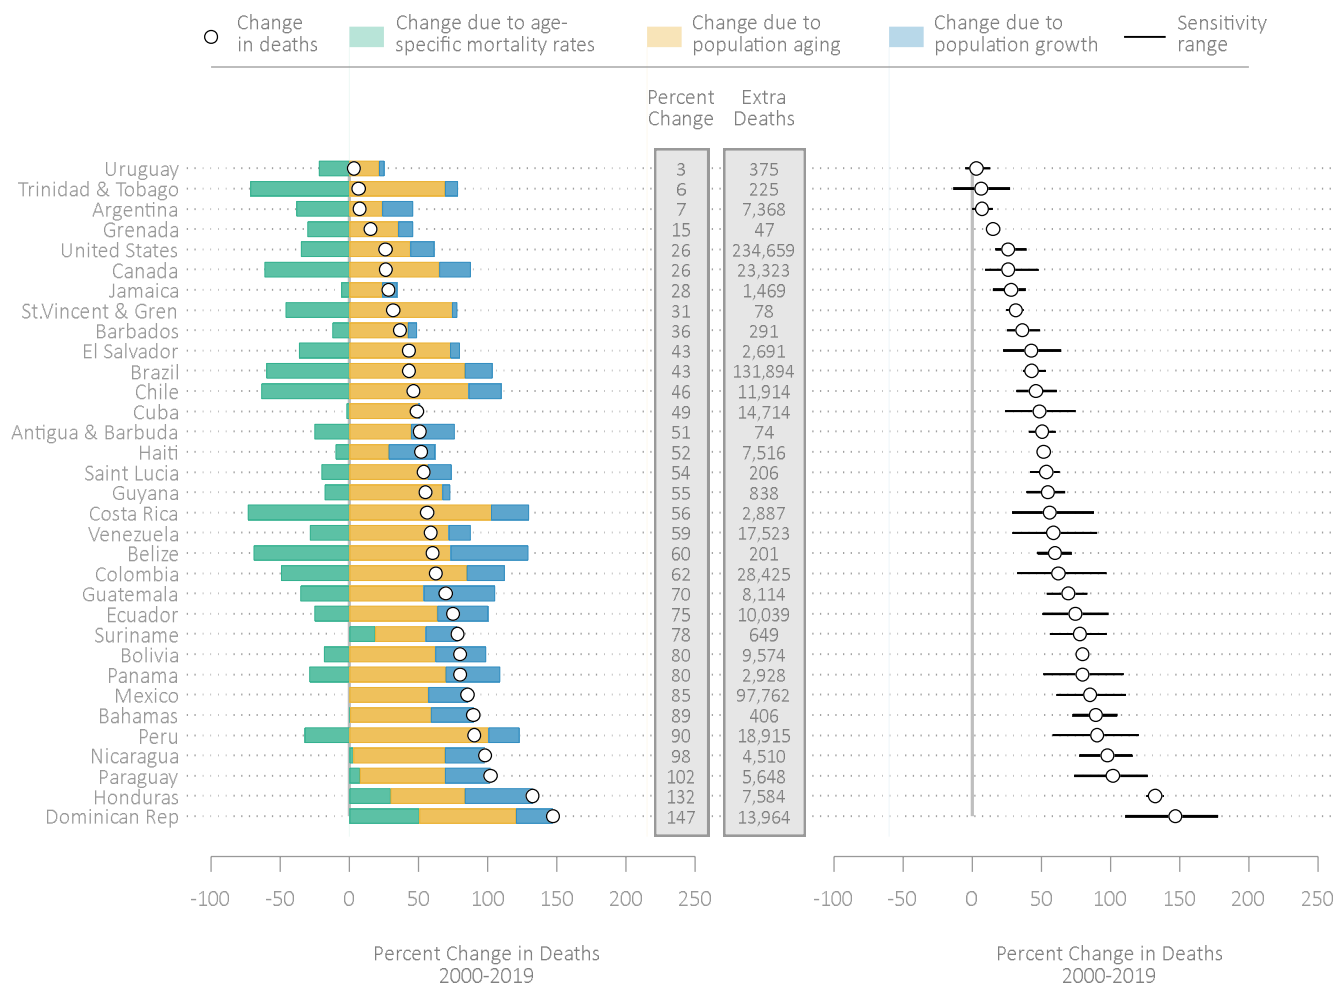

FIGURE S11b. Contribution of changes in population growth, population aging, and rates of age-specific morbidity to the percentage change in deaths due to NCDs, 2000 to 2019, with associated sensitivity ranges for overall percentage change in deaths. Men only. Overall change in deaths based on lower bound of WHO uncertainty interval.

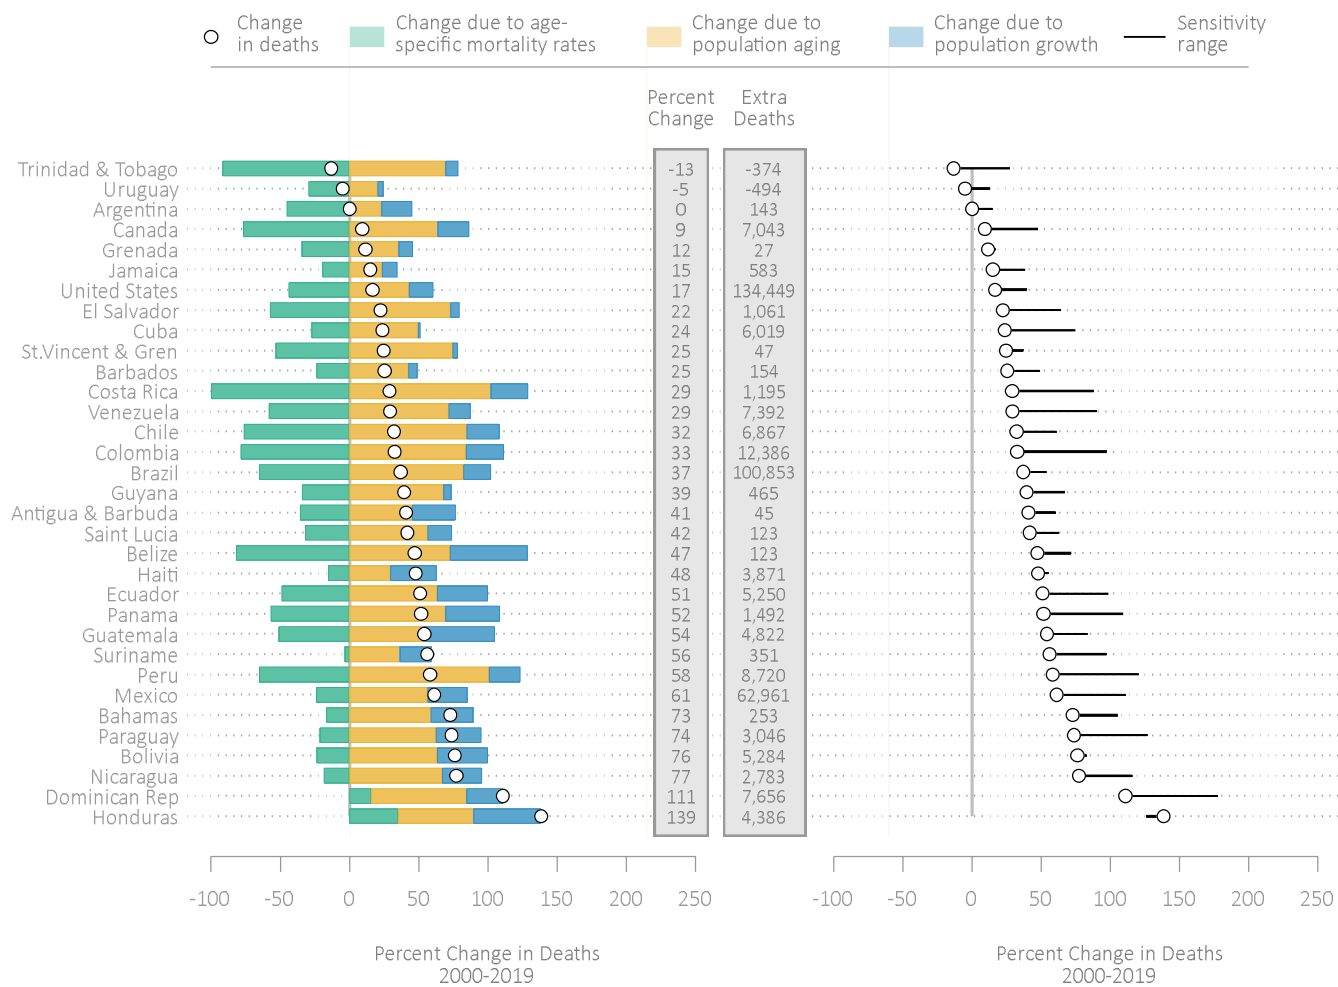

FIGURE S11c. Contribution of changes in population growth, population aging, and rates of age-specific morbidity to the percentage change in deaths due to NCDs, 2000 to 2019, with associated sensitivity ranges for overall percentage change in deaths. Men only. Overall change in deaths based on upper bound of WHO uncertainty interval.

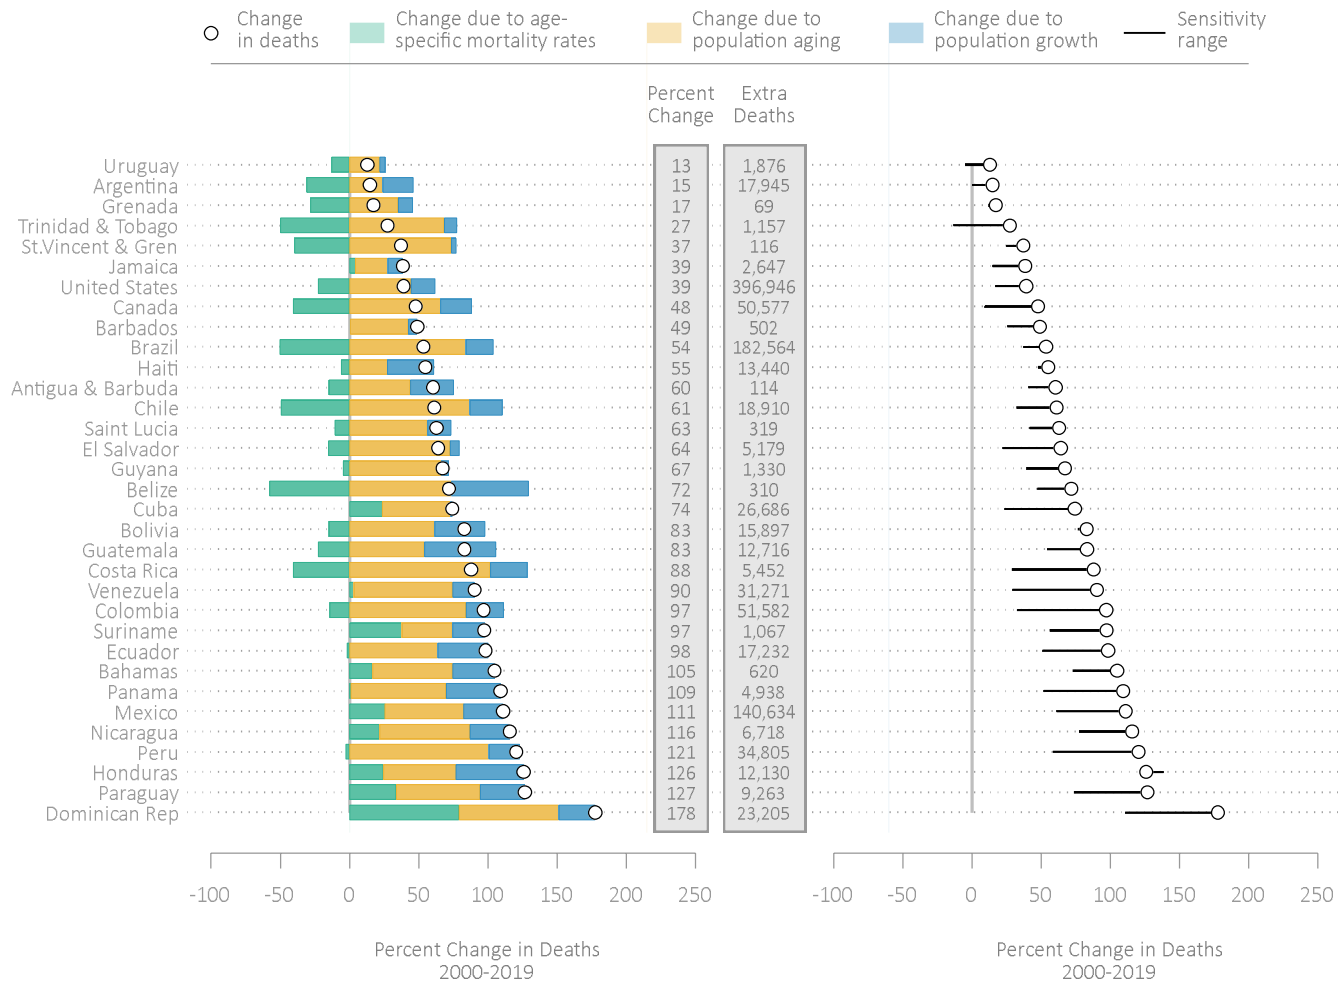

FIGURE S11d. Contribution of changes in population growth, population aging, and rates of age-specific morbidity to the percentage change in DALYs due to NCDs, 2000 to 2019, with associated sensitivity ranges for overall percentage change in DALYs. Men only. Overall change in DALYs based on point estimate.

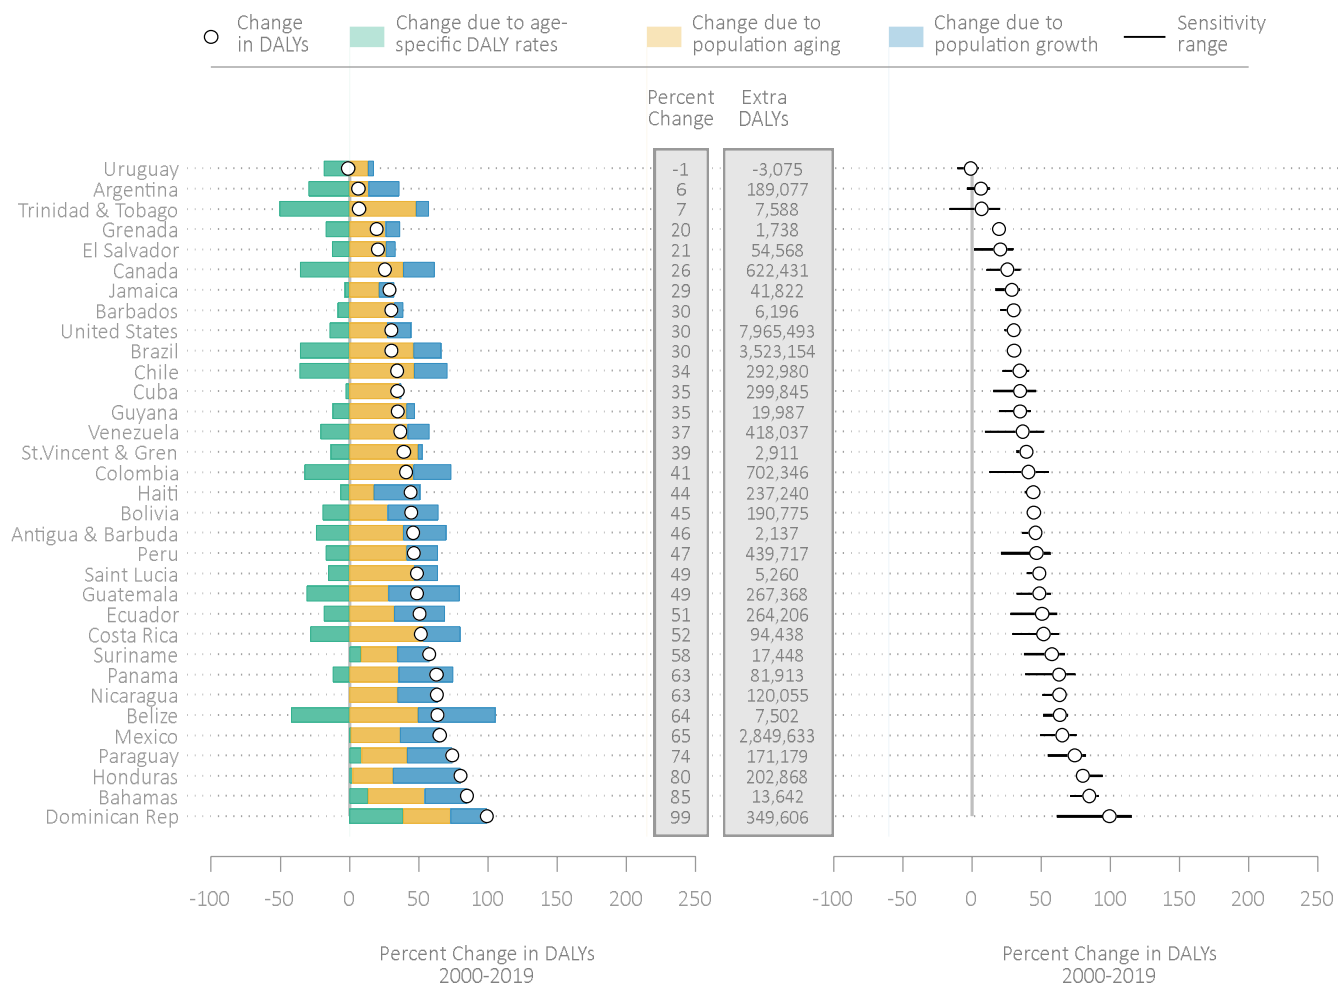

FIGURE S11e. Contribution of changes in population growth, population aging, and rates of age-specific morbidity to the percentage change in DALYs due to NCDs, 2000 to 2019, with associated sensitivity ranges for overall percentage change in DALYs. Men only. Overall change in DALYs based on lower bound of WHO uncertainty interval.

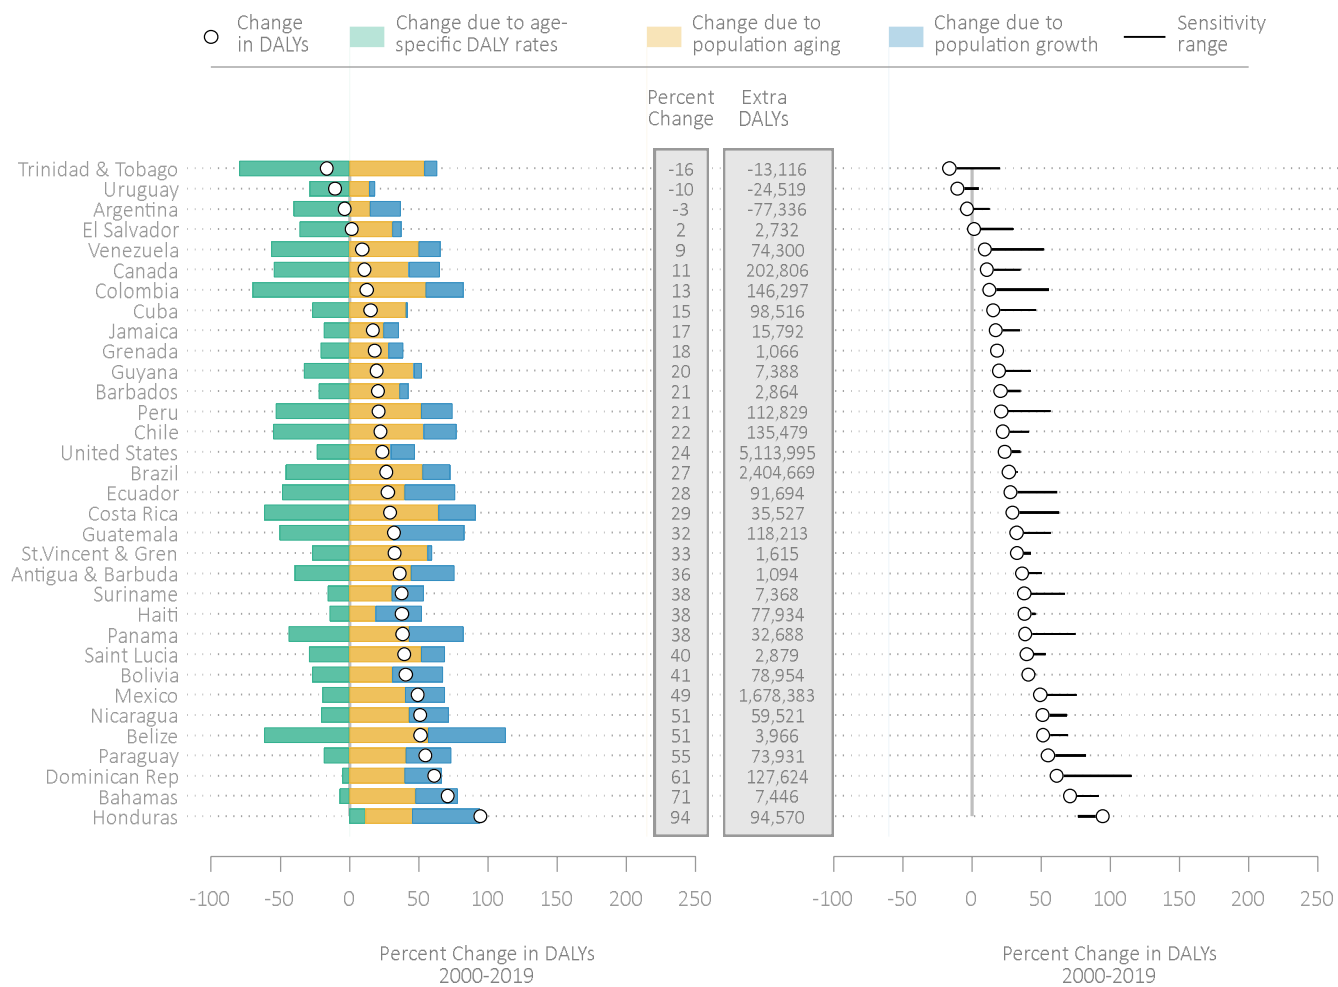

FIGURE S11f. Contribution of changes in population growth, population aging, and rates of age-specific morbidity to the percentage change in DALYs due to NCDs, 2000 to 2019, with associated sensitivity ranges for overall percentage change in DALYs. Men only. Overall change in DALYs based on upper bound of WHO uncertainty interval.

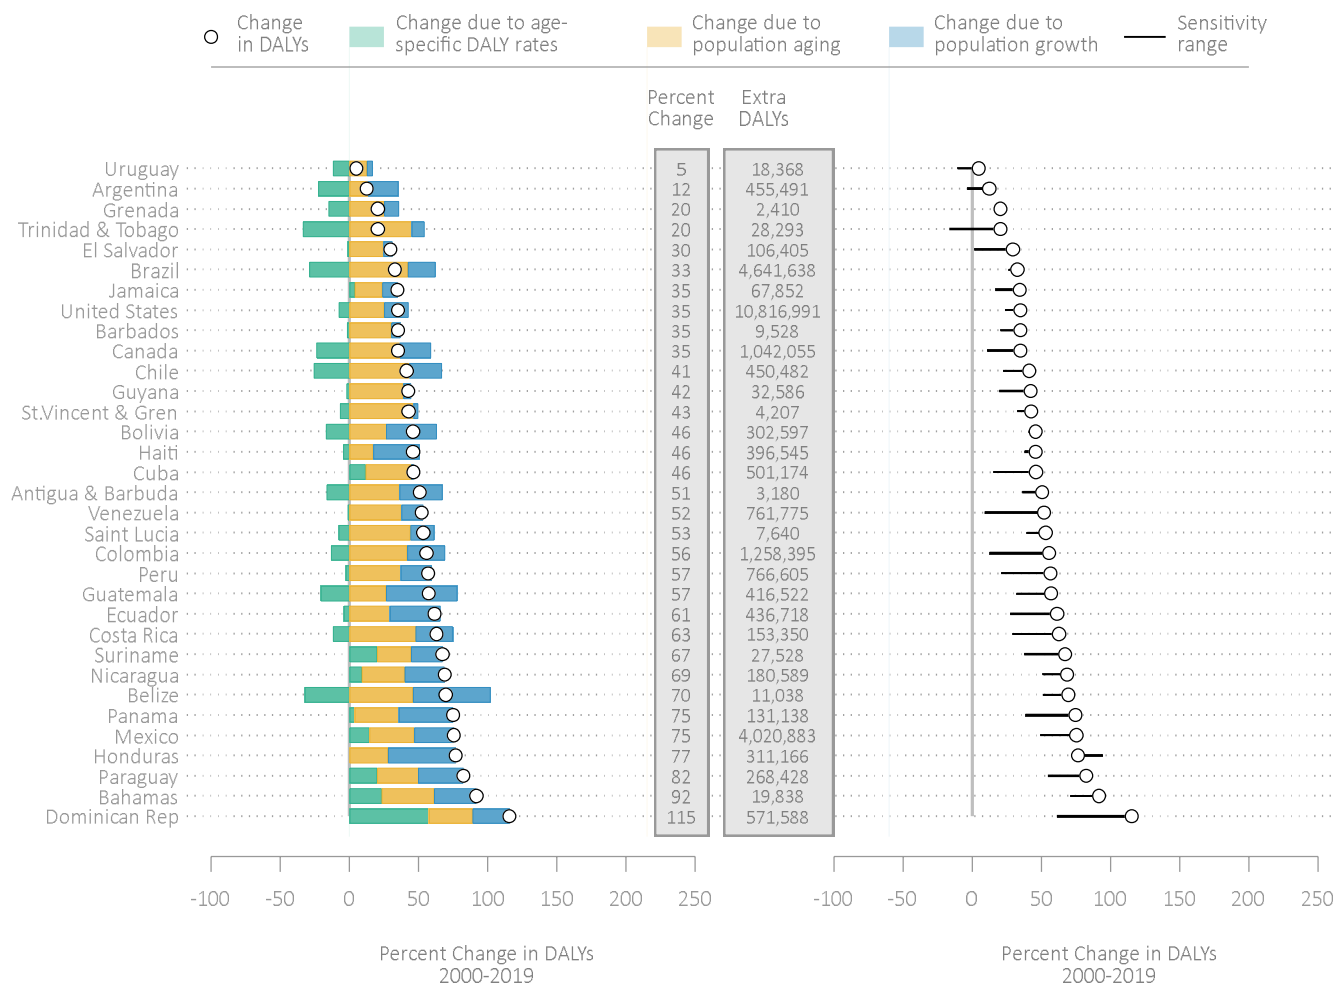

TABLE S11. Deaths/DALYs in 2000 and in 2019, and percentage change in deaths/DALYs between 2000 and 2019, with associated sensitivity ranges. Men only.

| Country           | Deaths or DALYs | Count in 2000 | Count in 2019 | Percentage change (2000 to 2019) | Lower bound of Sensitivity Range | Upper bound of Sensitivity Range |
|-------------------|-----------------|---------------|---------------|----------------------------------|----------------------------------|----------------------------------|
| Antigua & Barbuda | deaths          | 147           | 222           | 50.7                             | 40.9                             | 60.4                             |
| Argentina         | deaths          | 101,492       | 108,861       | 7.3                              | 0.2                              | 14.9                             |
| Bahamas           | deaths          | 455           | 861           | 89.4                             | 72.9                             | 105.0                            |
| Barbados          | deaths          | 802           | 1,093         | 36.4                             | 25.4                             | 49.0                             |
| Belize            | deaths          | 337           | 539           | 60.0                             | 47.2                             | 71.8                             |
| Bolivia           | deaths          | 11,991        | 21,565        | 79.8                             | 76.3                             | 83.0                             |
| Brazil            | deaths          | 306,811       | 438,705       | 43.0                             | 37.0                             | 53.5                             |
| Canada            | deaths          | 89,424        | 112,747       | 26.1                             | 9.3                              | 47.8                             |
| Chile             | deaths          | 25,790        | 37,705        | 46.2                             | 32.3                             | 61.2                             |
| Colombia          | deaths          | 45,555        | 73,981        | 62.4                             | 32.7                             | 97.1                             |
| Costa Rica        | deaths          | 5,149         | 8,036         | 56.1                             | 29.1                             | 87.9                             |
| Cuba              | deaths          | 30,225        | 44,940        | 48.7                             | 23.8                             | 74.4                             |
| Dominican Rep     | deaths          | 9,502         | 23,466        | 147.0                            | 111.0                            | 177.7                            |
| Ecuador           | deaths          | 13,438        | 23,478        | 74.7                             | 51.1                             | 98.4                             |
| El Salvador       | deaths          | 6,277         | 8,968         | 42.9                             | 22.4                             | 64.2                             |
| Grenada           | deaths          | 312           | 359           | 15.2                             | 11.6                             | 17.4                             |
| Guatemala         | deaths          | 11,666        | 19,780        | 69.6                             | 54.1                             | 83.2                             |
| Guyana            | deaths          | 1,532         | 2,371         | 54.8                             | 39.5                             | 67.3                             |
| Haiti             | deaths          | 14,529        | 22,046        | 51.7                             | 47.9                             | 55.0                             |
| Honduras          | deaths          | 5,731         | 13,315        | 132.3                            | 138.5                            | 125.9                            |
| Jamaica           | deaths          | 5,211         | 6,681         | 28.2                             | 15.1                             | 38.5                             |
| LAC               | deaths          | 1,786,848     | 2,453,675     | 37.3                             | 25.1                             | 53.0                             |
| Mexico            | deaths          | 114,696       | 212,458       | 85.2                             | 61.2                             | 111.1                            |
| Nicaragua         | deaths          | 4,611         | 9,121         | 97.8                             | 77.3                             | 115.8                            |
| Panama            | deaths          | 3,664         | 6,592         | 79.9                             | 51.8                             | 109.3                            |
| Paraguay          | deaths          | 5,546         | 11,195        | 101.8                            | 73.8                             | 126.8                            |
| Peru              | deaths          | 20,962        | 39,877        | 90.2                             | 58.3                             | 120.6                            |
| Saint Lucia       | deaths          | 386           | 593           | 53.7                             | 41.8                             | 62.9                             |
| St Vincent & Gren | deaths          | 248           | 326           | 31.5                             | 24.6                             | 37.3                             |
| Suriname          | deaths          | 833           | 1,483         | 78.0                             | 56.1                             | 97.3                             |
| Trinidad & Tobago | deaths          | 3,481         | 3,706         | 6.5                              | -13.2                            | 27.5                             |
| United States     | deaths          | 904,254       | 1,138,914     | 26.0                             | 16.7                             | 39.2                             |
| Uruguay           | deaths          | 11,971        | 12,346        | 3.1                              | -5.0                             | 13.0                             |
| Venezuela         | deaths          | 29,821        | 47,345        | 58.8                             | 29.3                             | 90.3                             |
| Antigua & Barbuda | daly            | 4,645         | 6,782         | 46.0                             | 36.3                             | 50.7                             |
| Argentina         | daly            | 2,938,620     | 3,127,698     | 6.4                              | -3.5                             | 12.5                             |
| Bahamas           | daly            | 16,070        | 29,713        | 84.9                             | 70.9                             | 91.7                             |
| Barbados          | daly            | 20,548        | 26,745        | 30.2                             | 20.7                             | 35.0                             |
| Belize            | daly            | 11,801        | 19,303        | 63.6                             | 51.4                             | 69.5                             |
| Bolivia           | daly            | 426,769       | 617,545       | 44.7                             | 40.7                             | 45.9                             |
| Brazil            | daly            | 11,579,757    | 15,102,912    | 30.4                             | 26.7                             | 32.8                             |
| Canada            | daly            | 2,431,411     | 3,053,843     | 25.6                             | 10.8                             | 35.0                             |
| Chile             | daly            | 849,325       | 1,142,306     | 34.5                             | 22.3                             | 41.2                             |
| Colombia          | daly            | 1,715,391     | 2,417,737     | 40.9                             | 12.5                             | 55.7                             |
| Costa Rica        | daly            | 182,599       | 277,038       | 51.7                             | 29.3                             | 62.8                             |
| Cuba              | daly            | 864,984       | 1,164,830     | 34.7                             | 15.3                             | 46.2                             |
| Dominican Rep     | daly            | 351,705       | 701,312       | 99.4                             | 61.2                             | 115.5                            |
| Ecuador           | daly            | 520,865       | 785,071       | 50.7                             | 27.7                             | 61.4                             |
| El Salvador       | daly            | 265,395       | 319,964       | 20.6                             | 1.6                              | 29.5                             |



|                   |      |            |            |      |       |      |
|-------------------|------|------------|------------|------|-------|------|
| Grenada           | daly | 8,837      | 10,576     | 19.7 | 18.2  | 20.4 |
| Guatemala         | daly | 547,924    | 815,292    | 48.8 | 32.3  | 57.1 |
| Guyana            | daly | 57,369     | 77,357     | 34.8 | 19.5  | 42.4 |
| Haiti             | daly | 534,767    | 772,007    | 44.4 | 37.9  | 45.9 |
| Honduras          | daly | 253,017    | 455,886    | 80.2 | 94.5  | 76.7 |
| Jamaica           | daly | 144,532    | 186,355    | 28.9 | 17.0  | 34.5 |
| LAC               | daly | 57,450,940 | 76,911,042 | 33.9 | 24.1  | 40.0 |
| Mexico            | daly | 4,365,946  | 7,215,580  | 65.3 | 49.4  | 75.4 |
| Nicaragua         | daly | 189,784    | 309,840    | 63.3 | 51.1  | 68.7 |
| Panama            | daly | 130,200    | 212,113    | 62.9 | 38.4  | 74.8 |
| Paraguay          | daly | 230,138    | 401,318    | 74.4 | 55.0  | 82.4 |
| Peru              | daly | 942,997    | 1,382,714  | 46.6 | 21.1  | 56.7 |
| Saint Lucia       | daly | 10,809     | 16,070     | 48.7 | 39.6  | 53.2 |
| St Vincent & Gren | daly | 7,407      | 10,319     | 39.3 | 32.6  | 42.7 |
| Suriname          | daly | 30,239     | 47,688     | 57.7 | 37.8  | 67.2 |
| Trinidad & Tobago | daly | 109,395    | 116,984    | 6.9  | -16.3 | 20.5 |
| United States     | daly | 26,261,956 | 34,227,449 | 30.3 | 23.7  | 35.0 |
| Uruguay           | daly | 309,752    | 306,677    | -1.0 | -10.4 | 4.8  |
| Venezuela         | daly | 1,135,984  | 1,554,021  | 36.8 | 9.2   | 52.0 |
