# Supplementary material
Source: PubMed Central journal article supplement (PMC10090658)
Supplement: mmc3.pdf [file mmc3.pdf]

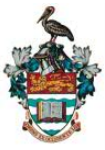

# Population Aging and Noncommunicable Disease in Antigua & Barbuda

Briefing created by Ian Hambleton.

The University of the West Indies.

Updated on: 22 Nov 2022 at 14:22:19

**WHAT IS** the size of the population and the number of older adults in Antigua & Barbuda?

|            |      | Women (n) |        | Men (n)  |       | All (n)  |        |
|------------|------|-----------|--------|----------|-------|----------|--------|
|            |      | All ages  | 70+    | All ages | 70+   | All ages | 70+    |
| Population | 2000 | 40,297    | 1,921  | 35,710   | 1,548 | 76,007   | 3,469  |
|            | 2020 | 50,659    | 3,112  | 47,269   | 2,643 | 97,928   | 5,755  |
|            | 2040 | 56,036    | 7,646  | 53,047   | 6,139 | 109,083  | 13,785 |
|            | 2060 | 56,110    | 10,413 | 54,556   | 8,331 | 110,666  | 18,744 |

**HOW WILL** the proportion of older adults change in the future in Antigua & Barbuda?

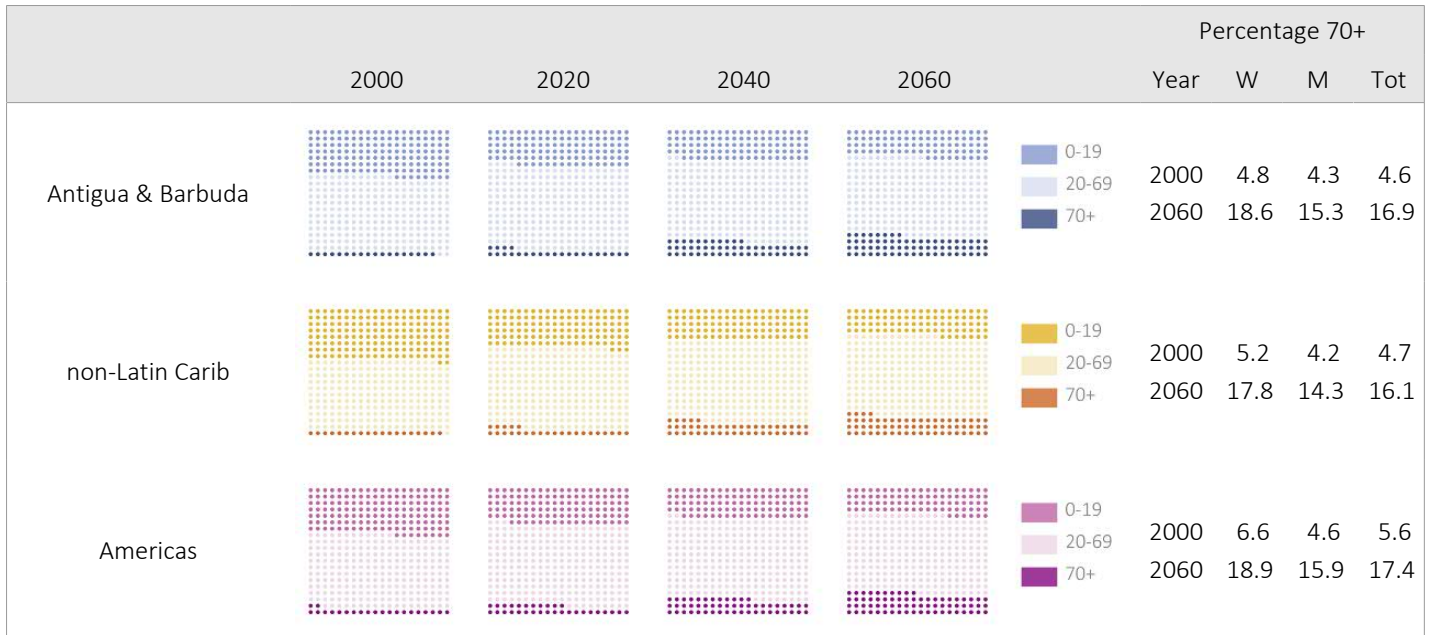

**WHAT ARE** the number of deaths and the mortality rates from noncommunicable disease in Antigua & Barbuda?

|                   |      | Mortality (n) |           |           | Mortality (rate per 100,000) |     |     |
|-------------------|------|---------------|-----------|-----------|------------------------------|-----|-----|
|                   |      | F             | M         | Tot       | F                            | M   | Tot |
| Antigua & Barbuda | 2000 | 162           | 180       | 343       | 464                          | 624 | 536 |
|                   | 2019 | 277           | 276       | 552       | 462                          | 548 | 502 |
| non-Latin Carib   | 2000 | 14,964        | 16,061    | 31,025    | 519                          | 665 | 586 |
|                   | 2019 | 19,239        | 21,211    | 40,450    | 452                          | 579 | 511 |
| Americas          | 2000 | 2,106,791     | 2,107,131 | 4,213,922 | 421                          | 594 | 497 |
|                   | 2019 | 2,861,523     | 2,957,614 | 5,819,137 | 352                          | 483 | 412 |

**HOW HAS** population growth, population aging, and epidemiological change affected the number of deaths in Antigua & Barbuda?

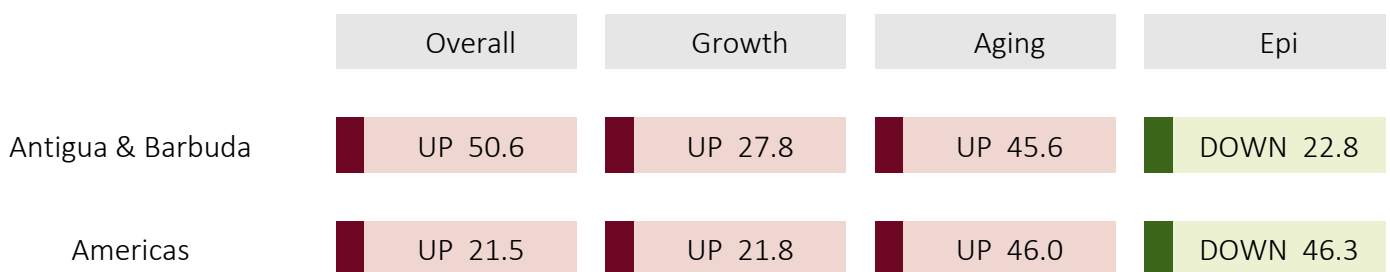

This last chart presents the percentage change in deaths between 2000 and 2019, due to population growth, population aging, and due to *epidemiological change*. This last effect is more accurately called *the change in age-specific mortality rates*, which can be ascribed to changes in the health profile of a population and national health system changes.



# Population Aging and Noncommunicable Disease in Argentina

Briefing created by Ian Hambleton.

The University of the West Indies.

Updated on: 22 Nov 2022 at 14:22:22

**WHAT IS** the size of the population and the number of older adults in Argentina?

|            |      | Women (n)  |           | Men (n)    |           | All (n)    |           |
|------------|------|------------|-----------|------------|-----------|------------|-----------|
|            |      | All ages   | 70+       | All ages   | 70+       | All ages   | 70+       |
| Population | 2000 | 18,976,072 | 1,499,453 | 17,894,724 | 920,422   | 36,870,796 | 2,419,875 |
|            | 2020 | 23,146,632 | 2,139,658 | 22,049,148 | 1,352,518 | 45,195,776 | 3,492,176 |
|            | 2040 | 26,657,156 | 3,199,724 | 25,639,636 | 2,108,507 | 52,296,792 | 5,308,231 |
|            | 2060 | 28,731,964 | 4,777,603 | 27,976,846 | 3,576,687 | 56,708,808 | 8,354,290 |

**HOW WILL** the proportion of older adults change in the future in Argentina?

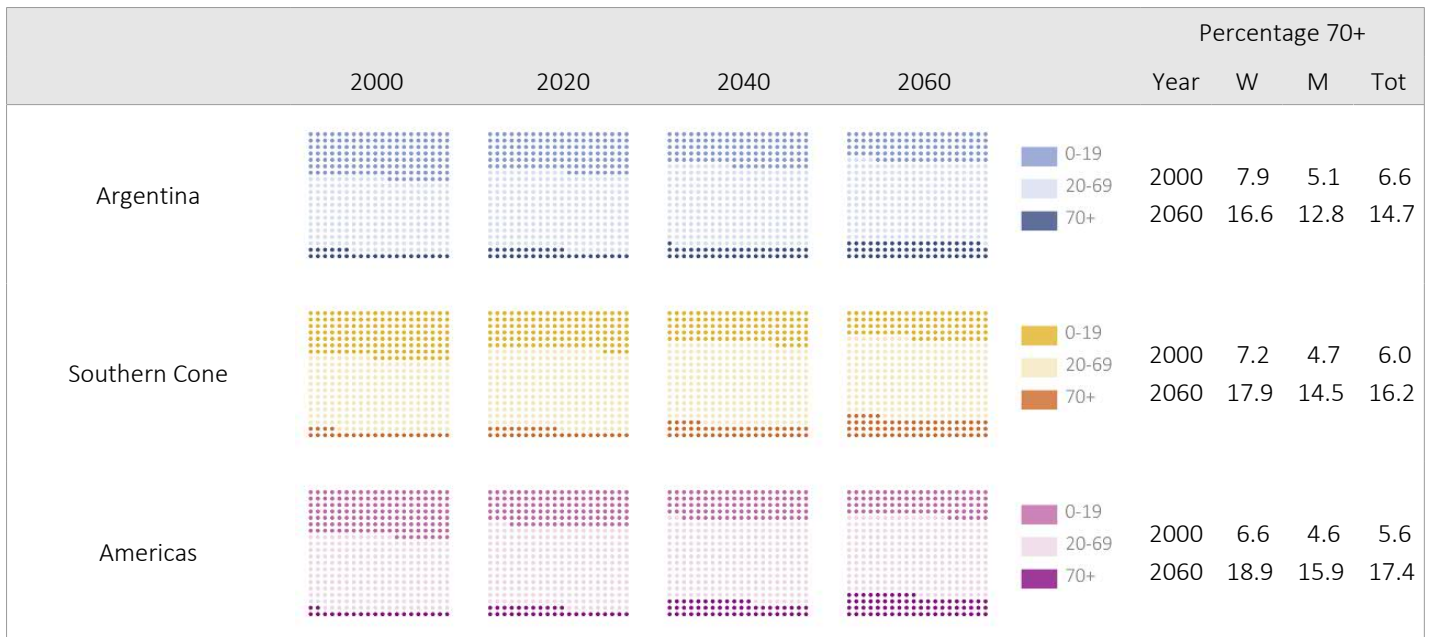

**WHAT ARE** the number of deaths and the mortality rates from noncommunicable disease in Argentina?

|               |      | Mortality (n) |           |           | Mortality (rate per 100,000) |     |     |
|---------------|------|---------------|-----------|-----------|------------------------------|-----|-----|
|               |      | F             | M         | Tot       | F                            | M   | Tot |
| Argentina     | 2000 | 104,787       | 118,883   | 223,670   | 414                          | 717 | 541 |
|               | 2019 | 133,026       | 134,573   | 267,600   | 348                          | 558 | 436 |
| Southern Cone | 2000 | 153,834       | 171,601   | 325,435   | 402                          | 668 | 514 |
|               | 2019 | 205,567       | 210,855   | 416,422   | 328                          | 515 | 408 |
| Americas      | 2000 | 2,106,791     | 2,107,131 | 4,213,922 | 421                          | 594 | 497 |
|               | 2019 | 2,861,523     | 2,957,614 | 5,819,137 | 352                          | 483 | 412 |

**HOW HAS** population growth, population aging, and epidemiological change affected the number of deaths in Argentina?

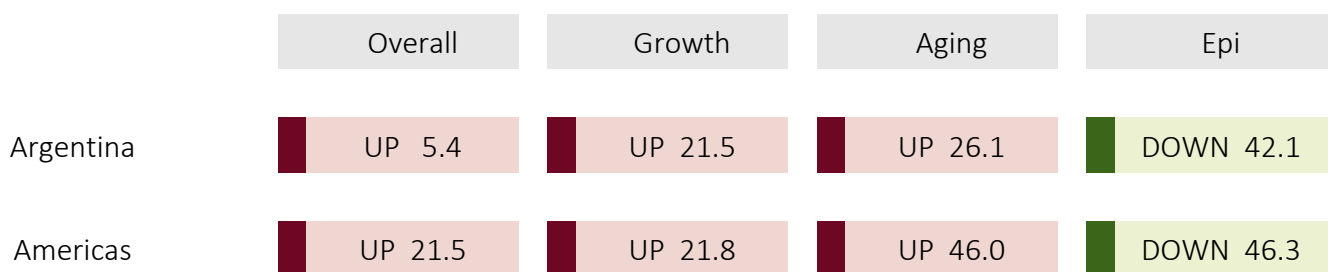

This last chart presents the percentage change in deaths between 2000 and 2019, due to population growth, population aging, and due to *epidemiological change*. This last effect is more accurately called *the change in age-specific mortality rates*, which can be ascribed to changes in the health profile of a population and national health system changes.



# Population Aging and Noncommunicable Disease in Bahamas

Briefing created by Ian Hambleton.

The University of the West Indies.

Updated on: 22 Nov 2022 at 14:22:25

**WHAT IS** the size of the population and the number of older adults in Bahamas?

|            |      | Women (n) |        | Men (n)  |        | All (n)  |        |
|------------|------|-----------|--------|----------|--------|----------|--------|
|            |      | All ages  | 70+    | All ages | 70+    | All ages | 70+    |
| Population | 2000 | 152,870   | 6,046  | 145,175  | 3,987  | 298,045  | 10,033 |
|            | 2020 | 202,155   | 10,709 | 191,093  | 7,917  | 393,248  | 18,626 |
|            | 2040 | 231,197   | 27,263 | 219,263  | 19,528 | 450,460  | 46,791 |
|            | 2060 | 238,920   | 37,531 | 229,370  | 27,013 | 468,290  | 64,544 |

**HOW WILL** the proportion of older adults change in the future in Bahamas?

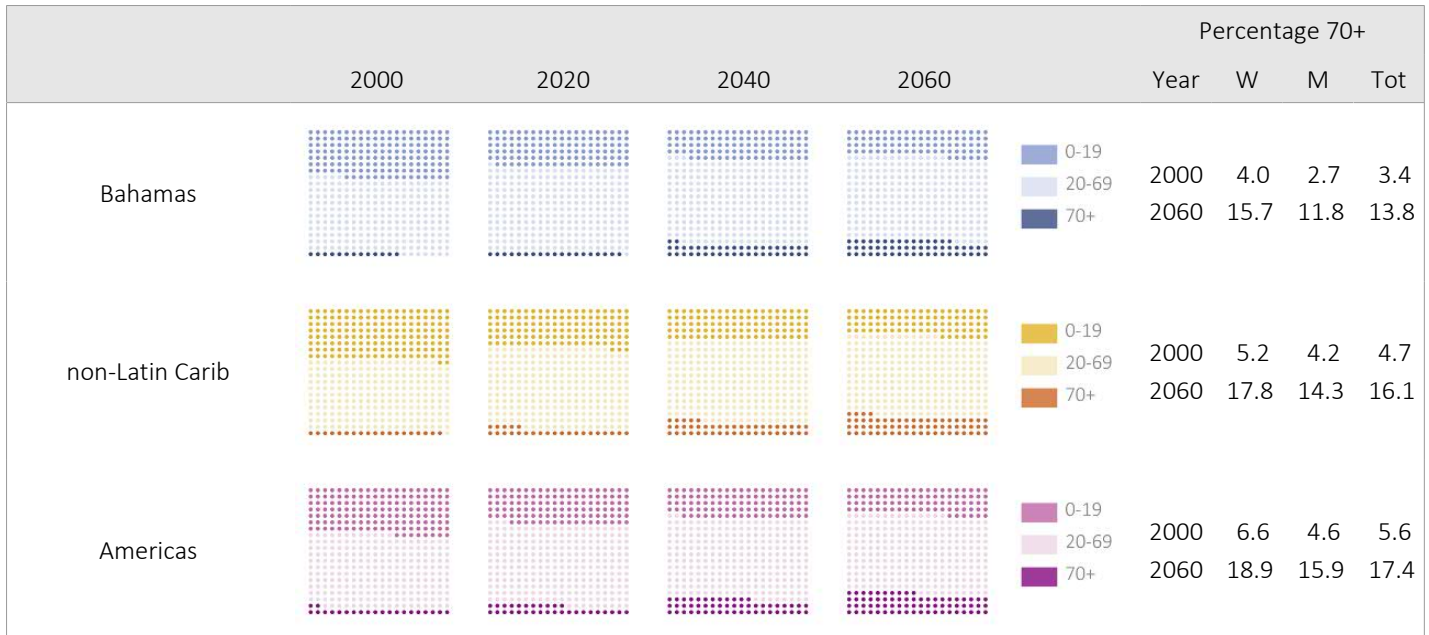

**WHAT ARE** the number of deaths and the mortality rates from noncommunicable disease in Bahamas?

|                 |      | Mortality (n) |           |           | Mortality (rate per 100,000) |     |     |
|-----------------|------|---------------|-----------|-----------|------------------------------|-----|-----|
|                 |      | F             | M         | Tot       | F                            | M   | Tot |
| Bahamas         | 2000 | 567           | 554       | 1,121     | 464                          | 628 | 532 |
|                 | 2019 | 943           | 1,069     | 2,012     | 453                          | 633 | 533 |
| non-Latin Carib | 2000 | 14,964        | 16,061    | 31,025    | 519                          | 665 | 586 |
|                 | 2019 | 19,239        | 21,211    | 40,450    | 452                          | 579 | 511 |
| Americas        | 2000 | 2,106,791     | 2,107,131 | 4,213,922 | 421                          | 594 | 497 |
|                 | 2019 | 2,861,523     | 2,957,614 | 5,819,137 | 352                          | 483 | 412 |

**HOW HAS** population growth, population aging, and epidemiological change affected the number of deaths in Bahamas?

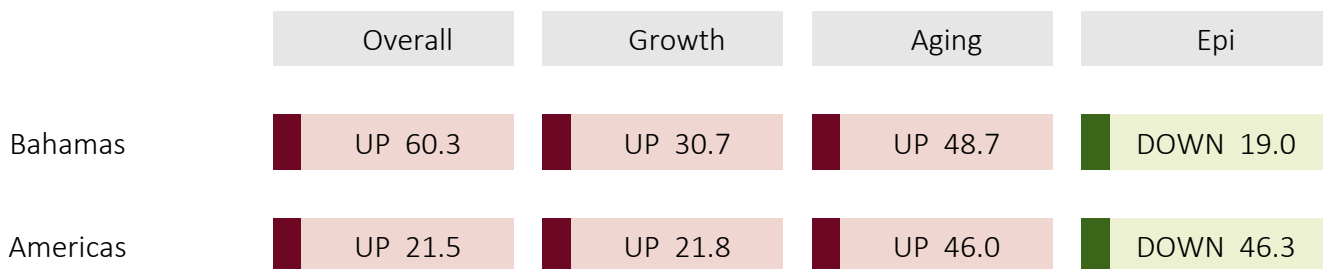

This last chart presents the percentage change in deaths between 2000 and 2019, due to population growth, population aging, and due to *epidemiological change*. This last effect is more accurately called *the change in age-specific mortality rates*, which can be ascribed to changes in the health profile of a population and national health system changes.



# Population Aging and Noncommunicable Disease in Barbados

Briefing created by Ian Hambleton.

The University of the West Indies.

Updated on: 22 Nov 2022 at 14:22:27

**WHAT IS** the size of the population and the number of older adults in Barbados?

|            |      | Women (n) |        | Men (n)  |        | All (n)  |        |
|------------|------|-----------|--------|----------|--------|----------|--------|
|            |      | All ages  | 70+    | All ages | 70+    | All ages | 70+    |
| Population | 2000 | 141,059   | 14,295 | 130,452  | 9,533  | 271,511  | 23,828 |
|            | 2020 | 148,287   | 18,640 | 139,084  | 14,323 | 287,371  | 32,963 |
|            | 2040 | 146,241   | 30,972 | 140,399  | 25,239 | 286,640  | 56,211 |
|            | 2060 | 133,078   | 32,260 | 131,521  | 28,218 | 264,599  | 60,478 |

**HOW WILL** the proportion of older adults change in the future in Barbados?

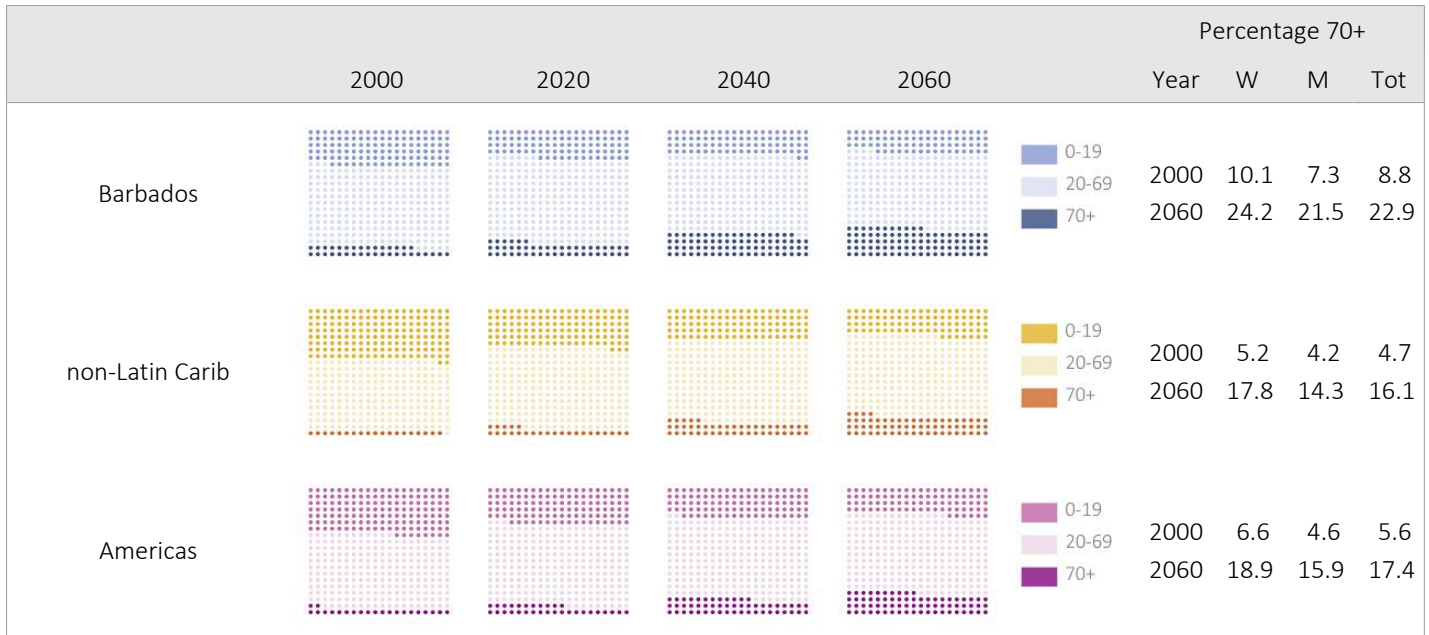

**WHAT ARE** the number of deaths and the mortality rates from noncommunicable disease in Barbados?

|                 |      | Mortality (n) |           |           | Mortality (rate per 100,000) |     |     |
|-----------------|------|---------------|-----------|-----------|------------------------------|-----|-----|
|                 |      | F             | M         | Tot       | F                            | M   | Tot |
| Barbados        | 2000 | 1,177         | 964       | 2,141     | 448                          | 562 | 498 |
|                 | 2019 | 1,475         | 1,357     | 2,832     | 431                          | 533 | 477 |
| non-Latin Carib | 2000 | 14,964        | 16,061    | 31,025    | 519                          | 665 | 586 |
|                 | 2019 | 19,239        | 21,211    | 40,450    | 452                          | 579 | 511 |
| Americas        | 2000 | 2,106,791     | 2,107,131 | 4,213,922 | 421                          | 594 | 497 |
|                 | 2019 | 2,861,523     | 2,957,614 | 5,819,137 | 352                          | 483 | 412 |

**HOW HAS** population growth, population aging, and epidemiological change affected the number of deaths in Barbados?

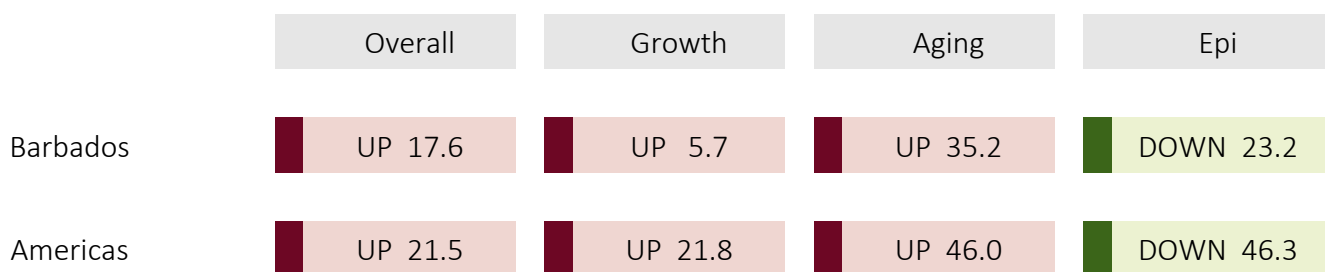

This last chart presents the percentage change in deaths between 2000 and 2019, due to population growth, population aging, and due to *epidemiological change*. This last effect is more accurately called *the change in age-specific mortality rates*, which can be ascribed to changes in the health profile of a population and national health system changes.

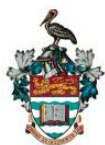

# Population Aging and Noncommunicable Disease in Belize

Briefing created by Ian Hambleton.

The University of the West Indies.

Updated on: 22 Nov 2022 at 14:22:30

**WHAT IS** the size of the population and the number of older adults in Belize?

|            |      | Women (n) |        | Men (n)  |        | All (n)  |        |
|------------|------|-----------|--------|----------|--------|----------|--------|
|            |      | All ages  | 70+    | All ages | 70+    | All ages | 70+    |
| Population | 2000 | 122,794   | 3,239  | 124,516  | 2,998  | 247,310  | 6,237  |
|            | 2020 | 199,860   | 6,191  | 197,761  | 6,358  | 397,621  | 12,549 |
|            | 2040 | 267,195   | 18,202 | 258,961  | 15,597 | 526,156  | 33,799 |
|            | 2060 | 307,825   | 39,606 | 295,585  | 30,451 | 603,410  | 70,057 |

**HOW WILL** the proportion of older adults change in the future in Belize?

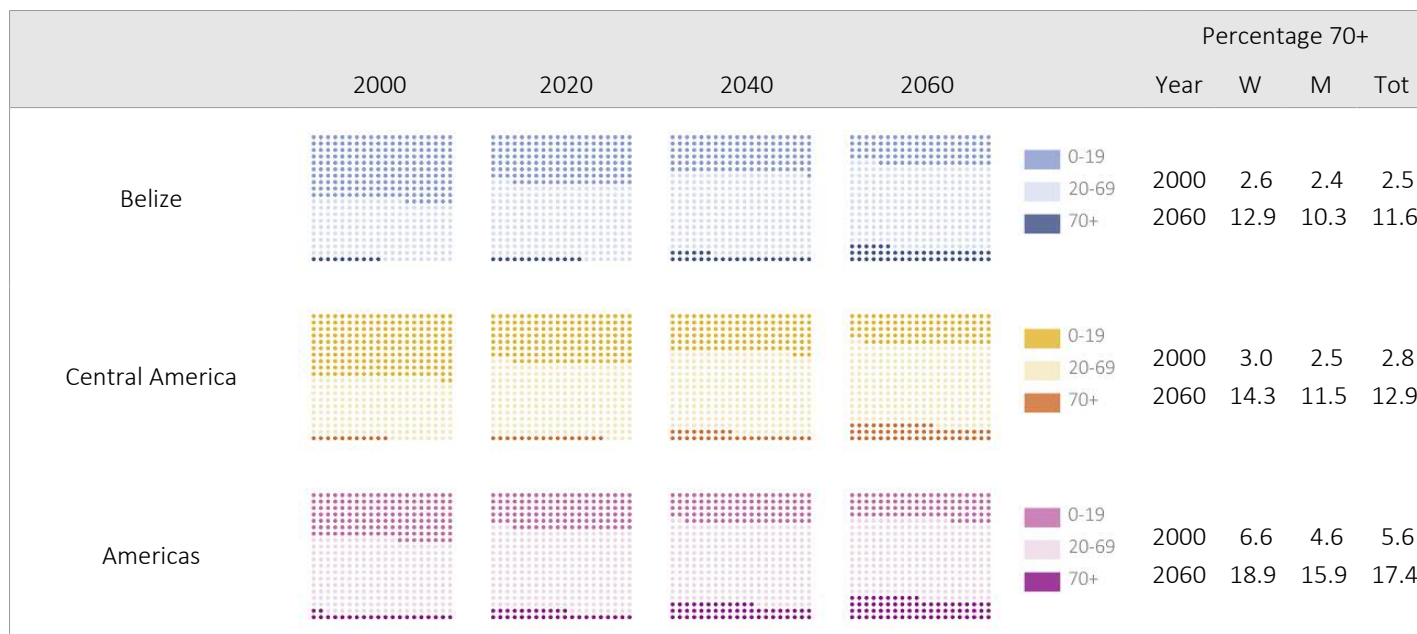

**WHAT ARE** the number of deaths and the mortality rates from noncommunicable disease in Belize?

|                 |      | Mortality (n) |           |           | Mortality (rate per 100,000) |     |     |
|-----------------|------|---------------|-----------|-----------|------------------------------|-----|-----|
|                 |      | F             | M         | Tot       | F                            | M   | Tot |
| Belize          | 2000 | 18,290        | 17,339    | 35,629    | 617                          | 665 | 638 |
|                 | 2019 | 33,396        | 29,412    | 62,808    | 572                          | 599 | 584 |
| Central America | 2000 | 157,087       | 156,463   | 313,550   | 403                          | 486 | 440 |
|                 | 2019 | 260,586       | 259,302   | 519,889   | 326                          | 404 | 361 |
| Americas        | 2000 | 2,106,791     | 2,107,131 | 4,213,922 | 421                          | 594 | 497 |
|                 | 2019 | 2,861,523     | 2,957,614 | 5,819,137 | 352                          | 483 | 412 |

**HOW HAS** population growth, population aging, and epidemiological change affected the number of deaths in Belize?

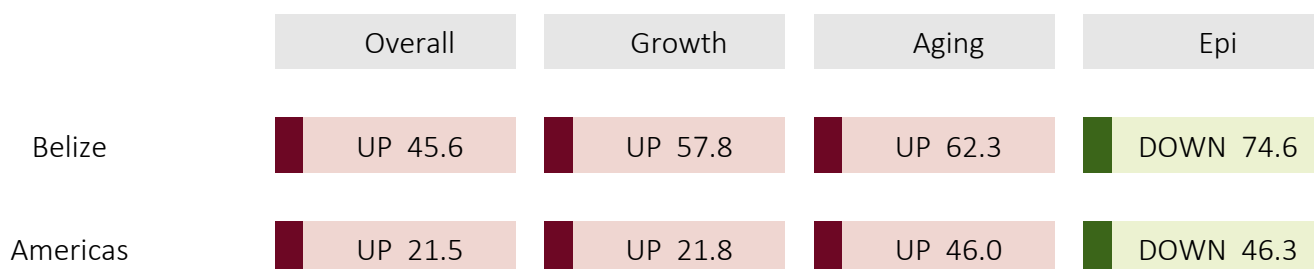

This last chart presents the percentage change in deaths between 2000 and 2019, due to population growth, population aging, and due to *epidemiological change*. This last effect is more accurately called *the change in age-specific mortality rates*, which can be ascribed to changes in the health profile of a population and national health system changes.



# Population Aging and Noncommunicable Disease in Bolivia

Briefing created by Ian Hambleton.

The University of the West Indies.

Updated on: 22 Nov 2022 at 14:22:33

**WHAT IS** the size of the population and the number of older adults in Bolivia?

|            |      | Women (n) |           | Men (n)   |         | All (n)    |           |
|------------|------|-----------|-----------|-----------|---------|------------|-----------|
|            |      | All ages  | 70+       | All ages  | 70+     | All ages   | 70+       |
| Population | 2000 | 4,183,450 | 153,137   | 4,234,820 | 126,708 | 8,418,270  | 279,845   |
|            | 2020 | 5,815,010 | 325,090   | 5,858,019 | 269,770 | 11,673,029 | 594,860   |
|            | 2040 | 7,339,677 | 580,914   | 7,313,427 | 472,919 | 14,653,104 | 1,053,833 |
|            | 2060 | 8,422,506 | 1,026,380 | 8,333,129 | 831,352 | 16,755,635 | 1,857,732 |

**HOW WILL** the proportion of older adults change in the future in Bolivia?

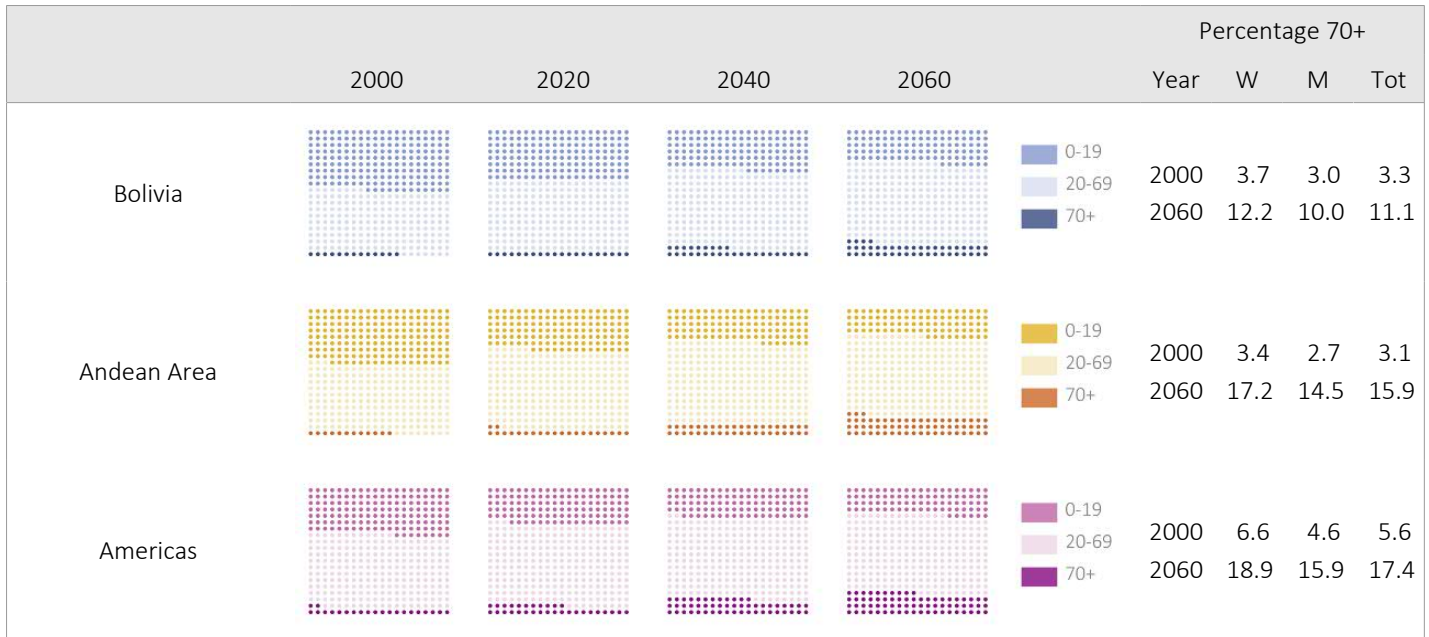

**WHAT ARE** the number of deaths and the mortality rates from noncommunicable disease in Bolivia?

|             |      | Mortality (n) |           |           | Mortality (rate per 100,000) |     |     |
|-------------|------|---------------|-----------|-----------|------------------------------|-----|-----|
|             |      | F             | M         | Tot       | F                            | M   | Tot |
| Bolivia     | 2000 | 314,141       | 371,157   | 685,298   | 482                          | 708 | 583 |
|             | 2019 | 487,105       | 538,603   | 1,025,708 | 351                          | 520 | 425 |
| Andean Area | 2000 | 314,141       | 371,157   | 685,298   | 482                          | 708 | 583 |
|             | 2019 | 487,105       | 538,603   | 1,025,708 | 351                          | 520 | 425 |
| Americas    | 2000 | 2,106,791     | 2,107,131 | 4,213,922 | 421                          | 594 | 497 |
|             | 2019 | 2,861,523     | 2,957,614 | 5,819,137 | 352                          | 483 | 412 |

**HOW HAS** population growth, population aging, and epidemiological change affected the number of deaths in Bolivia?

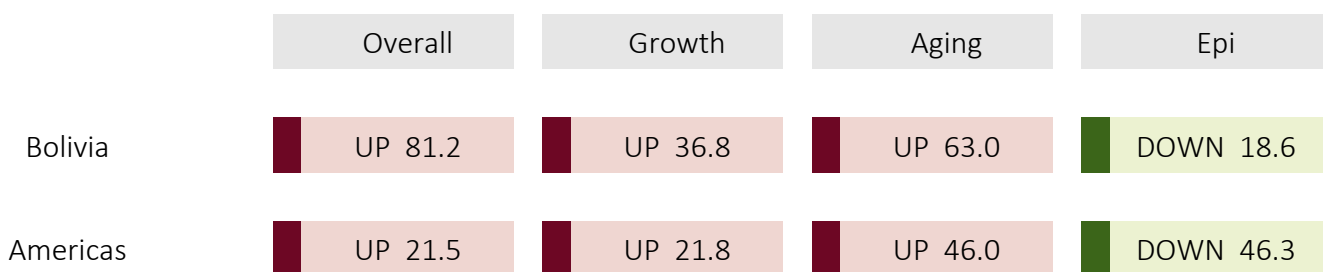

This last chart presents the percentage change in deaths between 2000 and 2019, due to population growth, population aging, and due to *epidemiological change*. This last effect is more accurately called *the change in age-specific mortality rates*, which can be ascribed to changes in the health profile of a population and national health system changes.



# Population Aging and Noncommunicable Disease in Brazil

Briefing created by Ian Hambleton.

The University of the West Indies.

Updated on: 22 Nov 2022 at 14:22:35

**WHAT IS** the size of the population and the number of older adults in Brazil?

|            |      | Women (n)   |            | Men (n)     |            | All (n)     |            |
|------------|------|-------------|------------|-------------|------------|-------------|------------|
|            |      | All ages    | 70+        | All ages    | 70+        | All ages    | 70+        |
| Population | 2000 | 88,208,704  | 3,303,434  | 86,581,632  | 2,413,252  | 174,790,336 | 5,716,686  |
|            | 2020 | 108,123,624 | 7,579,262  | 104,435,784 | 5,381,316  | 212,559,424 | 12,960,578 |
|            | 2040 | 117,168,352 | 16,688,637 | 111,890,528 | 12,138,615 | 229,058,896 | 28,827,252 |
|            | 2060 | 114,624,736 | 25,942,712 | 109,786,896 | 20,179,196 | 224,411,600 | 46,121,904 |

**HOW WILL** the proportion of older adults change in the future in Brazil?

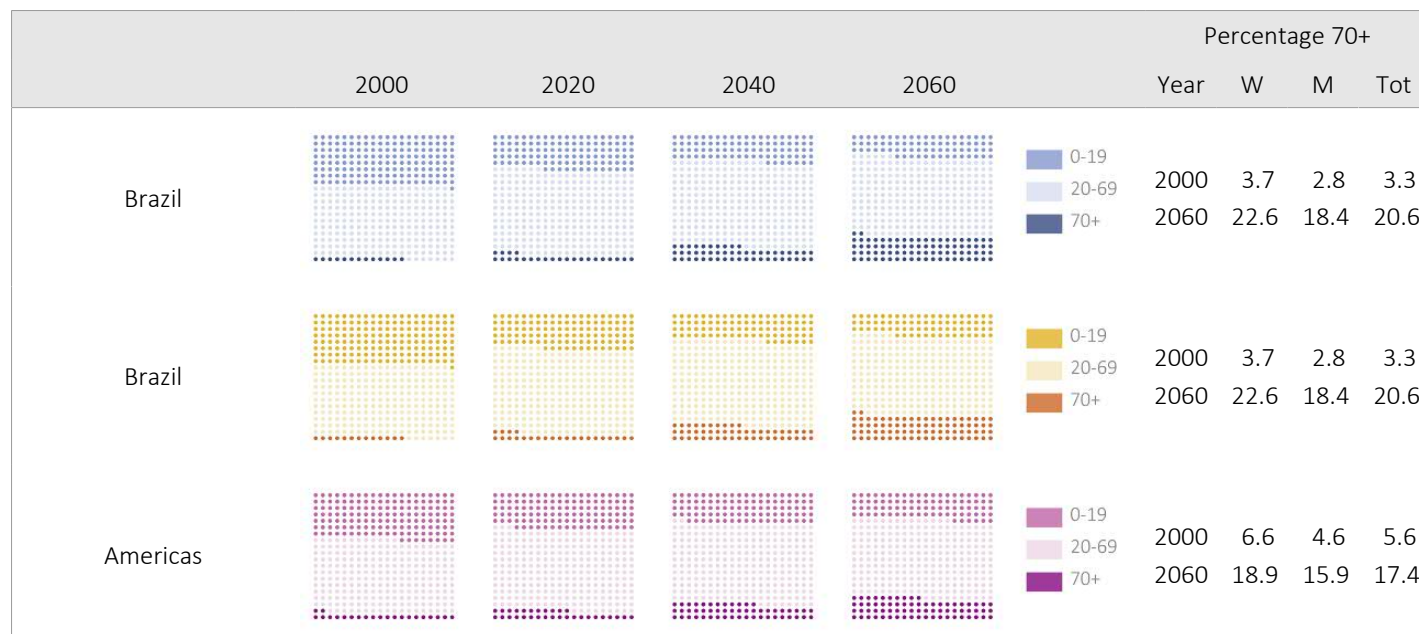

**WHAT ARE** the number of deaths and the mortality rates from noncommunicable disease in Brazil?

|          |      | Mortality (n) |           |           | Mortality (rate per 100,000) |     |     |
|----------|------|---------------|-----------|-----------|------------------------------|-----|-----|
|          |      | F             | M         | Tot       | F                            | M   | Tot |
| Brazil   | 2000 | 342           | 428       | 770       | 521                          | 711 | 613 |
|          | 2019 | 540           | 689       | 1,229     | 397                          | 507 | 452 |
| Americas | 2000 | 49,275        | 53,417    | 102,692   | 432                          | 545 | 484 |
|          | 2019 | 92,270        | 94,934    | 187,203   | 404                          | 518 | 455 |
| Americas | 2000 | 2,106,791     | 2,107,131 | 4,213,922 | 421                          | 594 | 497 |
|          | 2019 | 2,861,523     | 2,957,614 | 5,819,137 | 352                          | 483 | 412 |

**HOW HAS** population growth, population aging, and epidemiological change affected the number of deaths in Brazil?

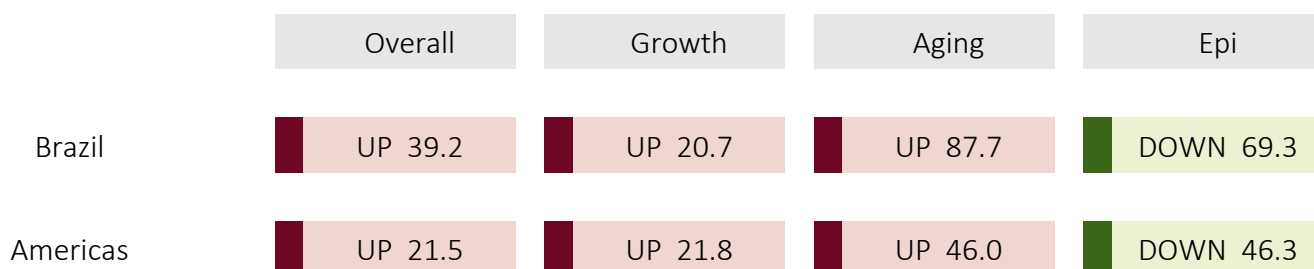

This last chart presents the percentage change in deaths between 2000 and 2019, due to population growth, population aging, and due to *epidemiological change*. This last effect is more accurately called *the change in age-specific mortality rates*, which can be ascribed to changes in the health profile of a population and national health system changes.



# Population Aging and Noncommunicable Disease in Canada

Briefing created by Ian Hambleton.

The University of the West Indies.

Updated on: 22 Nov 2022 at 14:22:38

**WHAT IS** the size of the population and the number of older adults in Canada?

|            |      | Women (n)  |           | Men (n)    |           | All (n)    |           |
|------------|------|------------|-----------|------------|-----------|------------|-----------|
|            |      | All ages   | 70+       | All ages   | 70+       | All ages   | 70+       |
| Population | 2000 | 15,436,061 | 1,605,311 | 15,152,318 | 1,096,849 | 30,588,382 | 2,702,160 |
|            | 2020 | 19,009,980 | 2,583,736 | 18,732,176 | 2,099,059 | 37,742,160 | 4,682,795 |
|            | 2040 | 21,859,612 | 4,411,381 | 21,626,662 | 3,831,621 | 43,486,268 | 8,243,002 |
|            | 2060 | 23,955,388 | 5,173,673 | 23,824,072 | 4,521,010 | 47,779,464 | 9,694,683 |

**HOW WILL** the proportion of older adults change in the future in Canada?

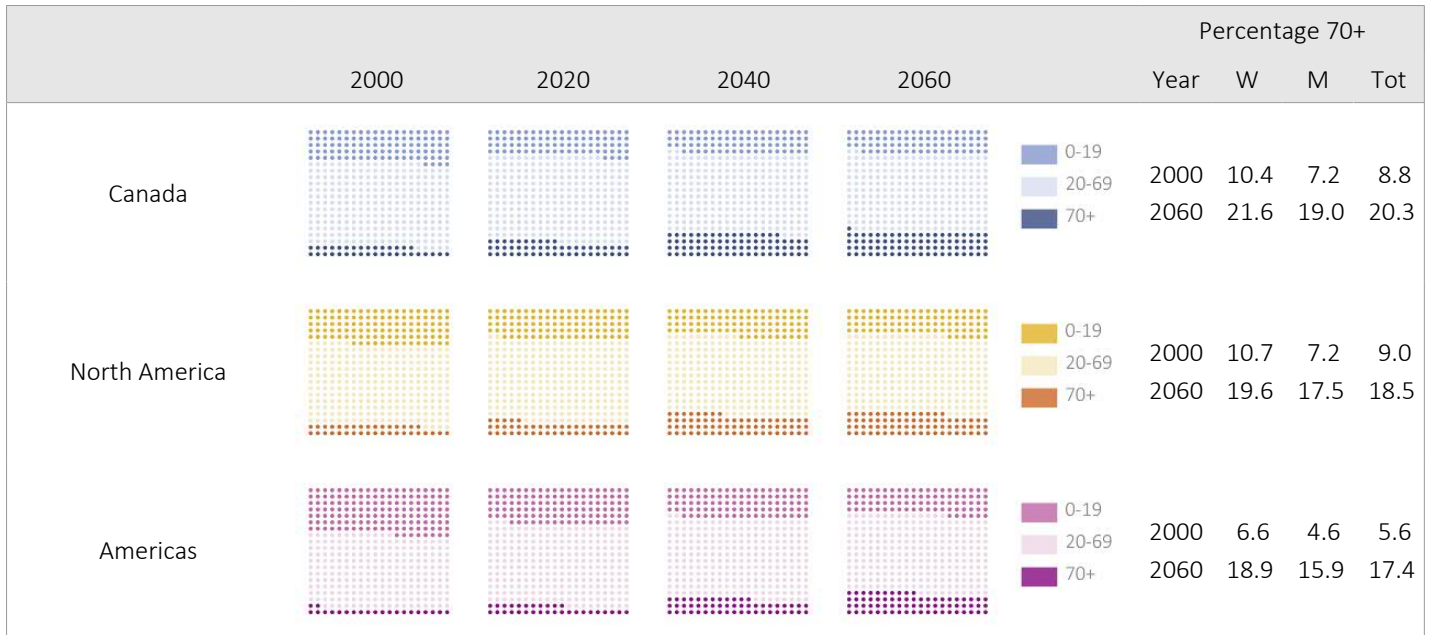

**WHAT ARE** the number of deaths and the mortality rates from noncommunicable disease in Canada?

|               |      | Mortality (n) |           |           | Mortality (rate per 100,000) |     |     |
|---------------|------|---------------|-----------|-----------|------------------------------|-----|-----|
|               |      | F             | M         | Tot       | F                            | M   | Tot |
| Canada        | 2000 | 97,003        | 98,742    | 195,746   | 334                          | 512 | 410 |
|               | 2019 | 123,481       | 126,349   | 249,830   | 255                          | 355 | 302 |
| North America | 2000 | 1,201,371     | 1,106,712 | 2,308,083 | 398                          | 574 | 475 |
|               | 2019 | 1,422,112     | 1,427,303 | 2,849,414 | 338                          | 462 | 397 |
| Americas      | 2000 | 2,106,791     | 2,107,131 | 4,213,922 | 421                          | 594 | 497 |
|               | 2019 | 2,861,523     | 2,957,614 | 5,819,137 | 352                          | 483 | 412 |

**HOW HAS** population growth, population aging, and epidemiological change affected the number of deaths in Canada?

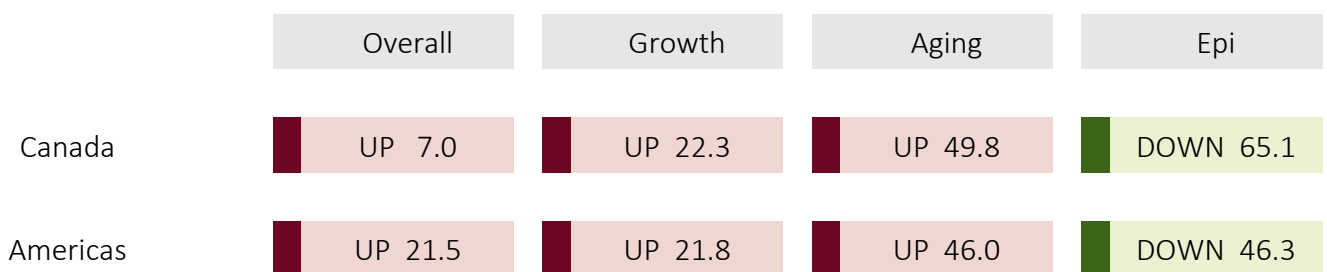

This last chart presents the percentage change in deaths between 2000 and 2019, due to population growth, population aging, and due to *epidemiological change*. This last effect is more accurately called *the change in age-specific mortality rates*, which can be ascribed to changes in the health profile of a population and national health system changes.





# Population Aging and Noncommunicable Disease in Chile

Briefing created by Ian Hambleton.

The University of the West Indies.

Updated on: 22 Nov 2022 at 14:22:41

**WHAT IS** the size of the population and the number of older adults in Chile?

|            |      | Women (n)  |           | Men (n)   |           | All (n)    |           |
|------------|------|------------|-----------|-----------|-----------|------------|-----------|
|            |      | All ages   | 70+       | All ages  | 70+       | All ages   | 70+       |
| Population | 2000 | 7,794,185  | 457,865   | 7,548,165 | 302,518   | 15,342,350 | 760,383   |
|            | 2020 | 9,690,540  | 896,627   | 9,425,669 | 634,220   | 19,116,208 | 1,530,847 |
|            | 2040 | 10,180,885 | 1,751,418 | 9,975,756 | 1,426,234 | 20,156,644 | 3,177,652 |
|            | 2060 | 10,105,944 | 2,387,471 | 9,969,325 | 2,074,050 | 20,075,268 | 4,461,521 |

**HOW WILL** the proportion of older adults change in the future in Chile?

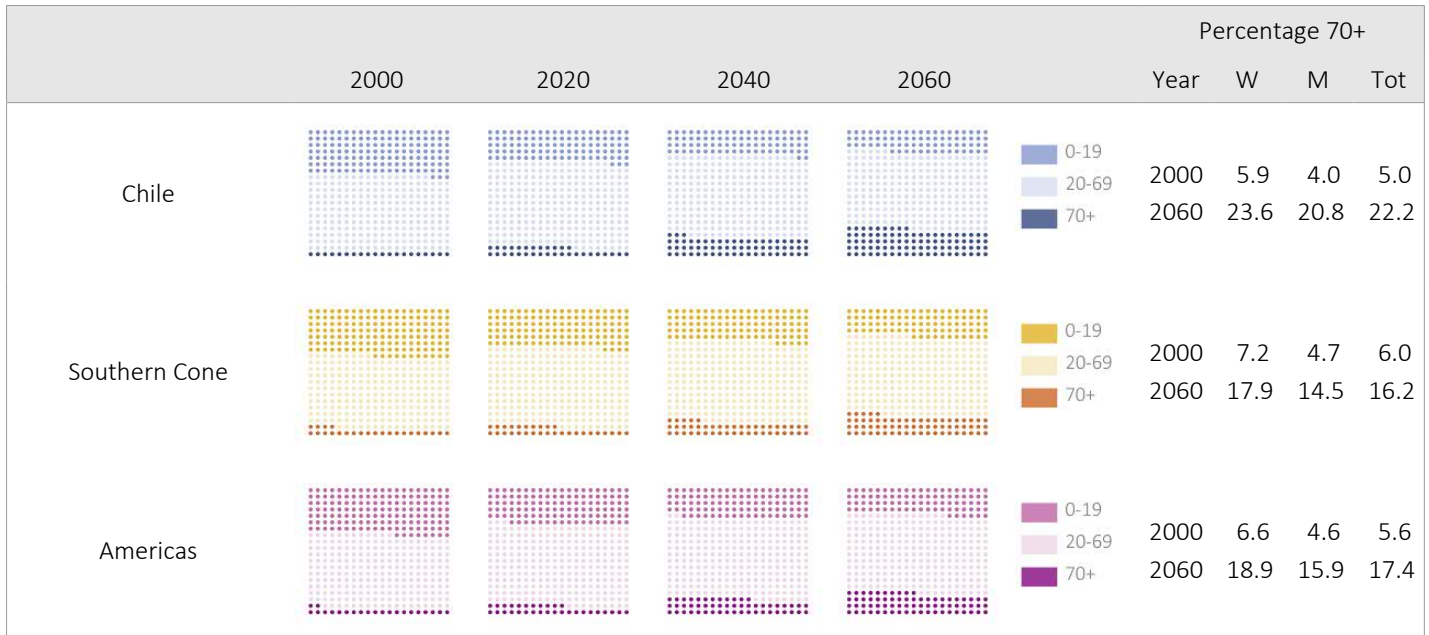

**WHAT ARE** the number of deaths and the mortality rates from noncommunicable disease in Chile?

|               |      | Mortality (n) |           |           | Mortality (rate per 100,000) |     |     |
|---------------|------|---------------|-----------|-----------|------------------------------|-----|-----|
|               |      | F             | M         | Tot       | F                            | M   | Tot |
| Chile         | 2000 | 30,176        | 32,157    | 62,333    | 369                          | 564 | 450 |
|               | 2019 | 46,004        | 47,274    | 93,278    | 271                          | 404 | 329 |
| Southern Cone | 2000 | 153,834       | 171,601   | 325,435   | 402                          | 668 | 514 |
|               | 2019 | 205,567       | 210,855   | 416,422   | 328                          | 515 | 408 |
| Americas      | 2000 | 2,106,791     | 2,107,131 | 4,213,922 | 421                          | 594 | 497 |
|               | 2019 | 2,861,523     | 2,957,614 | 5,819,137 | 352                          | 483 | 412 |

**HOW HAS** population growth, population aging, and epidemiological change affected the number of deaths in Chile?

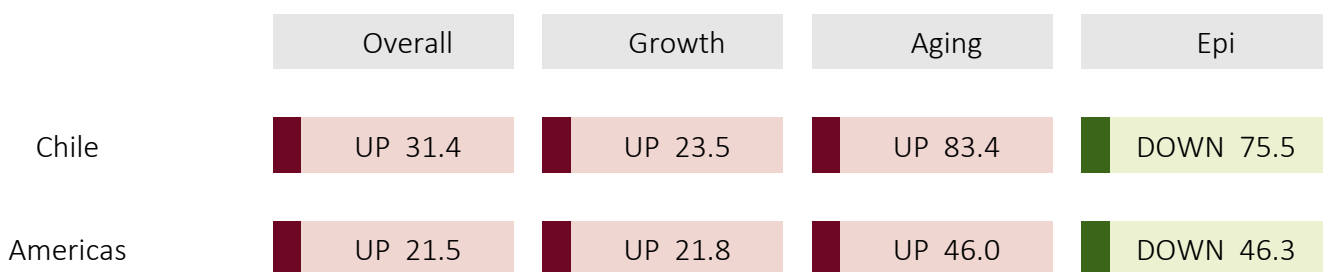

This last chart presents the percentage change in deaths between 2000 and 2019, due to population growth, population aging, and due to *epidemiological change*. This last effect is more accurately called *the change in age-specific mortality rates*, which can be ascribed to changes in the health profile of a population and national health system changes.



# Population Aging and Noncommunicable Disease in Colombia

Briefing created by Ian Hambleton.

The University of the West Indies.

Updated on: 22 Nov 2022 at 14:22:44

**WHAT IS** the size of the population and the number of older adults in Colombia?

|            |      | Women (n)  |           | Men (n)    |           | All (n)    |            |
|------------|------|------------|-----------|------------|-----------|------------|------------|
|            |      | All ages   | 70+       | All ages   | 70+       | All ages   | 70+        |
| Population | 2000 | 20,202,660 | 726,641   | 19,427,306 | 565,060   | 39,629,968 | 1,291,701  |
|            | 2020 | 25,898,320 | 1,652,635 | 24,984,564 | 1,272,733 | 50,882,884 | 2,925,368  |
|            | 2040 | 28,171,816 | 3,797,257 | 27,164,210 | 2,923,697 | 55,336,028 | 6,720,954  |
|            | 2060 | 28,014,920 | 5,770,401 | 27,392,954 | 4,771,886 | 55,407,880 | 10,542,287 |

**HOW WILL** the proportion of older adults change in the future in Colombia?

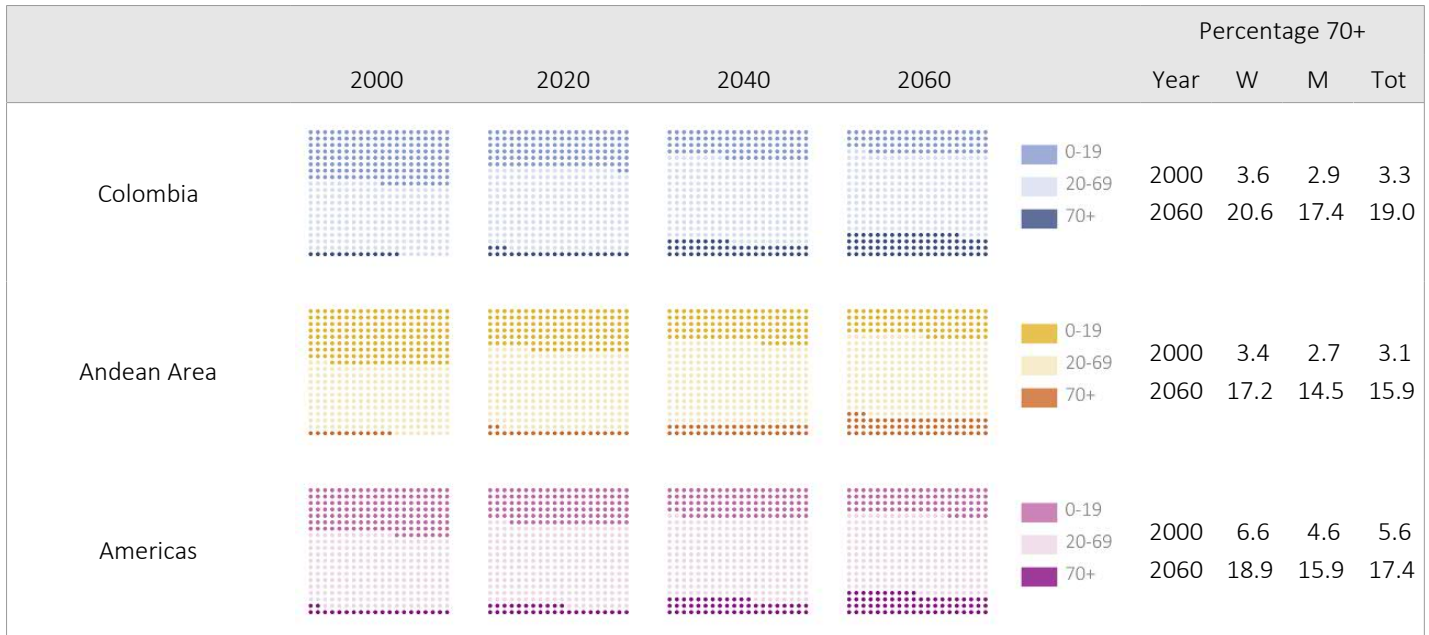

**WHAT ARE** the number of deaths and the mortality rates from noncommunicable disease in Colombia?

|             |      | Mortality (n) |           |           | Mortality (rate per 100,000) |     |     |
|-------------|------|---------------|-----------|-----------|------------------------------|-----|-----|
|             |      | F             | M         | Tot       | F                            | M   | Tot |
| Colombia    | 2000 | 56,721        | 54,633    | 111,354   | 390                          | 467 | 423 |
|             | 2019 | 91,546        | 89,539    | 181,086   | 293                          | 371 | 327 |
| Andean Area | 2000 | 157,087       | 156,463   | 313,550   | 403                          | 486 | 440 |
|             | 2019 | 260,586       | 259,302   | 519,889   | 326                          | 404 | 361 |
| Americas    | 2000 | 2,106,791     | 2,107,131 | 4,213,922 | 421                          | 594 | 497 |
|             | 2019 | 2,861,523     | 2,957,614 | 5,819,137 | 352                          | 483 | 412 |

**HOW HAS** population growth, population aging, and epidemiological change affected the number of deaths in Colombia?

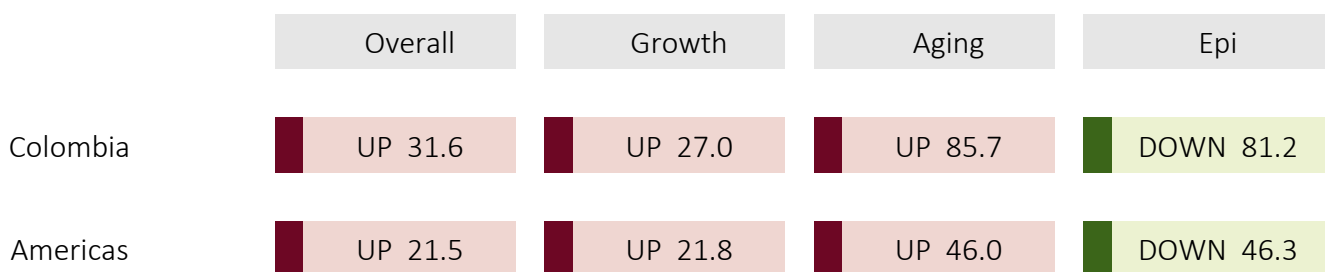

This last chart presents the percentage change in deaths between 2000 and 2019, due to population growth, population aging, and due to *epidemiological change*. This last effect is more accurately called *the change in age-specific mortality rates*, which can be ascribed to changes in the health profile of a population and national health system changes.



# Population Aging and Noncommunicable Disease in Costa Rica

Briefing created by Ian Hambleton.

The University of the West Indies.

Updated on: 22 Nov 2022 at 14:22:47

**WHAT IS** the size of the population and the number of older adults in Costa Rica?

|            |      | Women (n) |         | Men (n)   |         | All (n)   |           |
|------------|------|-----------|---------|-----------|---------|-----------|-----------|
|            |      | All ages  | 70+     | All ages  | 70+     | All ages  | 70+       |
| Population | 2000 | 1,973,722 | 78,206  | 1,988,647 | 62,913  | 3,962,369 | 141,119   |
|            | 2020 | 2,549,038 | 187,384 | 2,545,076 | 156,219 | 5,094,114 | 343,603   |
|            | 2040 | 2,857,547 | 440,454 | 2,834,439 | 370,327 | 5,691,986 | 810,781   |
|            | 2060 | 2,873,017 | 673,303 | 2,851,030 | 586,450 | 5,724,047 | 1,259,753 |

**HOW WILL** the proportion of older adults change in the future in Costa Rica?

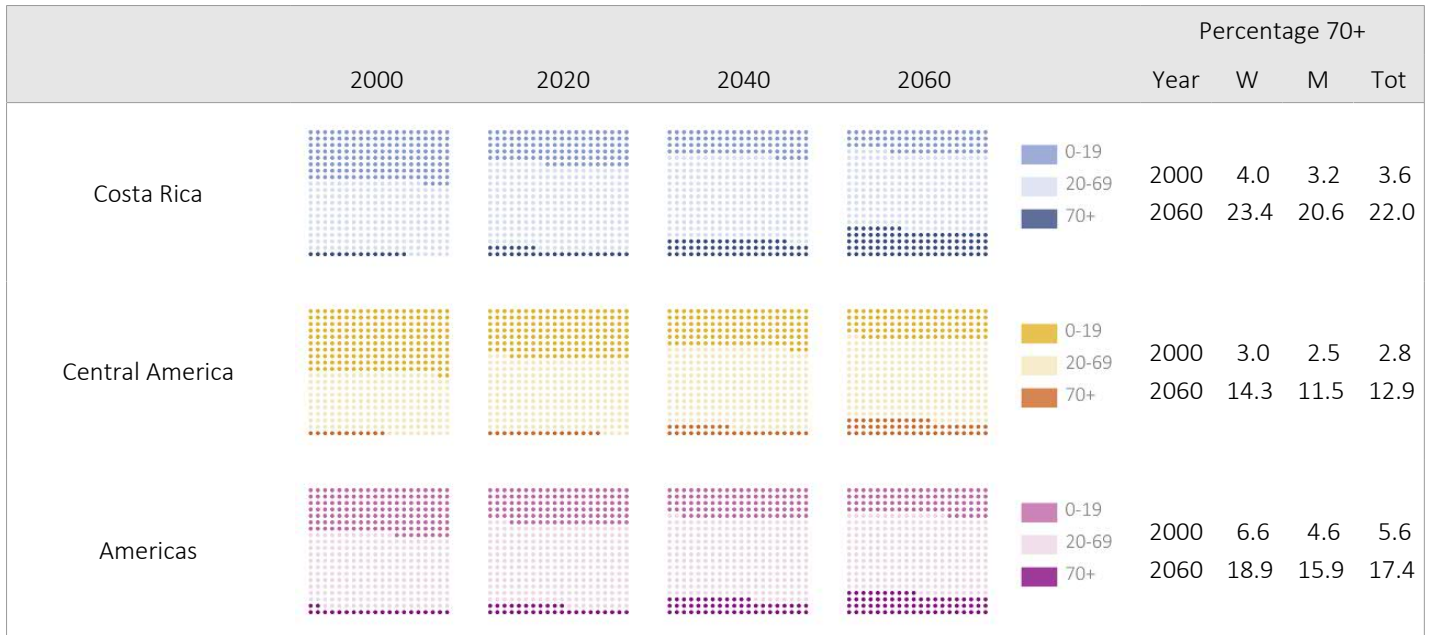

**WHAT ARE** the number of deaths and the mortality rates from noncommunicable disease in Costa Rica?

|                 |      | Mortality (n) |           |           | Mortality (rate per 100,000) |     |     |
|-----------------|------|---------------|-----------|-----------|------------------------------|-----|-----|
|                 |      | F             | M         | Tot       | F                            | M   | Tot |
| Costa Rica      | 2000 | 5,379         | 6,412     | 11,791    | 342                          | 495 | 411 |
|                 | 2019 | 9,142         | 10,443    | 19,585    | 264                          | 363 | 310 |
| Central America | 2000 | 49,275        | 53,417    | 102,692   | 432                          | 545 | 484 |
|                 | 2019 | 92,270        | 94,934    | 187,203   | 404                          | 518 | 455 |
| Americas        | 2000 | 2,106,791     | 2,107,131 | 4,213,922 | 421                          | 594 | 497 |
|                 | 2019 | 2,861,523     | 2,957,614 | 5,819,137 | 352                          | 483 | 412 |

**HOW HAS** population growth, population aging, and epidemiological change affected the number of deaths in Costa Rica?

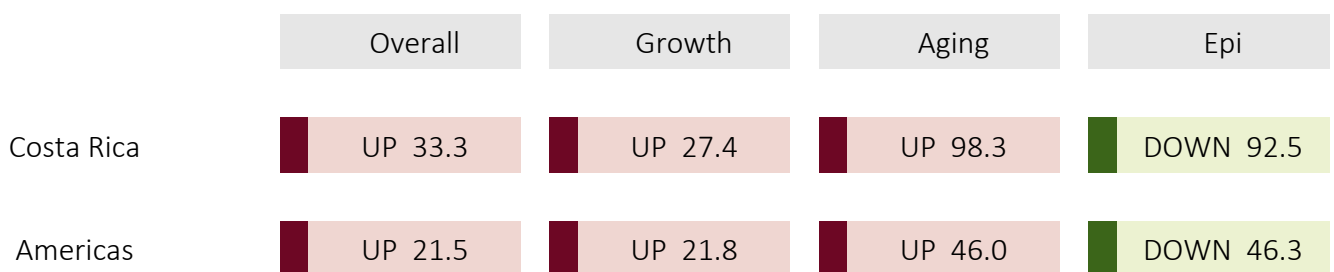

This last chart presents the percentage change in deaths between 2000 and 2019, due to population growth, population aging, and due to *epidemiological change*. This last effect is more accurately called *the change in age-specific mortality rates*, which can be ascribed to changes in the health profile of a population and national health system changes.

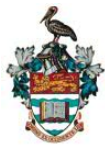

# Population Aging and Noncommunicable Disease in Cuba

Briefing created by Ian Hambleton.

The University of the West Indies.

Updated on: 22 Nov 2022 at 14:22:49

**WHAT IS** the size of the population and the number of older adults in Cuba?

|            |      | Women (n) |           | Men (n)   |           | All (n)    |           |
|------------|------|-----------|-----------|-----------|-----------|------------|-----------|
|            |      | All ages  | 70+       | All ages  | 70+       | All ages   | 70+       |
| Population | 2000 | 5,579,325 | 410,913   | 5,547,098 | 348,794   | 11,126,423 | 759,707   |
|            | 2020 | 5,703,148 | 679,911   | 5,623,468 | 553,246   | 11,326,616 | 1,233,157 |
|            | 2040 | 5,421,941 | 1,257,671 | 5,342,809 | 1,029,046 | 10,764,750 | 2,286,717 |
|            | 2060 | 4,678,949 | 1,280,518 | 4,703,517 | 1,136,208 | 9,382,466  | 2,416,726 |

**HOW WILL** the proportion of older adults change in the future in Cuba?

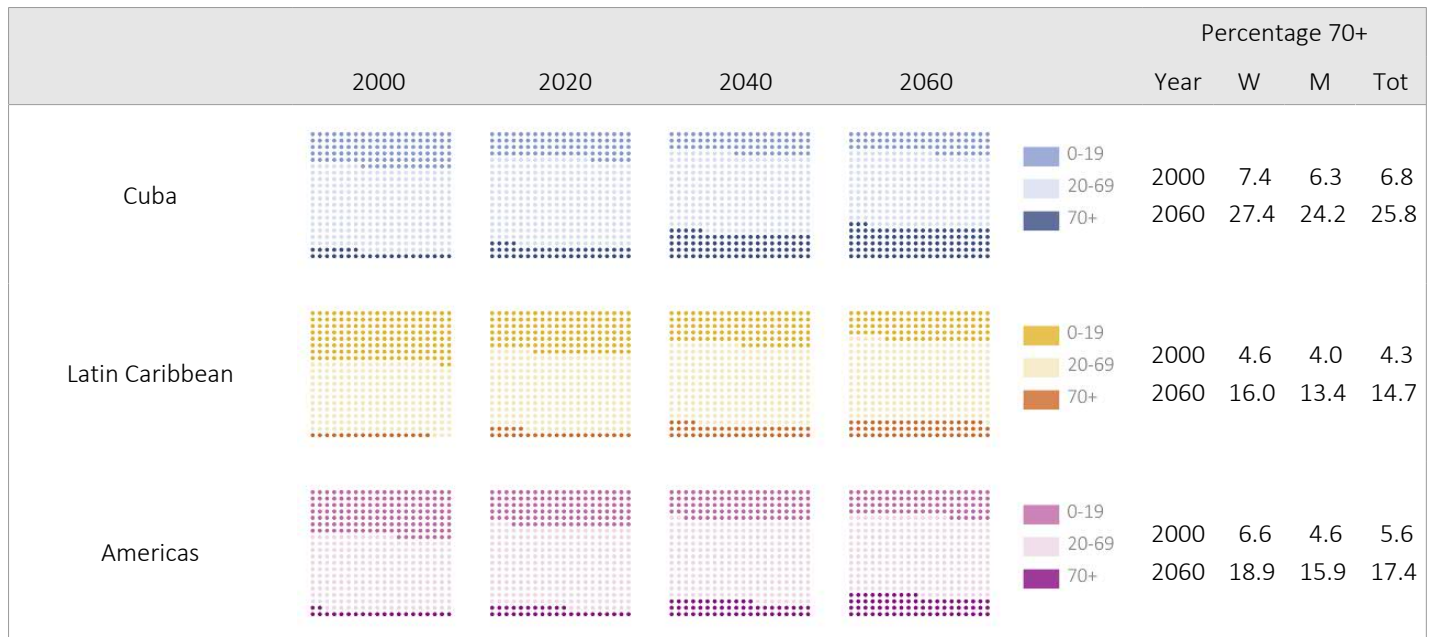

**WHAT ARE** the number of deaths and the mortality rates from noncommunicable disease in Cuba?

|                 |      | Mortality (n) |           |           | Mortality (rate per 100,000) |     |     |
|-----------------|------|---------------|-----------|-----------|------------------------------|-----|-----|
|                 |      | F             | M         | Tot       | F                            | M   | Tot |
| Cuba            | 2000 | 28,657        | 33,390    | 62,047    | 387                          | 524 | 452 |
|                 | 2019 | 42,147        | 50,175    | 92,323    | 354                          | 520 | 431 |
| Latin Caribbean | 2000 | 62,037        | 64,329    | 126,367   | 499                          | 582 | 537 |
|                 | 2019 | 101,680       | 105,926   | 207,606   | 489                          | 604 | 542 |
| Americas        | 2000 | 2,106,791     | 2,107,131 | 4,213,922 | 421                          | 594 | 497 |
|                 | 2019 | 2,861,523     | 2,957,614 | 5,819,137 | 352                          | 483 | 412 |

**HOW HAS** population growth, population aging, and epidemiological change affected the number of deaths in Cuba?

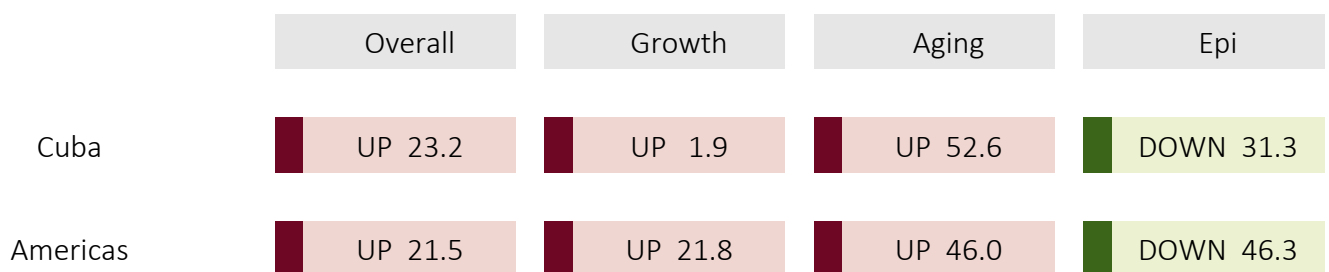

This last chart presents the percentage change in deaths between 2000 and 2019, due to population growth, population aging, and due to *epidemiological change*. This last effect is more accurately called *the change in age-specific mortality rates*, which can be ascribed to changes in the health profile of a population and national health system changes.



# Population Aging and Noncommunicable Disease in Dominican Republic

Briefing created by Ian Hambleton.

The University of the West Indies.

Updated on: 22 Nov 2022 at 14:22:52

**WHAT IS** the size of the population and the number of older adults in Dominican Republic?

|            |      | Women (n) |           | Men (n)   |         | All (n)    |           |
|------------|------|-----------|-----------|-----------|---------|------------|-----------|
|            |      | All ages  | 70+       | All ages  | 70+     | All ages   | 70+       |
| Population | 2000 | 4,226,670 | 125,038   | 4,244,647 | 121,069 | 8,471,317  | 246,107   |
|            | 2020 | 5,429,698 | 283,351   | 5,418,206 | 239,668 | 10,847,904 | 523,019   |
|            | 2040 | 6,260,231 | 631,169   | 6,156,256 | 496,237 | 12,416,487 | 1,127,406 |
|            | 2060 | 6,510,879 | 1,020,847 | 6,374,585 | 801,139 | 12,885,464 | 1,821,986 |

**HOW WILL** the proportion of older adults change in the future in Dominican Republic?

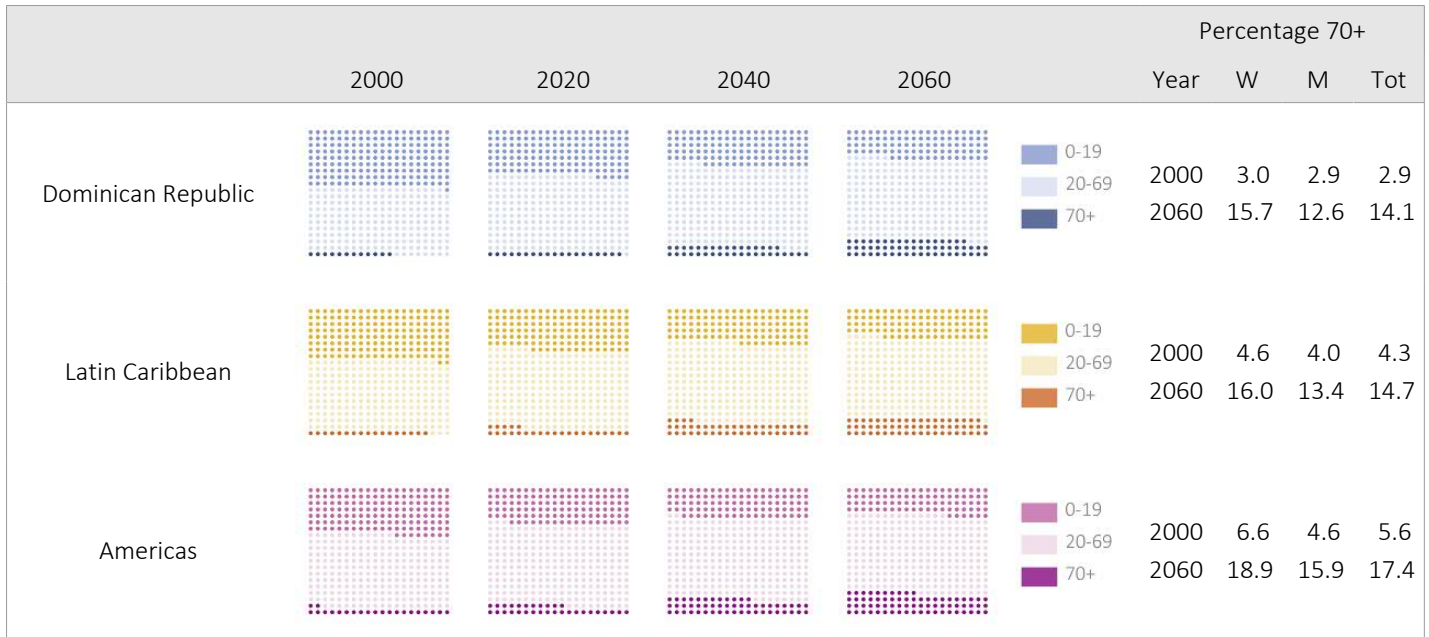

**WHAT ARE** the number of deaths and the mortality rates from noncommunicable disease in Dominican Republic?

|                    |      | Mortality (n) |           |           | Mortality (rate per 100,000) |     |     |
|--------------------|------|---------------|-----------|-----------|------------------------------|-----|-----|
|                    |      | F             | M         | Tot       | F                            | M   | Tot |
| Dominican Republic | 2000 | 8,600         | 12,005    | 20,605    | 322                          | 471 | 395 |
|                    | 2019 | 24,645        | 27,763    | 52,409    | 442                          | 581 | 508 |
| Latin Caribbean    | 2000 | 62,037        | 64,329    | 126,367   | 499                          | 582 | 537 |
|                    | 2019 | 101,680       | 105,926   | 207,606   | 489                          | 604 | 542 |
| Americas           | 2000 | 2,106,791     | 2,107,131 | 4,213,922 | 421                          | 594 | 497 |
|                    | 2019 | 2,861,523     | 2,957,614 | 5,819,137 | 352                          | 483 | 412 |

**HOW HAS** population growth, population aging, and epidemiological change affected the number of deaths in Dominican Republic?

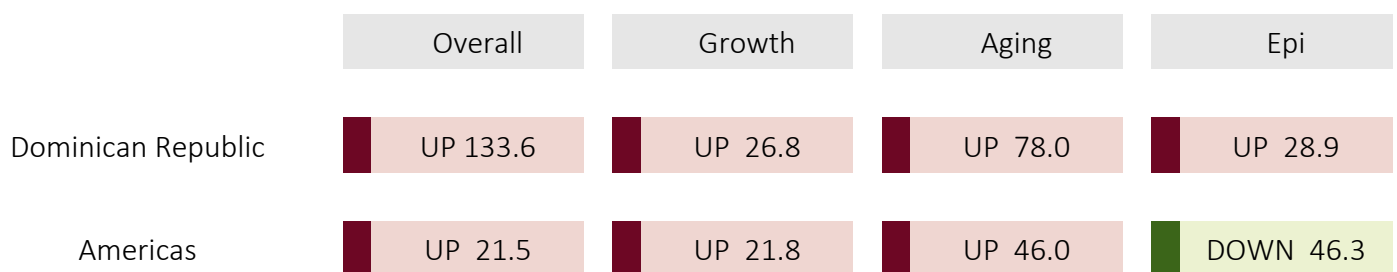

This last chart presents the percentage change in deaths between 2000 and 2019, due to population growth, population aging, and due to *epidemiological change*. This last effect is more accurately called *the change in age-specific mortality rates*, which can be ascribed to changes in the health profile of a population and national health system changes.



# Population Aging and Noncommunicable Disease in Ecuador

Briefing created by Ian Hambleton.

The University of the West Indies.

Updated on: 22 Nov 2022 at 14:22:54

**WHAT IS** the size of the population and the number of older adults in Ecuador?

|            |      | Women (n)  |           | Men (n)    |           | All (n)    |           |
|------------|------|------------|-----------|------------|-----------|------------|-----------|
|            |      | All ages   | 70+       | All ages   | 70+       | All ages   | 70+       |
| Population | 2000 | 6,315,964  | 216,729   | 6,365,159  | 181,880   | 12,681,123 | 398,609   |
|            | 2020 | 8,819,233  | 466,438   | 8,823,827  | 386,763   | 17,643,060 | 853,201   |
|            | 2040 | 10,899,848 | 1,073,085 | 10,862,515 | 901,098   | 21,762,362 | 1,974,183 |
|            | 2060 | 12,206,919 | 1,892,980 | 12,208,740 | 1,643,966 | 24,415,662 | 3,536,946 |

**HOW WILL** the proportion of older adults change in the future in Ecuador?

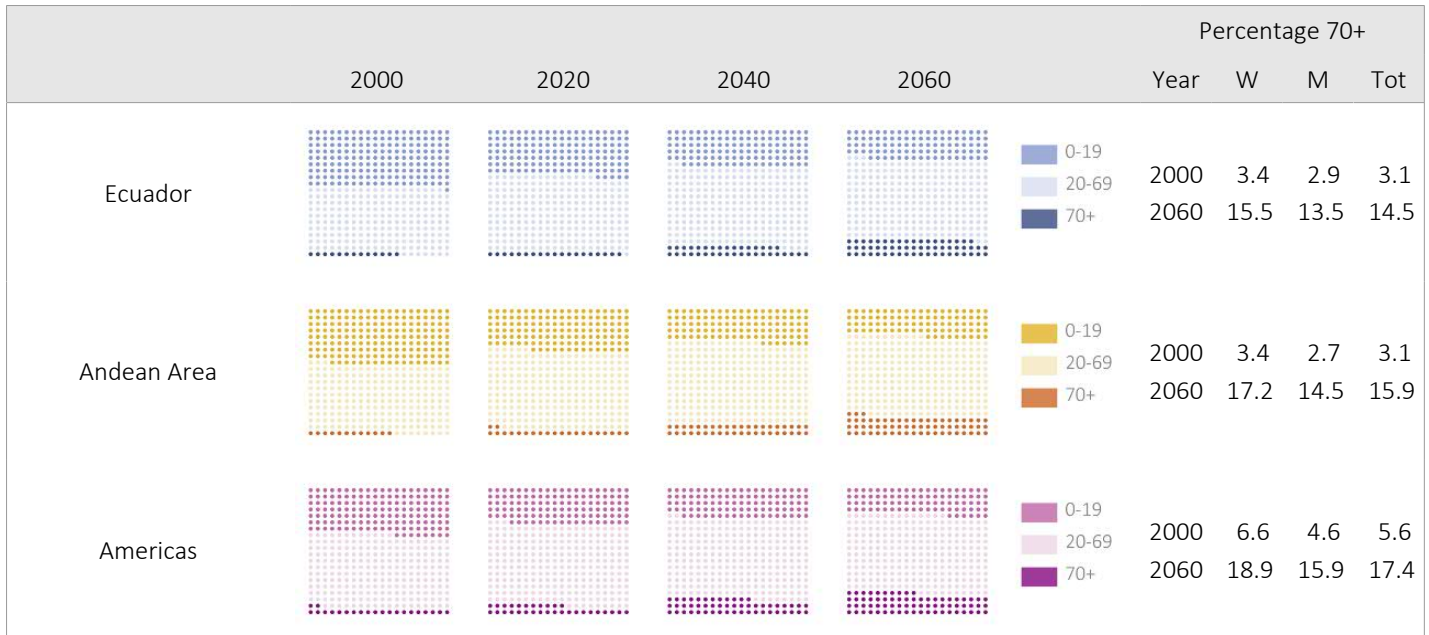

**WHAT ARE** the number of deaths and the mortality rates from noncommunicable disease in Ecuador?

|             |      | Mortality (n) |           |           | Mortality (rate per 100,000) |     |     |
|-------------|------|---------------|-----------|-----------|------------------------------|-----|-----|
|             |      | F             | M         | Tot       | F                            | M   | Tot |
| Ecuador     | 2000 | 17,453        | 18,764    | 36,218    | 384                          | 472 | 425 |
|             | 2019 | 29,823        | 31,278    | 61,102    | 327                          | 412 | 365 |
| Andean Area | 2000 | 157,087       | 156,463   | 313,550   | 403                          | 486 | 440 |
|             | 2019 | 260,586       | 259,302   | 519,889   | 326                          | 404 | 361 |
| Americas    | 2000 | 2,106,791     | 2,107,131 | 4,213,922 | 421                          | 594 | 497 |
|             | 2019 | 2,861,523     | 2,957,614 | 5,819,137 | 352                          | 483 | 412 |

**HOW HAS** population growth, population aging, and epidemiological change affected the number of deaths in Ecuador?

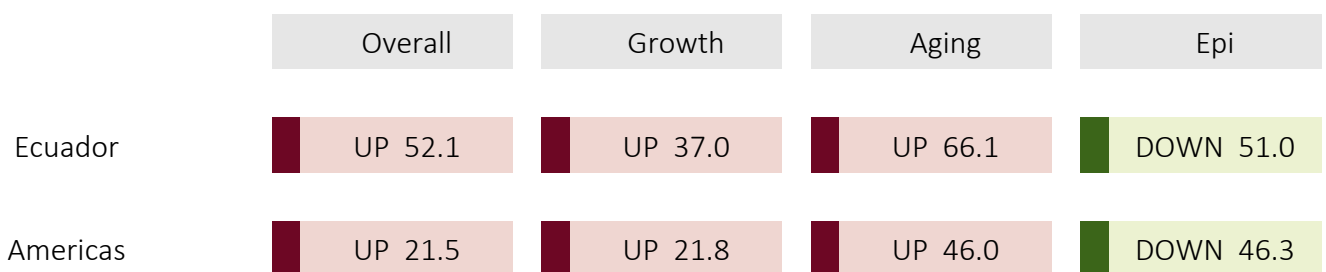

This last chart presents the percentage change in deaths between 2000 and 2019, due to population growth, population aging, and due to *epidemiological change*. This last effect is more accurately called *the change in age-specific mortality rates*, which can be ascribed to changes in the health profile of a population and national health system changes.



# Population Aging and Noncommunicable Disease in El Salvador

Briefing created by Ian Hambleton.

The University of the West Indies.

Updated on: 22 Nov 2022 at 14:22:57

**WHAT IS** the size of the population and the number of older adults in El Salvador?

|            |      | Women (n) |         | Men (n)   |         | All (n)   |           |
|------------|------|-----------|---------|-----------|---------|-----------|-----------|
|            |      | All ages  | 70+     | All ages  | 70+     | All ages  | 70+       |
| Population | 2000 | 3,051,738 | 110,712 | 2,836,192 | 86,444  | 5,887,930 | 197,156   |
|            | 2020 | 3,449,777 | 219,608 | 3,036,424 | 156,182 | 6,486,201 | 375,790   |
|            | 2040 | 3,695,948 | 399,398 | 3,235,548 | 241,869 | 6,931,496 | 641,267   |
|            | 2060 | 3,591,759 | 629,428 | 3,193,913 | 374,633 | 6,785,672 | 1,004,061 |

**HOW WILL** the proportion of older adults change in the future in El Salvador?

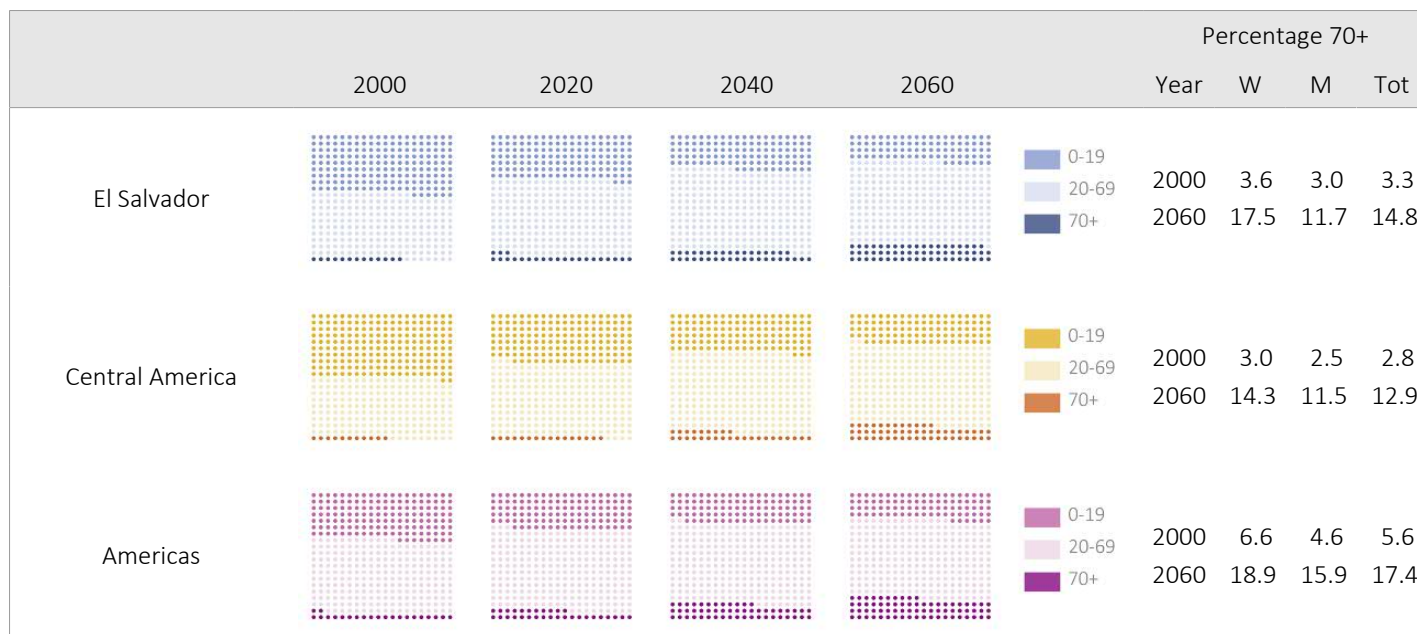

**WHAT ARE** the number of deaths and the mortality rates from noncommunicable disease in El Salvador?

|                 |      | Mortality (n) |           |           | Mortality (rate per 100,000) |     |     |
|-----------------|------|---------------|-----------|-----------|------------------------------|-----|-----|
|                 |      | F             | M         | Tot       | F                            | M   | Tot |
| El Salvador     | 2000 | 7,782         | 9,299     | 17,082    | 363                          | 541 | 441 |
|                 | 2019 | 12,375        | 14,141    | 26,516    | 312                          | 505 | 393 |
| Central America | 2000 | 49,275        | 53,417    | 102,692   | 432                          | 545 | 484 |
|                 | 2019 | 92,270        | 94,934    | 187,203   | 404                          | 518 | 455 |
| Americas        | 2000 | 2,106,791     | 2,107,131 | 4,213,922 | 421                          | 594 | 497 |
|                 | 2019 | 2,861,523     | 2,957,614 | 5,819,137 | 352                          | 483 | 412 |

**HOW HAS** population growth, population aging, and epidemiological change affected the number of deaths in El Salvador?

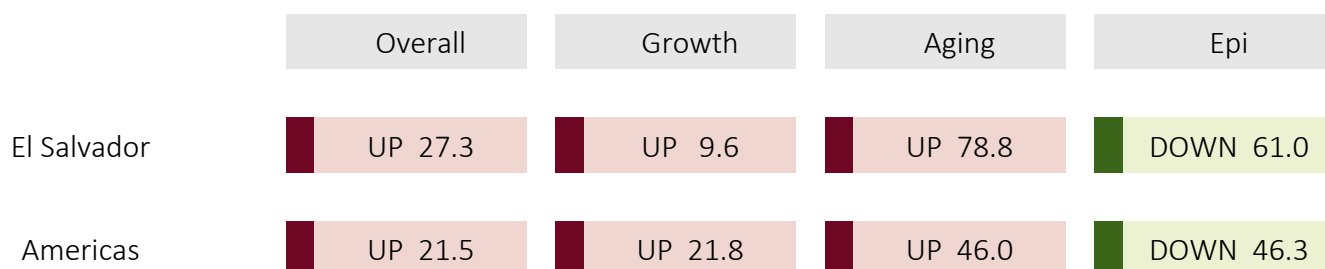

This last chart presents the percentage change in deaths between 2000 and 2019, due to population growth, population aging, and due to *epidemiological change*. This last effect is more accurately called *the change in age-specific mortality rates*, which can be ascribed to changes in the health profile of a population and national health system changes.

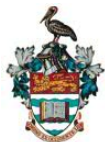

# Population Aging and Noncommunicable Disease in Grenada

Briefing created by Ian Hambleton.

The University of the West Indies.

Updated on: 22 Nov 2022 at 14:23:00

**WHAT IS** the size of the population and the number of older adults in Grenada?

|            |      | Women (n) |       | Men (n)  |       | All (n)  |        |
|------------|------|-----------|-------|----------|-------|----------|--------|
|            |      | All ages  | 70+   | All ages | 70+   | All ages | 70+    |
| Population | 2000 | 51,694    | 3,350 | 51,143   | 2,317 | 102,837  | 5,667  |
|            | 2020 | 55,853    | 4,084 | 56,666   | 3,076 | 112,519  | 7,160  |
|            | 2040 | 58,444    | 6,423 | 58,030   | 4,833 | 116,474  | 11,256 |
|            | 2060 | 56,792    | 9,406 | 55,488   | 7,008 | 112,280  | 16,414 |

**HOW WILL** the proportion of older adults change in the future in Grenada?

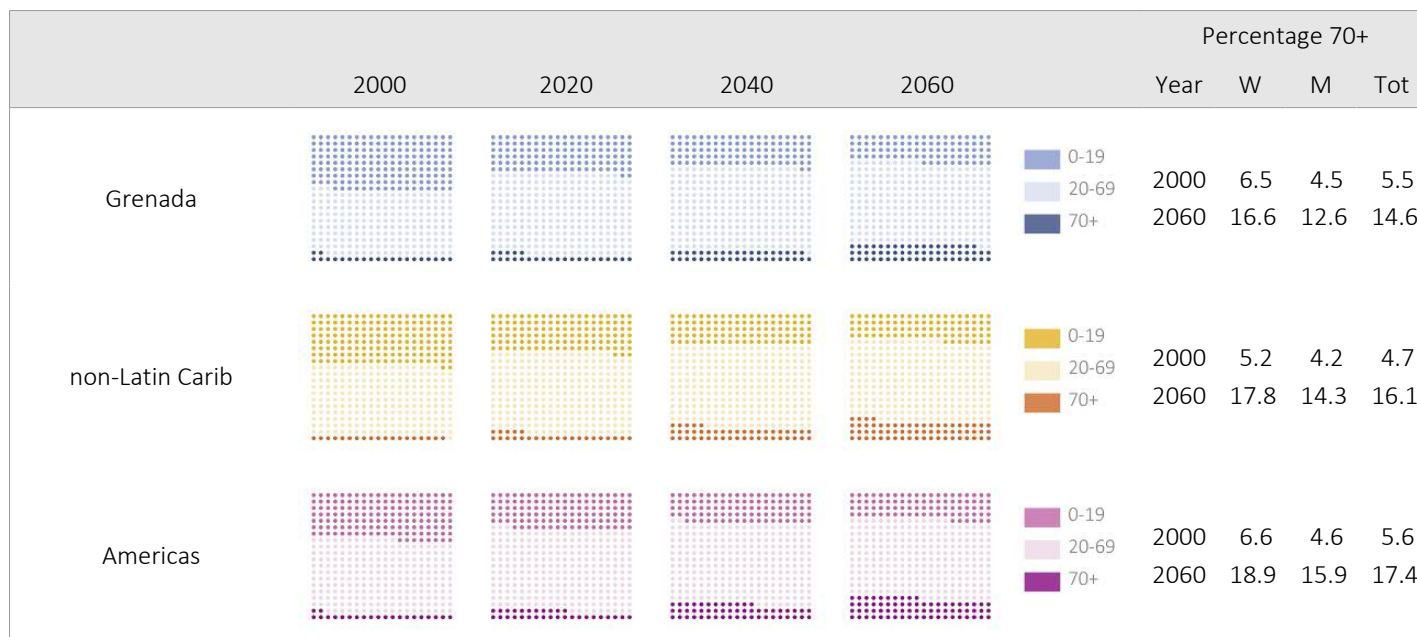

**WHAT ARE** the number of deaths and the mortality rates from noncommunicable disease in Grenada?

|                 |      | Mortality (n) |           |           | Mortality (rate per 100,000) |     |     |
|-----------------|------|---------------|-----------|-----------|------------------------------|-----|-----|
|                 |      | F             | M         | Tot       | F                            | M   | Tot |
| Grenada         | 2000 | 263           | 381       | 644       | 488                          | 920 | 669 |
|                 | 2019 | 394           | 446       | 840       | 524                          | 732 | 619 |
| non-Latin Carib | 2000 | 14,964        | 16,061    | 31,025    | 519                          | 665 | 586 |
|                 | 2019 | 19,239        | 21,211    | 40,450    | 452                          | 579 | 511 |
| Americas        | 2000 | 2,106,791     | 2,107,131 | 4,213,922 | 421                          | 594 | 497 |
|                 | 2019 | 2,861,523     | 2,957,614 | 5,819,137 | 352                          | 483 | 412 |

**HOW HAS** population growth, population aging, and epidemiological change affected the number of deaths in Grenada?

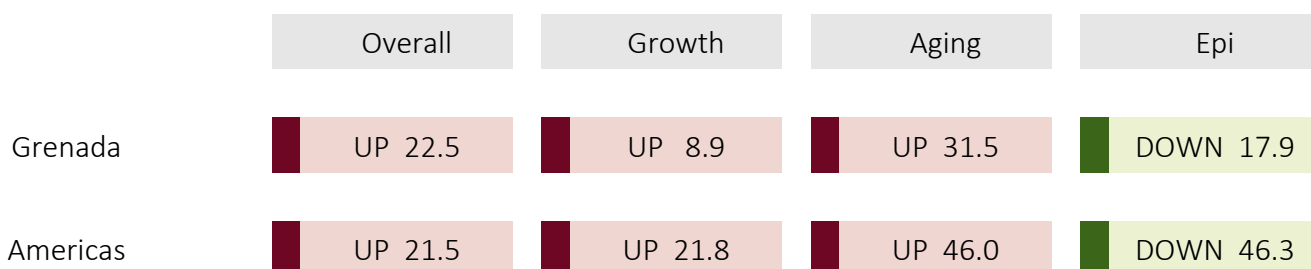

This last chart presents the percentage change in deaths between 2000 and 2019, due to population growth, population aging, and due to *epidemiological change*. This last effect is more accurately called *the change in age-specific mortality rates*, which can be ascribed to changes in the health profile of a population and national health system changes.





# Population Aging and Noncommunicable Disease in Guatemala

Briefing created by Ian Hambleton.

The University of the West Indies.

Updated on: 22 Nov 2022 at 14:23:03

**WHAT IS** the size of the population and the number of older adults in Guatemala?

|            |      | Women (n)  |           | Men (n)    |           | All (n)    |           |
|------------|------|------------|-----------|------------|-----------|------------|-----------|
|            |      | All ages   | 70+       | All ages   | 70+       | All ages   | 70+       |
| Population | 2000 | 5,934,007  | 152,919   | 5,716,737  | 131,739   | 11,650,744 | 284,658   |
|            | 2020 | 9,088,458  | 321,731   | 8,827,109  | 254,879   | 17,915,564 | 576,610   |
|            | 2040 | 12,258,991 | 735,055   | 12,002,448 | 528,116   | 24,261,440 | 1,263,171 |
|            | 2060 | 14,632,556 | 1,667,006 | 14,460,472 | 1,314,679 | 29,093,032 | 2,981,685 |

**HOW WILL** the proportion of older adults change in the future in Guatemala?

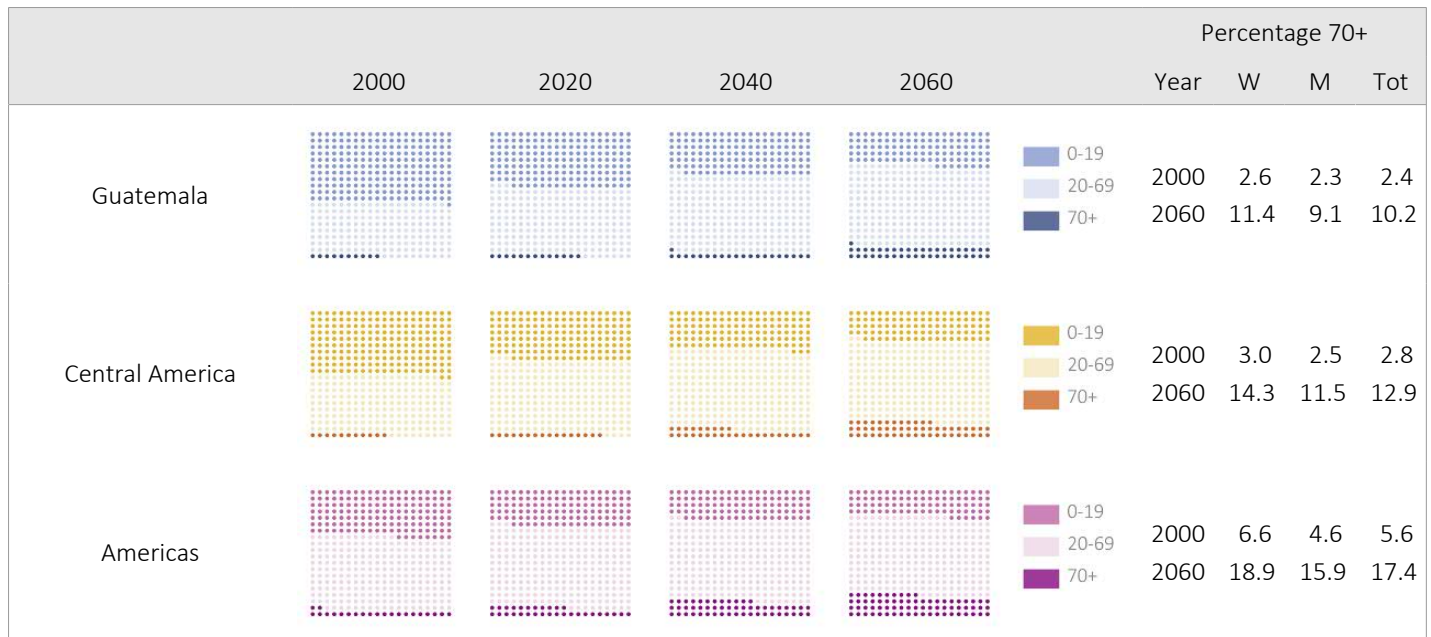

**WHAT ARE** the number of deaths and the mortality rates from noncommunicable disease in Guatemala?

|                 |      | Mortality (n) |           |           | Mortality (rate per 100,000) |     |     |
|-----------------|------|---------------|-----------|-----------|------------------------------|-----|-----|
|                 |      | F             | M         | Tot       | F                            | M   | Tot |
| Guatemala       | 2000 | 14,606        | 17,750    | 32,355    | 460                          | 618 | 533 |
|                 | 2019 | 28,628        | 29,940    | 58,568    | 446                          | 560 | 498 |
| Central America | 2000 | 49,275        | 53,417    | 102,692   | 432                          | 545 | 484 |
|                 | 2019 | 92,270        | 94,934    | 187,203   | 404                          | 518 | 455 |
| Americas        | 2000 | 2,106,791     | 2,107,131 | 4,213,922 | 421                          | 594 | 497 |
|                 | 2019 | 2,861,523     | 2,957,614 | 5,819,137 | 352                          | 483 | 412 |

**HOW HAS** population growth, population aging, and epidemiological change affected the number of deaths in Guatemala?

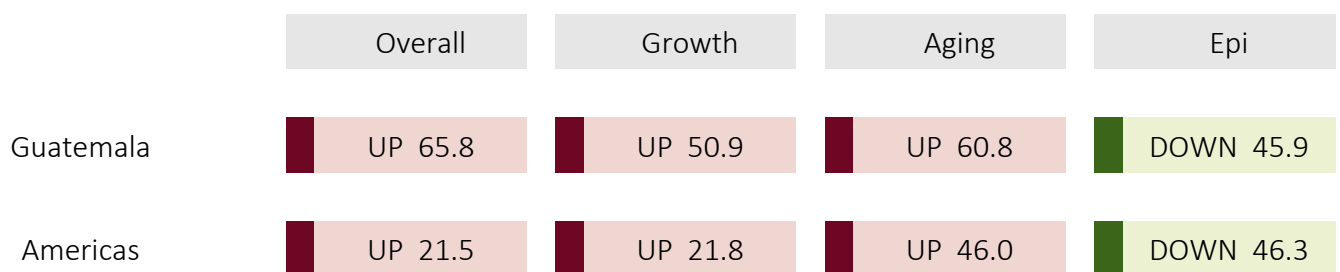

This last chart presents the percentage change in deaths between 2000 and 2019, due to population growth, population aging, and due to *epidemiological change*. This last effect is more accurately called *the change in age-specific mortality rates*, which can be ascribed to changes in the health profile of a population and national health system changes.



# Population Aging and Noncommunicable Disease in Guyana

Briefing created by Ian Hambleton.

The University of the West Indies.

Updated on: 22 Nov 2022 at 14:23:05

**WHAT IS** the size of the population and the number of older adults in Guyana?

|            |      | Women (n) |        | Men (n)  |        | All (n)  |        |
|------------|------|-----------|--------|----------|--------|----------|--------|
|            |      | All ages  | 70+    | All ages | 70+    | All ages | 70+    |
| Population | 2000 | 374,624   | 10,555 | 372,094  | 8,942  | 746,718  | 19,497 |
|            | 2020 | 391,010   | 18,469 | 395,549  | 15,478 | 786,559  | 33,947 |
|            | 2040 | 414,254   | 42,579 | 421,080  | 34,001 | 835,334  | 76,580 |
|            | 2060 | 394,280   | 51,084 | 400,821  | 38,436 | 795,101  | 89,520 |

**HOW WILL** the proportion of older adults change in the future in Guyana?

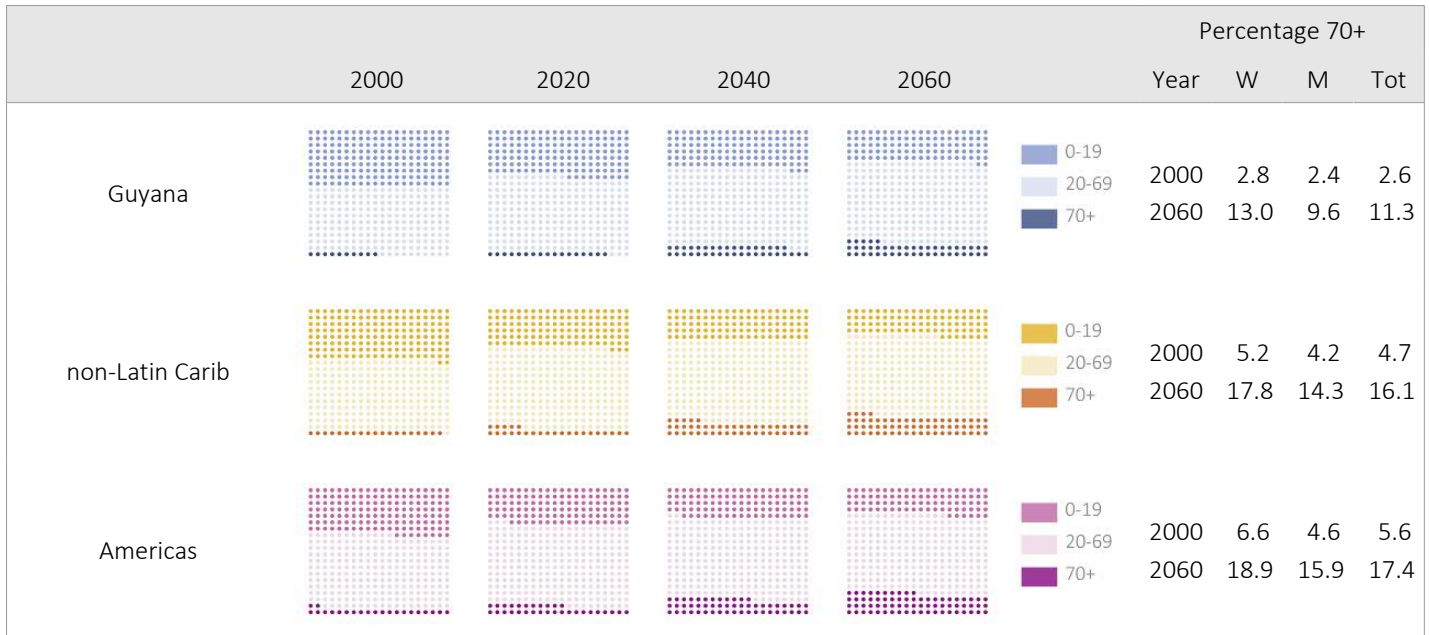

**WHAT ARE** the number of deaths and the mortality rates from noncommunicable disease in Guyana?

|                 |      | Mortality (n) |           |           | Mortality (rate per 100,000) |       |     |
|-----------------|------|---------------|-----------|-----------|------------------------------|-------|-----|
|                 |      | F             | M         | Tot       | F                            | M     | Tot |
| Guyana          | 2000 | 1,705         | 2,001     | 3,707     | 801                          | 1,022 | 906 |
|                 | 2019 | 2,640         | 2,970     | 5,610     | 711                          | 897   | 802 |
| non-Latin Carib | 2000 | 14,964        | 16,061    | 31,025    | 519                          | 665   | 586 |
|                 | 2019 | 19,239        | 21,211    | 40,450    | 452                          | 579   | 511 |
| Americas        | 2000 | 2,106,791     | 2,107,131 | 4,213,922 | 421                          | 594   | 497 |
|                 | 2019 | 2,861,523     | 2,957,614 | 5,819,137 | 352                          | 483   | 412 |

**HOW HAS** population growth, population aging, and epidemiological change affected the number of deaths in Guyana?

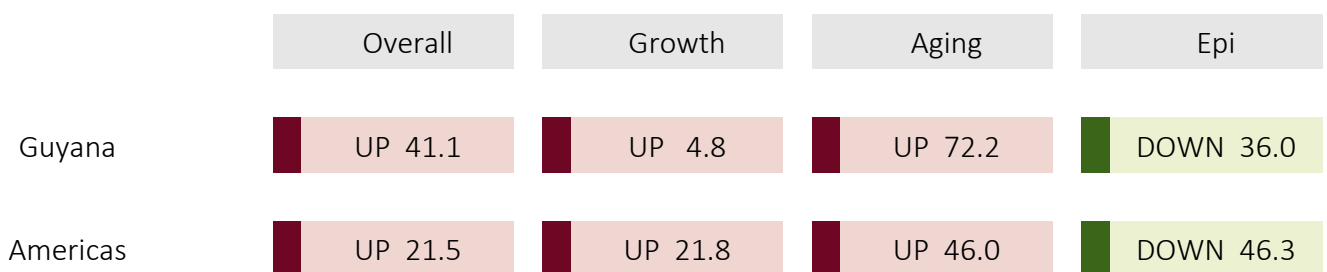

This last chart presents the percentage change in deaths between 2000 and 2019, due to population growth, population aging, and due to *epidemiological change*. This last effect is more accurately called *the change in age-specific mortality rates*, which can be ascribed to changes in the health profile of a population and national health system changes.



# Population Aging and Noncommunicable Disease in Haiti

Briefing created by Ian Hambleton.

The University of the West Indies.

Updated on: 22 Nov 2022 at 14:23:08

**WHAT IS** the size of the population and the number of older adults in Haiti?

|            |      | Women (n) |         | Men (n)   |         | All (n)    |           |
|------------|------|-----------|---------|-----------|---------|------------|-----------|
|            |      | All ages  | 70+     | All ages  | 70+     | All ages   | 70+       |
| Population | 2000 | 4,296,267 | 114,528 | 4,167,535 | 92,290  | 8,463,802  | 206,818   |
|            | 2020 | 5,776,088 | 204,406 | 5,626,445 | 154,663 | 11,402,533 | 359,069   |
|            | 2040 | 7,031,164 | 380,978 | 6,884,755 | 290,303 | 13,915,919 | 671,281   |
|            | 2060 | 7,834,038 | 750,118 | 7,657,065 | 570,028 | 15,491,103 | 1,320,146 |

**HOW WILL** the proportion of older adults change in the future in Haiti?

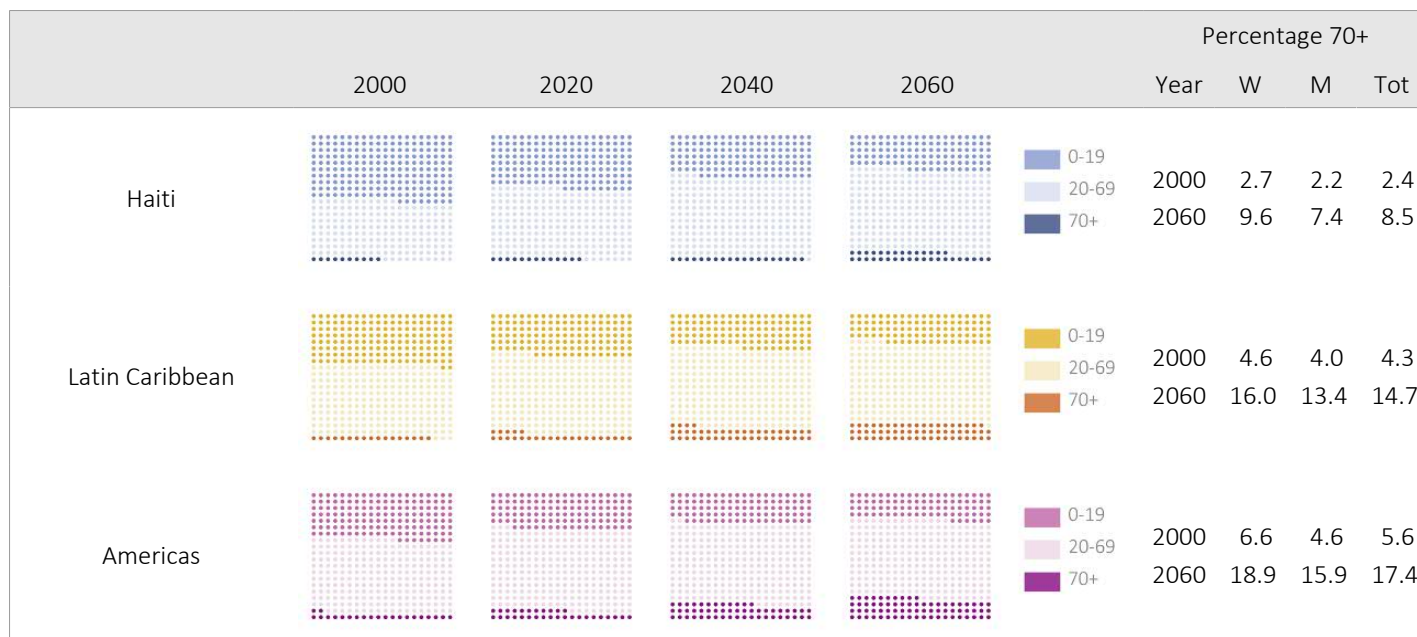

**WHAT ARE** the number of deaths and the mortality rates from noncommunicable disease in Haiti?

|                 |      | Mortality (n) |           |           | Mortality (rate per 100,000) |     |     |
|-----------------|------|---------------|-----------|-----------|------------------------------|-----|-----|
|                 |      | F             | M         | Tot       | F                            | M   | Tot |
| Haiti           | 2000 | 24,780        | 18,934    | 43,715    | 965                          | 880 | 924 |
|                 | 2019 | 34,887        | 27,988    | 62,875    | 849                          | 829 | 839 |
| Latin Caribbean | 2000 | 62,037        | 64,329    | 126,367   | 499                          | 582 | 537 |
|                 | 2019 | 101,680       | 105,926   | 207,606   | 489                          | 604 | 542 |
| Americas        | 2000 | 2,106,791     | 2,107,131 | 4,213,922 | 421                          | 594 | 497 |
|                 | 2019 | 2,861,523     | 2,957,614 | 5,819,137 | 352                          | 483 | 412 |

**HOW HAS** population growth, population aging, and epidemiological change affected the number of deaths in Haiti?

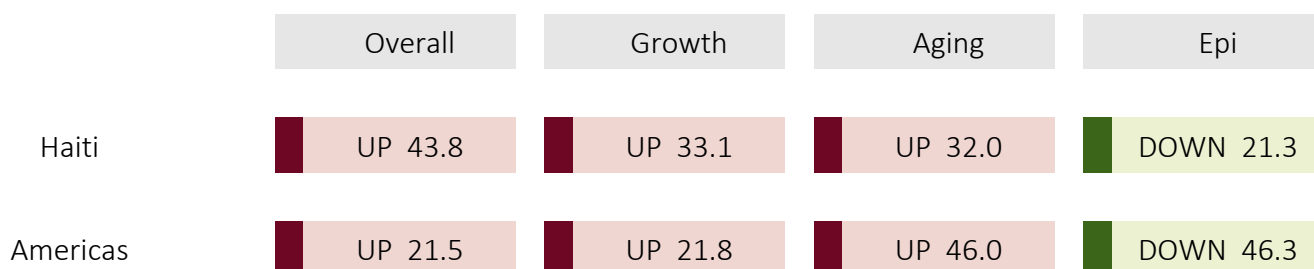

This last chart presents the percentage change in deaths between 2000 and 2019, due to population growth, population aging, and due to *epidemiological change*. This last effect is more accurately called *the change in age-specific mortality rates*, which can be ascribed to changes in the health profile of a population and national health system changes.



# Population Aging and Noncommunicable Disease in Honduras

Briefing created by Ian Hambleton.

The University of the West Indies.

Updated on: 22 Nov 2022 at 14:23:10

**WHAT IS** the size of the population and the number of older adults in Honduras?

|            |      | Women (n) |         | Men (n)   |         | All (n)    |           |
|------------|------|-----------|---------|-----------|---------|------------|-----------|
|            |      | All ages  | 70+     | All ages  | 70+     | All ages   | 70+       |
| Population | 2000 | 3,305,010 | 86,164  | 3,269,500 | 67,719  | 6,574,510  | 153,883   |
|            | 2020 | 4,955,728 | 173,406 | 4,948,880 | 136,392 | 9,904,608  | 309,798   |
|            | 2040 | 6,386,261 | 438,384 | 6,394,102 | 335,839 | 12,780,363 | 774,223   |
|            | 2060 | 7,273,784 | 954,258 | 7,300,744 | 795,881 | 14,574,528 | 1,750,139 |

**HOW WILL** the proportion of older adults change in the future in Honduras?

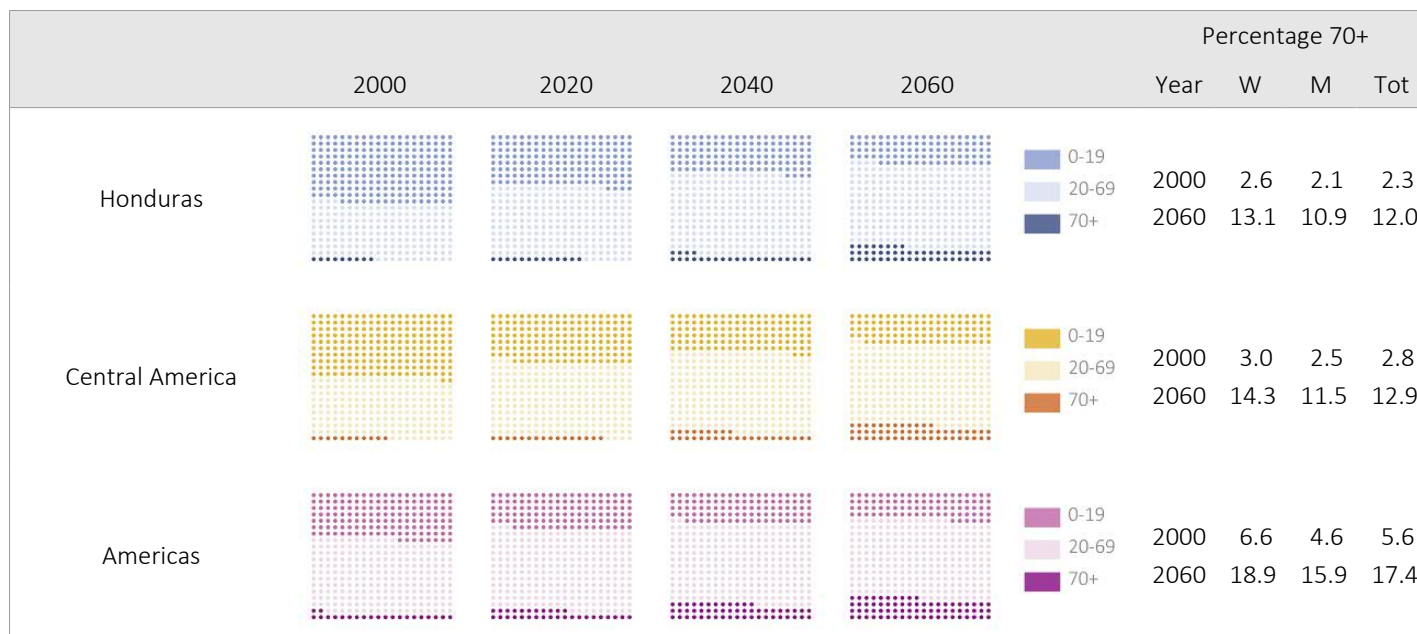

**WHAT ARE** the number of deaths and the mortality rates from noncommunicable disease in Honduras?

|                 |      | Mortality (n) |           |           | Mortality (rate per 100,000) |     |     |
|-----------------|------|---------------|-----------|-----------|------------------------------|-----|-----|
|                 |      | F             | M         | Tot       | F                            | M   | Tot |
| Honduras        | 2000 | 10,630        | 8,079     | 18,709    | 596                          | 521 | 563 |
|                 | 2019 | 21,804        | 17,491    | 39,295    | 616                          | 615 | 615 |
| Central America | 2000 | 49,275        | 53,417    | 102,692   | 432                          | 545 | 484 |
|                 | 2019 | 92,270        | 94,934    | 187,203   | 404                          | 518 | 455 |
| Americas        | 2000 | 2,106,791     | 2,107,131 | 4,213,922 | 421                          | 594 | 497 |
|                 | 2019 | 2,861,523     | 2,957,614 | 5,819,137 | 352                          | 483 | 412 |

**HOW HAS** population growth, population aging, and epidemiological change affected the number of deaths in Honduras?

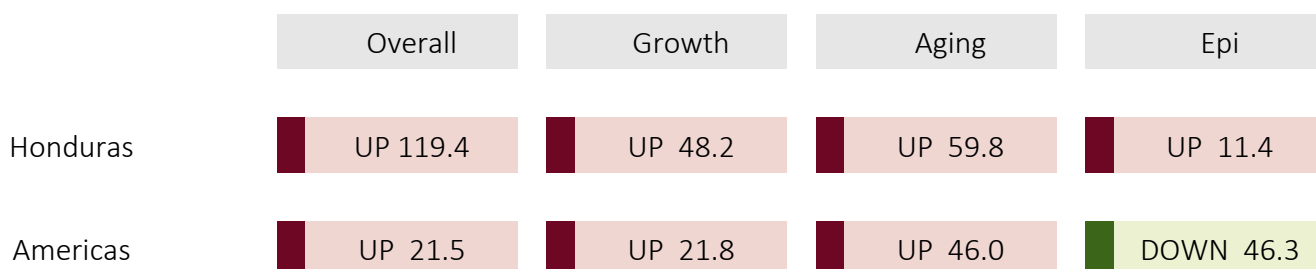

This last chart presents the percentage change in deaths between 2000 and 2019, due to population growth, population aging, and due to *epidemiological change*. This last effect is more accurately called *the change in age-specific mortality rates*, which can be ascribed to changes in the health profile of a population and national health system changes.



# Population Aging and Noncommunicable Disease in Jamaica

Briefing created by Ian Hambleton.

The University of the West Indies.

Updated on: 22 Nov 2022 at 14:23:13

**WHAT IS** the size of the population and the number of older adults in Jamaica?

|            |      | Women (n) |         | Men (n)   |         | All (n)   |         |
|------------|------|-----------|---------|-----------|---------|-----------|---------|
|            |      | All ages  | 70+     | All ages  | 70+     | All ages  | 70+     |
| Population | 2000 | 1,334,328 | 77,031  | 1,320,370 | 67,975  | 2,654,698 | 145,006 |
|            | 2020 | 1,491,520 | 92,181  | 1,469,641 | 86,208  | 2,961,161 | 178,389 |
|            | 2040 | 1,548,774 | 176,039 | 1,496,388 | 147,535 | 3,045,162 | 323,574 |
|            | 2060 | 1,435,632 | 255,270 | 1,372,239 | 202,982 | 2,807,871 | 458,252 |

**HOW WILL** the proportion of older adults change in the future in Jamaica?

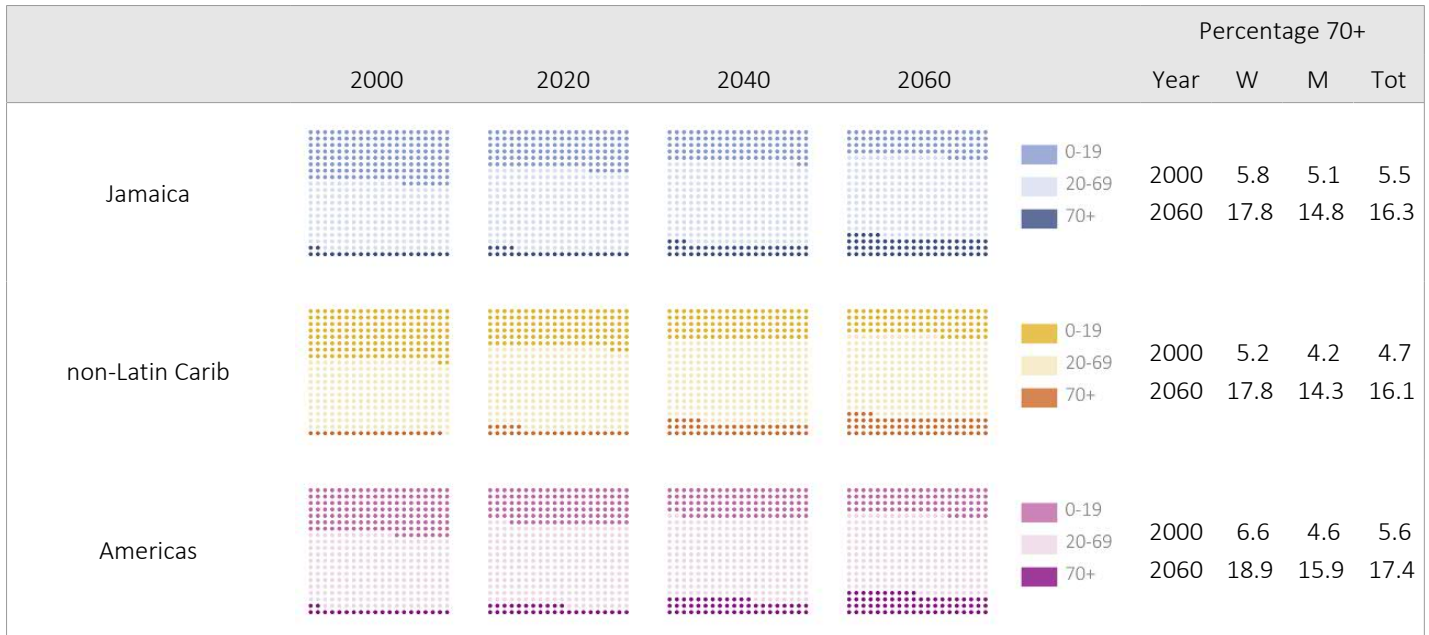

**WHAT ARE** the number of deaths and the mortality rates from noncommunicable disease in Jamaica?

|                 |      | Mortality (n) |           |           | Mortality (rate per 100,000) |     |     |
|-----------------|------|---------------|-----------|-----------|------------------------------|-----|-----|
|                 |      | F             | M         | Tot       | F                            | M   | Tot |
| Jamaica         | 2000 | 5,938         | 6,144     | 12,081    | 438                          | 506 | 469 |
|                 | 2019 | 7,566         | 7,744     | 15,310    | 434                          | 477 | 455 |
| non-Latin Carib | 2000 | 14,964        | 16,061    | 31,025    | 519                          | 665 | 586 |
|                 | 2019 | 19,239        | 21,211    | 40,450    | 452                          | 579 | 511 |
| Americas        | 2000 | 2,106,791     | 2,107,131 | 4,213,922 | 421                          | 594 | 497 |
|                 | 2019 | 2,861,523     | 2,957,614 | 5,819,137 | 352                          | 483 | 412 |

**HOW HAS** population growth, population aging, and epidemiological change affected the number of deaths in Jamaica?

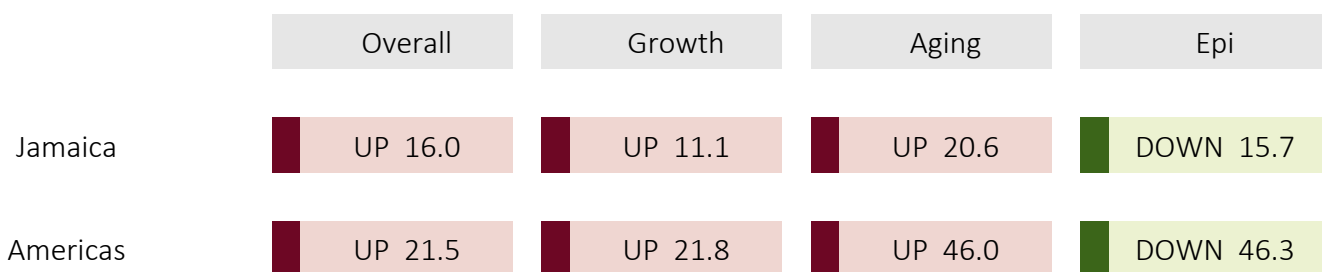

This last chart presents the percentage change in deaths between 2000 and 2019, due to population growth, population aging, and due to *epidemiological change*. This last effect is more accurately called *the change in age-specific mortality rates*, which can be ascribed to changes in the health profile of a population and national health system changes.



# Population Aging and Noncommunicable Disease in Mexico

Briefing created by Ian Hambleton.

The University of the West Indies.

Updated on: 22 Nov 2022 at 14:23:16

**WHAT IS** the size of the population and the number of older adults in Mexico?

|            |      | Women (n)  |            | Men (n)    |            | All (n)     |            |
|------------|------|------------|------------|------------|------------|-------------|------------|
|            |      | All ages   | 70+        | All ages   | 70+        | All ages    | 70+        |
| Population | 2000 | 50,341,808 | 1,880,343  | 48,558,044 | 1,442,759  | 98,899,840  | 3,323,102  |
|            | 2020 | 65,861,272 | 3,478,575  | 63,071,476 | 2,748,157  | 128,932,768 | 6,226,732  |
|            | 2040 | 76,494,008 | 7,897,909  | 73,265,000 | 5,899,808  | 149,759,056 | 13,797,717 |
|            | 2060 | 79,900,632 | 13,377,422 | 77,255,616 | 10,012,602 | 157,156,256 | 23,390,022 |

**HOW WILL** the proportion of older adults change in the future in Mexico?

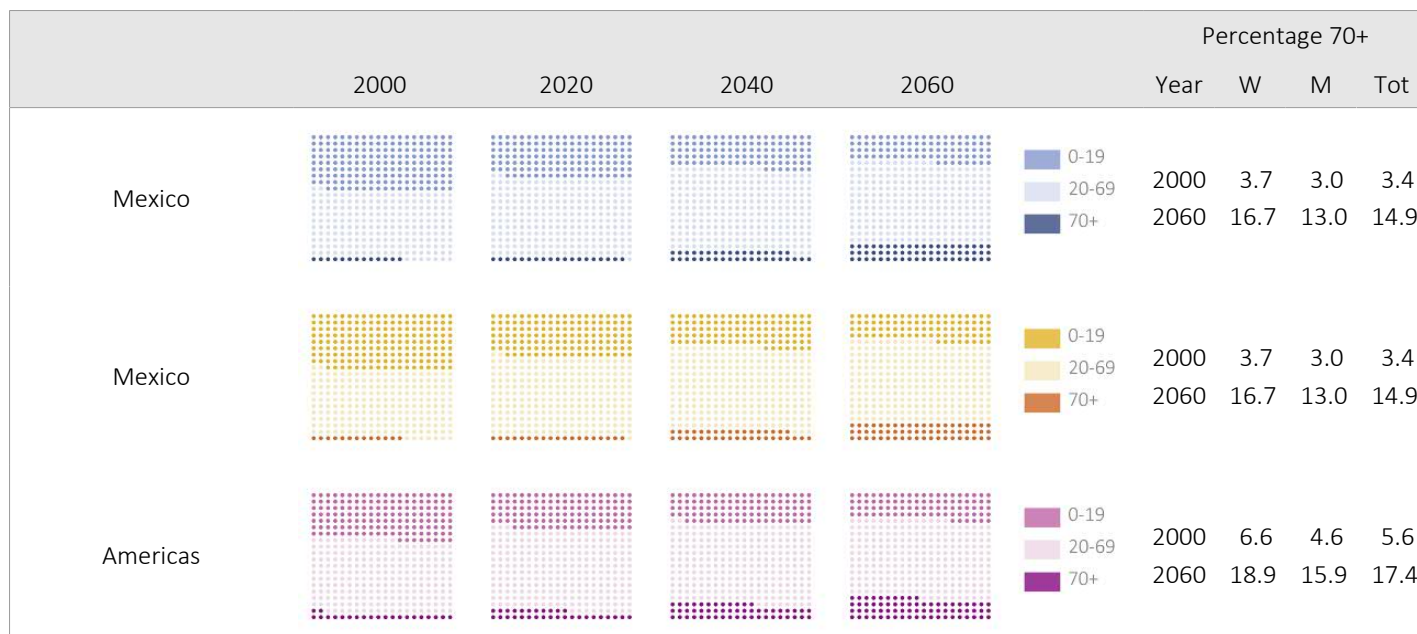

**WHAT ARE** the number of deaths and the mortality rates from noncommunicable disease in Mexico?

|          |      | Mortality (n) |           |           | Mortality (rate per 100,000) |     |     |
|----------|------|---------------|-----------|-----------|------------------------------|-----|-----|
|          |      | F             | M         | Tot       | F                            | M   | Tot |
| Mexico   | 2000 | 154,081       | 167,391   | 321,472   | 416                          | 543 | 474 |
|          | 2019 | 272,965       | 299,480   | 572,445   | 400                          | 543 | 466 |
| Mexico   | 2000 | 154,081       | 167,391   | 321,472   | 416                          | 543 | 474 |
|          | 2019 | 272,965       | 299,480   | 572,445   | 400                          | 543 | 466 |
| Americas | 2000 | 2,106,791     | 2,107,131 | 4,213,922 | 421                          | 594 | 497 |
|          | 2019 | 2,861,523     | 2,957,614 | 5,819,137 | 352                          | 483 | 412 |

**HOW HAS** population growth, population aging, and epidemiological change affected the number of deaths in Mexico?

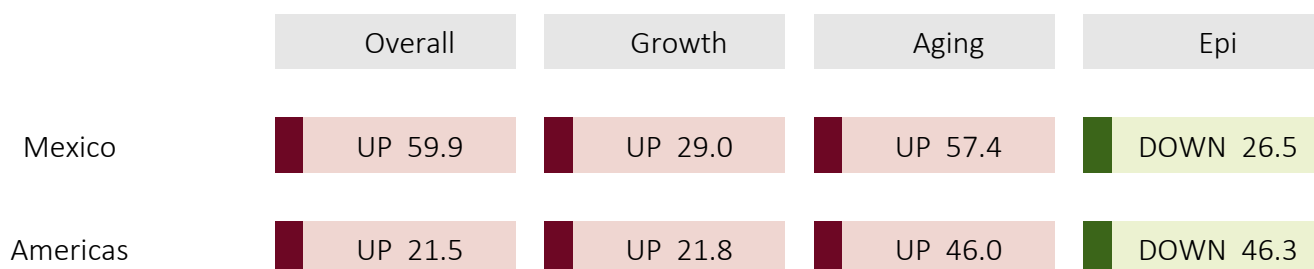

This last chart presents the percentage change in deaths between 2000 and 2019, due to population growth, population aging, and due to *epidemiological change*. This last effect is more accurately called *the change in age-specific mortality rates*, which can be ascribed to changes in the health profile of a population and national health system changes.



# Population Aging and Noncommunicable Disease in Nicaragua

Briefing created by Ian Hambleton.

The University of the West Indies.

Updated on: 22 Nov 2022 at 14:23:19

**WHAT IS** the size of the population and the number of older adults in Nicaragua?

|            |      | Women (n) |         | Men (n)   |         | All (n)   |           |
|------------|------|-----------|---------|-----------|---------|-----------|-----------|
|            |      | All ages  | 70+     | All ages  | 70+     | All ages  | 70+       |
| Population | 2000 | 2,561,997 | 70,085  | 2,507,313 | 50,482  | 5,069,310 | 120,567   |
|            | 2020 | 3,359,705 | 132,187 | 3,264,849 | 94,499  | 6,624,554 | 226,686   |
|            | 2040 | 4,081,081 | 343,120 | 3,967,667 | 230,270 | 8,048,748 | 573,390   |
|            | 2060 | 4,447,529 | 704,376 | 4,359,623 | 525,014 | 8,807,152 | 1,229,390 |

**HOW WILL** the proportion of older adults change in the future in Nicaragua?

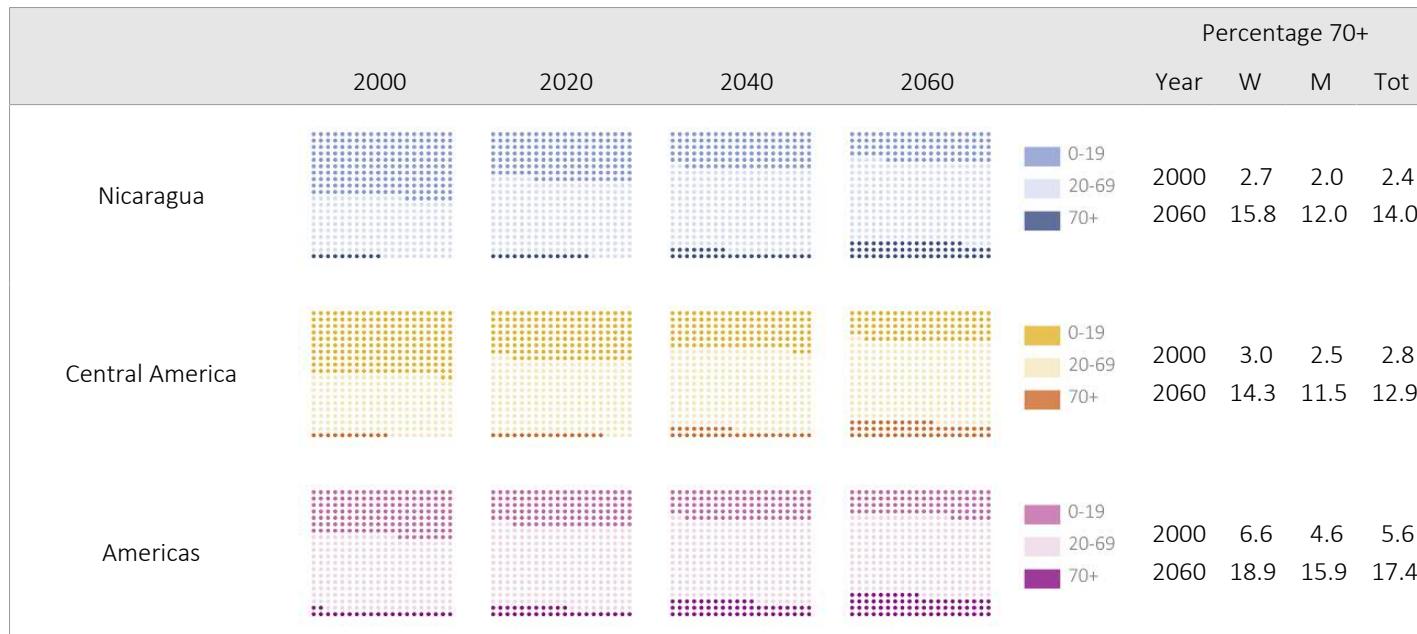

**WHAT ARE** the number of deaths and the mortality rates from noncommunicable disease in Nicaragua?

|                 |      | Mortality (n) |           |           | Mortality (rate per 100,000) |     |     |
|-----------------|------|---------------|-----------|-----------|------------------------------|-----|-----|
|                 |      | F             | M         | Tot       | F                            | M   | Tot |
| Nicaragua       | 2000 | 6,710         | 6,790     | 13,500    | 472                          | 606 | 531 |
|                 | 2019 | 12,511        | 13,757    | 26,269    | 450                          | 676 | 548 |
| Central America | 2000 | 49,275        | 53,417    | 102,692   | 432                          | 545 | 484 |
|                 | 2019 | 92,270        | 94,934    | 187,203   | 404                          | 518 | 455 |
| Americas        | 2000 | 2,106,791     | 2,107,131 | 4,213,922 | 421                          | 594 | 497 |
|                 | 2019 | 2,861,523     | 2,957,614 | 5,819,137 | 352                          | 483 | 412 |

**HOW HAS** population growth, population aging, and epidemiological change affected the number of deaths in Nicaragua?

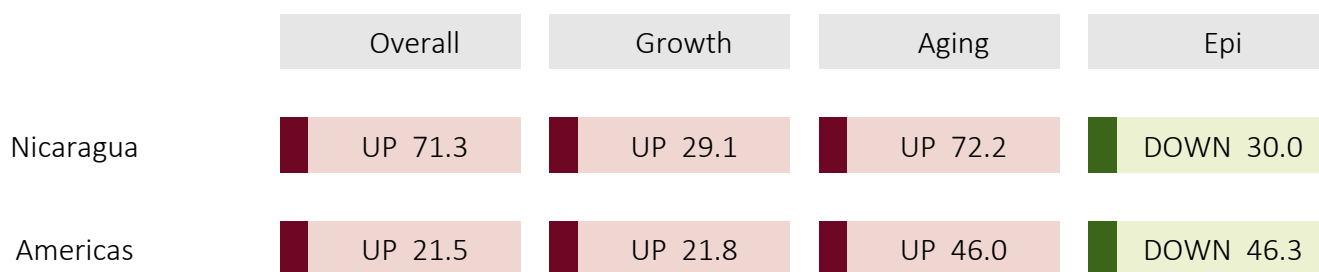

This last chart presents the percentage change in deaths between 2000 and 2019, due to population growth, population aging, and due to *epidemiological change*. This last effect is more accurately called *the change in age-specific mortality rates*, which can be ascribed to changes in the health profile of a population and national health system changes.



# Population Aging and Noncommunicable Disease in Panama

Briefing created by Ian Hambleton.

The University of the West Indies.

Updated on: 22 Nov 2022 at 14:23:21

**WHAT IS** the size of the population and the number of older adults in Panama?

|            |      | Women (n) |         | Men (n)   |         | All (n)   |         |
|------------|------|-----------|---------|-----------|---------|-----------|---------|
|            |      | All ages  | 70+     | All ages  | 70+     | All ages  | 70+     |
| Population | 2000 | 1,503,303 | 57,328  | 1,527,030 | 51,472  | 3,030,333 | 108,800 |
|            | 2020 | 2,154,888 | 133,482 | 2,159,880 | 112,042 | 4,314,768 | 245,524 |
|            | 2040 | 2,729,222 | 304,922 | 2,713,019 | 255,546 | 5,442,241 | 560,468 |
|            | 2060 | 3,084,953 | 514,076 | 3,066,306 | 441,689 | 6,151,259 | 955,765 |

**HOW WILL** the proportion of older adults change in the future in Panama?

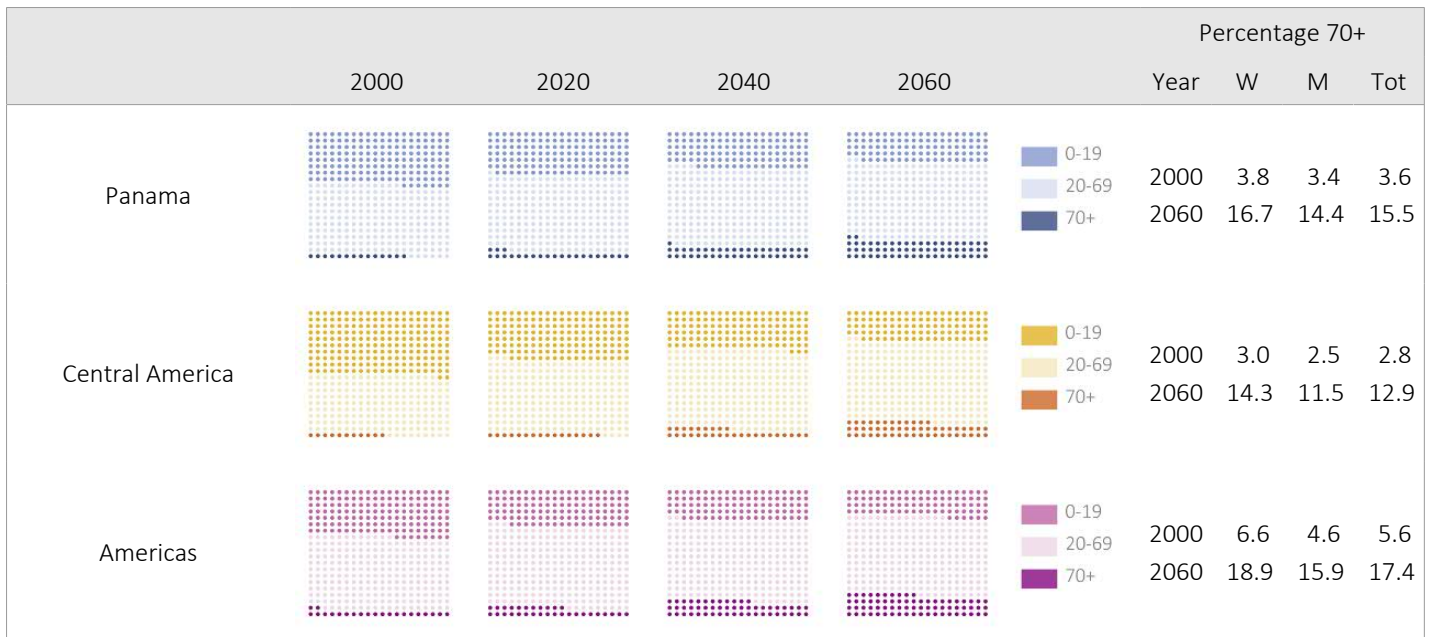

**WHAT ARE** the number of deaths and the mortality rates from noncommunicable disease in Panama?

|                 |      | Mortality (n) |           |           | Mortality (rate per 100,000) |     |     |
|-----------------|------|---------------|-----------|-----------|------------------------------|-----|-----|
|                 |      | F             | M         | Tot       | F                            | M   | Tot |
| Panama          | 2000 | 3,826         | 4,660     | 8,486     | 323                          | 434 | 376 |
|                 | 2019 | 7,270         | 8,473     | 15,743    | 282                          | 394 | 335 |
| Central America | 2000 | 49,275        | 53,417    | 102,692   | 432                          | 545 | 484 |
|                 | 2019 | 92,270        | 94,934    | 187,203   | 404                          | 518 | 455 |
| Americas        | 2000 | 2,106,791     | 2,107,131 | 4,213,922 | 421                          | 594 | 497 |
|                 | 2019 | 2,861,523     | 2,957,614 | 5,819,137 | 352                          | 483 | 412 |

**HOW HAS** population growth, population aging, and epidemiological change affected the number of deaths in Panama?

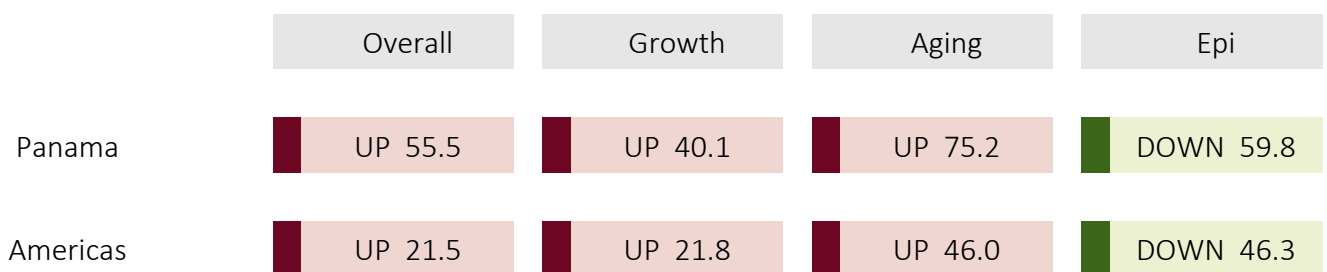

This last chart presents the percentage change in deaths between 2000 and 2019, due to population growth, population aging, and due to *epidemiological change*. This last effect is more accurately called *the change in age-specific mortality rates*, which can be ascribed to changes in the health profile of a population and national health system changes.





# Population Aging and Noncommunicable Disease in Paraguay

Briefing created by Ian Hambleton.

The University of the West Indies.

Updated on: 22 Nov 2022 at 14:23:24

**WHAT IS** the size of the population and the number of older adults in Paraguay?

|            |      | Women (n) |         | Men (n)   |         | All (n)   |           |
|------------|------|-----------|---------|-----------|---------|-----------|-----------|
|            |      | All ages  | 70+     | All ages  | 70+     | All ages  | 70+       |
| Population | 2000 | 2,622,196 | 83,765  | 2,701,006 | 67,837  | 5,323,202 | 151,602   |
|            | 2020 | 3,508,170 | 162,472 | 3,624,360 | 141,536 | 7,132,530 | 304,008   |
|            | 2040 | 4,265,870 | 322,777 | 4,347,934 | 272,730 | 8,613,804 | 595,507   |
|            | 2060 | 4,684,597 | 591,797 | 4,715,327 | 500,644 | 9,399,924 | 1,092,441 |

**HOW WILL** the proportion of older adults change in the future in Paraguay?

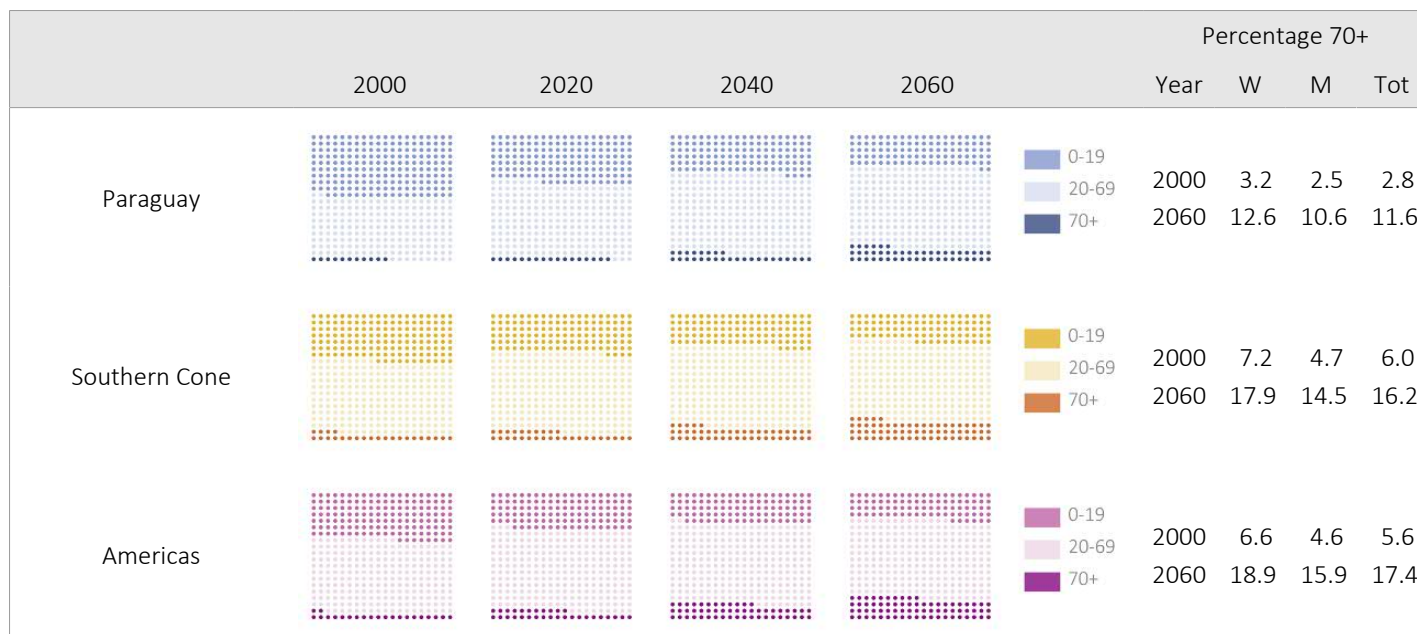

**WHAT ARE** the number of deaths and the mortality rates from noncommunicable disease in Paraguay?

|               |      | Mortality (n) |           |           | Mortality (rate per 100,000) |     |     |
|---------------|------|---------------|-----------|-----------|------------------------------|-----|-----|
|               |      | F             | M         | Tot       | F                            | M   | Tot |
| Paraguay      | 2000 | 6,421         | 6,957     | 13,378    | 388                          | 475 | 428 |
|               | 2019 | 11,261        | 14,521    | 25,782    | 371                          | 531 | 448 |
| Southern Cone | 2000 | 153,834       | 171,601   | 325,435   | 402                          | 668 | 514 |
|               | 2019 | 205,567       | 210,855   | 416,422   | 328                          | 515 | 408 |
| Americas      | 2000 | 2,106,791     | 2,107,131 | 4,213,922 | 421                          | 594 | 497 |
|               | 2019 | 2,861,523     | 2,957,614 | 5,819,137 | 352                          | 483 | 412 |

**HOW HAS** population growth, population aging, and epidemiological change affected the number of deaths in Paraguay?

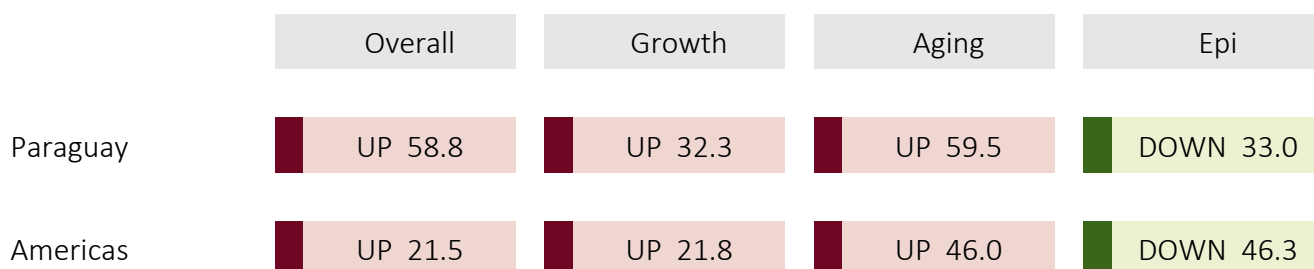

This last chart presents the percentage change in deaths between 2000 and 2019, due to population growth, population aging, and due to *epidemiological change*. This last effect is more accurately called *the change in age-specific mortality rates*, which can be ascribed to changes in the health profile of a population and national health system changes.



# Population Aging and Noncommunicable Disease in Peru

Briefing created by Ian Hambleton.

The University of the West Indies.

Updated on: 22 Nov 2022 at 14:23:27

**WHAT IS** the size of the population and the number of older adults in Peru?

|            |      | Women (n)  |           | Men (n)    |           | All (n)    |           |
|------------|------|------------|-----------|------------|-----------|------------|-----------|
|            |      | All ages   | 70+       | All ages   | 70+       | All ages   | 70+       |
| Population | 2000 | 13,269,175 | 446,285   | 13,190,769 | 343,256   | 26,459,944 | 789,541   |
|            | 2020 | 16,593,240 | 993,021   | 16,378,606 | 854,692   | 32,971,850 | 1,847,713 |
|            | 2040 | 19,465,292 | 2,160,758 | 19,086,826 | 1,810,053 | 38,552,120 | 3,970,811 |
|            | 2060 | 20,904,052 | 3,712,995 | 20,506,420 | 3,332,137 | 41,410,476 | 7,045,132 |

**HOW WILL** the proportion of older adults change in the future in Peru?

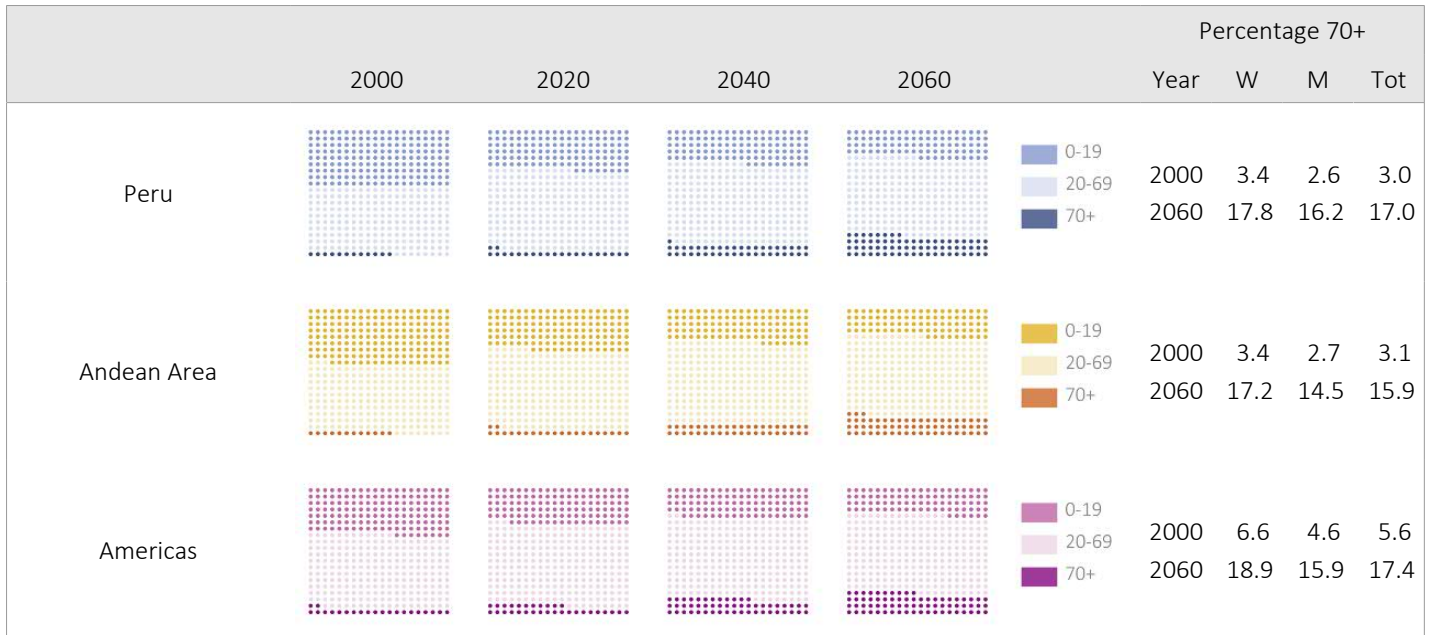

**WHAT ARE** the number of deaths and the mortality rates from noncommunicable disease in Peru?

|             |      | Mortality (n) |           |           | Mortality (rate per 100,000) |     |     |
|-------------|------|---------------|-----------|-----------|------------------------------|-----|-----|
|             |      | F             | M         | Tot       | F                            | M   | Tot |
| Peru        | 2000 | 33,339        | 29,198    | 62,537    | 369                          | 389 | 378 |
|             | 2019 | 51,576        | 51,360    | 102,935   | 283                          | 328 | 304 |
| Andean Area | 2000 | 157,087       | 156,463   | 313,550   | 403                          | 486 | 440 |
|             | 2019 | 260,586       | 259,302   | 519,889   | 326                          | 404 | 361 |
| Americas    | 2000 | 2,106,791     | 2,107,131 | 4,213,922 | 421                          | 594 | 497 |
|             | 2019 | 2,861,523     | 2,957,614 | 5,819,137 | 352                          | 483 | 412 |

**HOW HAS** population growth, population aging, and epidemiological change affected the number of deaths in Peru?

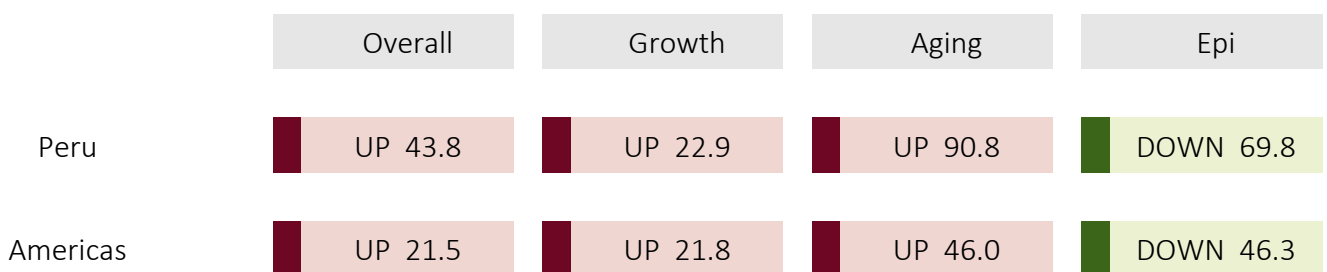

This last chart presents the percentage change in deaths between 2000 and 2019, due to population growth, population aging, and due to *epidemiological change*. This last effect is more accurately called *the change in age-specific mortality rates*, which can be ascribed to changes in the health profile of a population and national health system changes.



# Population Aging and Noncommunicable Disease in Saint Lucia

Briefing created by Ian Hambleton.

The University of the West Indies.

Updated on: 22 Nov 2022 at 14:23:29

**WHAT IS** the size of the population and the number of older adults in Saint Lucia?

|            |      | Women (n) |        | Men (n)  |        | All (n)  |        |
|------------|------|-----------|--------|----------|--------|----------|--------|
|            |      | All ages  | 70+    | All ages | 70+    | All ages | 70+    |
| Population | 2000 | 79,857    | 4,372  | 76,880   | 3,784  | 156,737  | 8,156  |
|            | 2020 | 93,207    | 6,589  | 90,422   | 6,183  | 183,629  | 12,772 |
|            | 2040 | 95,714    | 13,693 | 92,223   | 12,596 | 187,937  | 26,289 |
|            | 2060 | 87,816    | 19,560 | 84,701   | 17,092 | 172,517  | 36,652 |

**HOW WILL** the proportion of older adults change in the future in Saint Lucia?

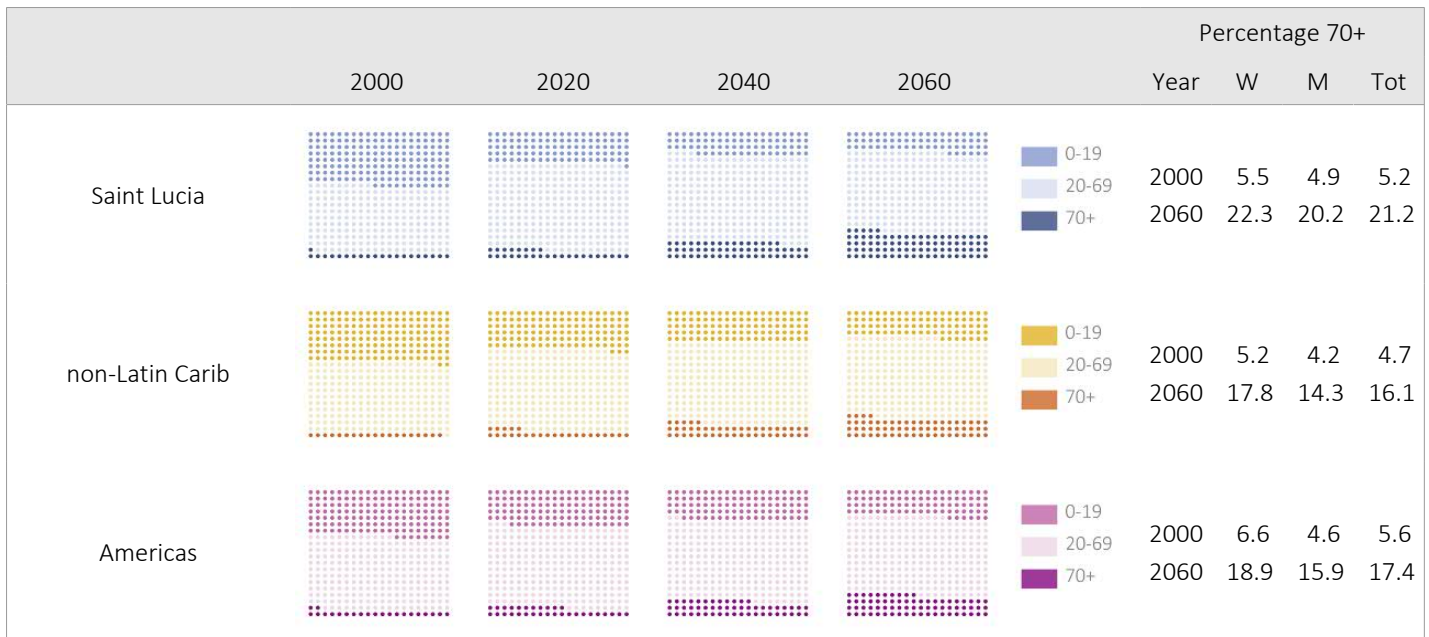

**WHAT ARE** the number of deaths and the mortality rates from noncommunicable disease in Saint Lucia?

|                 |      | Mortality (n) |           |           | Mortality (rate per 100,000) |     |     |
|-----------------|------|---------------|-----------|-----------|------------------------------|-----|-----|
|                 |      | F             | M         | Tot       | F                            | M   | Tot |
| Saint Lucia     | 2000 | 378           | 460       | 838       | 488                          | 682 | 580 |
|                 | 2019 | 513           | 715       | 1,228     | 420                          | 619 | 516 |
| non-Latin Carib | 2000 | 14,964        | 16,061    | 31,025    | 519                          | 665 | 586 |
|                 | 2019 | 19,239        | 21,211    | 40,450    | 452                          | 579 | 511 |
| Americas        | 2000 | 2,106,791     | 2,107,131 | 4,213,922 | 421                          | 594 | 497 |
|                 | 2019 | 2,861,523     | 2,957,614 | 5,819,137 | 352                          | 483 | 412 |

**HOW HAS** population growth, population aging, and epidemiological change affected the number of deaths in Saint Lucia?

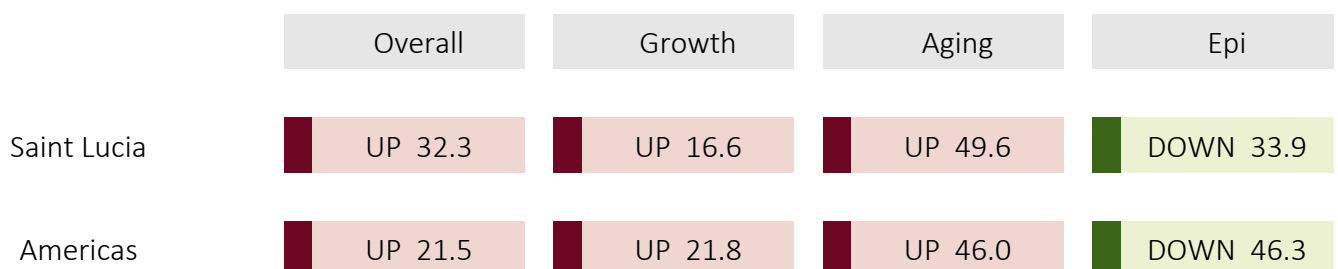

This last chart presents the percentage change in deaths between 2000 and 2019, due to population growth, population aging, and due to *epidemiological change*. This last effect is more accurately called *the change in age-specific mortality rates*, which can be ascribed to changes in the health profile of a population and national health system changes.



# Population Aging and Noncommunicable Disease in St Vincent & the Grenadines

Briefing created by Ian Hambleton.

The University of the West Indies.

Updated on: 22 Nov 2022 at 14:23:32

**WHAT IS** the size of the population and the number of older adults in St Vincent & the Grenadines?

|            |      | Women (n) |       | Men (n)  |       | All (n)  |        |
|------------|------|-----------|-------|----------|-------|----------|--------|
|            |      | All ages  | 70+   | All ages | 70+   | All ages | 70+    |
| Population | 2000 | 53,487    | 2,886 | 54,300   | 2,120 | 107,787  | 5,006  |
|            | 2020 | 54,729    | 3,665 | 56,218   | 3,444 | 110,947  | 7,109  |
|            | 2040 | 56,718    | 6,892 | 55,769   | 5,910 | 112,487  | 12,802 |
|            | 2060 | 53,028    | 9,165 | 50,854   | 7,046 | 103,882  | 16,211 |

**HOW WILL** the proportion of older adults change in the future in St Vincent & the Grenadines?

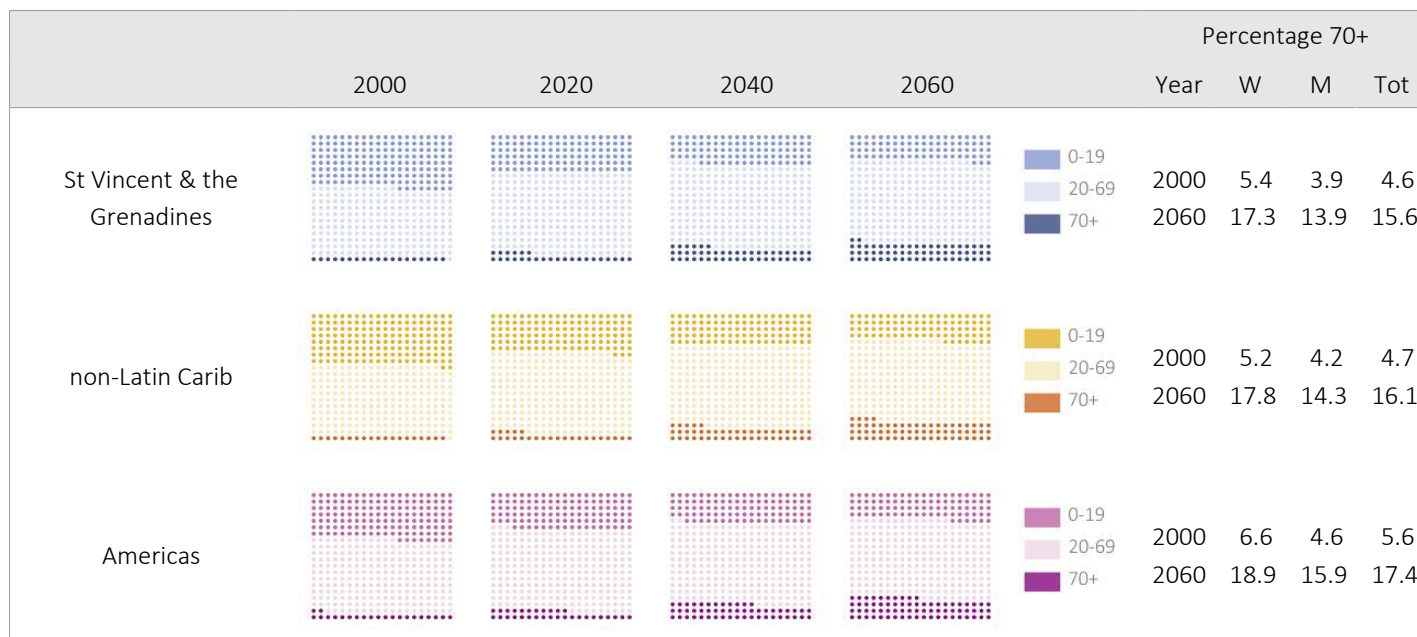

**WHAT ARE** the number of deaths and the mortality rates from noncommunicable disease in St Vincent & the Grenadines?

|                             |      | Mortality (n) |           |           | Mortality (rate per 100,000) |     |     |
|-----------------------------|------|---------------|-----------|-----------|------------------------------|-----|-----|
|                             |      | F             | M         | Tot       | F                            | M   | Tot |
| St Vincent & the Grenadines | 2000 | 314           | 291       | 605       | 640                          | 744 | 685 |
|                             | 2019 | 351           | 385       | 736       | 499                          | 575 | 537 |
| non-Latin Carib             | 2000 | 14,964        | 16,061    | 31,025    | 519                          | 665 | 586 |
|                             | 2019 | 19,239        | 21,211    | 40,450    | 452                          | 579 | 511 |
| Americas                    | 2000 | 2,106,791     | 2,107,131 | 4,213,922 | 421                          | 594 | 497 |
|                             | 2019 | 2,861,523     | 2,957,614 | 5,819,137 | 352                          | 483 | 412 |

**HOW HAS** population growth, population aging, and epidemiological change affected the number of deaths in St Vincent & the Grenadines?

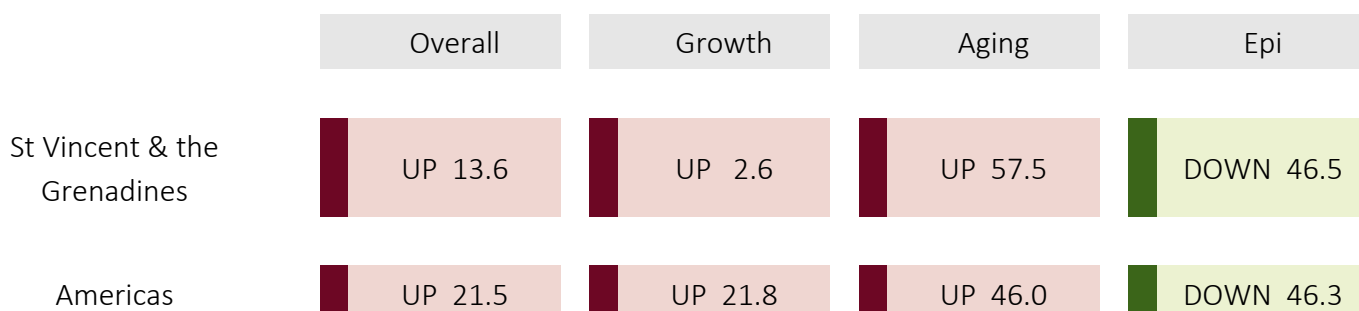

This last chart presents the percentage change in deaths between 2000 and 2019, due to population growth, population aging, and due to *epidemiological change*. This last effect is more accurately called *the change in age-specific mortality rates*, which can be ascribed to changes in the health profile of a population and national health system changes.



# Population Aging and Noncommunicable Disease in Suriname

Briefing created by Ian Hambleton.

The University of the West Indies.

Updated on: 22 Nov 2022 at 14:23:35

**WHAT IS** the size of the population and the number of older adults in Suriname?

|            |      | Women (n) |        | Men (n)  |        | All (n)  |        |
|------------|------|-----------|--------|----------|--------|----------|--------|
|            |      | All ages  | 70+    | All ages | 70+    | All ages | 70+    |
| Population | 2000 | 233,059   | 8,515  | 237,885  | 7,274  | 470,944  | 15,789 |
|            | 2020 | 291,812   | 15,893 | 294,822  | 10,641 | 586,634  | 26,534 |
|            | 2040 | 333,308   | 32,144 | 330,458  | 23,046 | 663,766  | 55,190 |
|            | 2060 | 345,791   | 46,415 | 338,639  | 32,092 | 684,430  | 78,507 |

**HOW WILL** the proportion of older adults change in the future in Suriname?

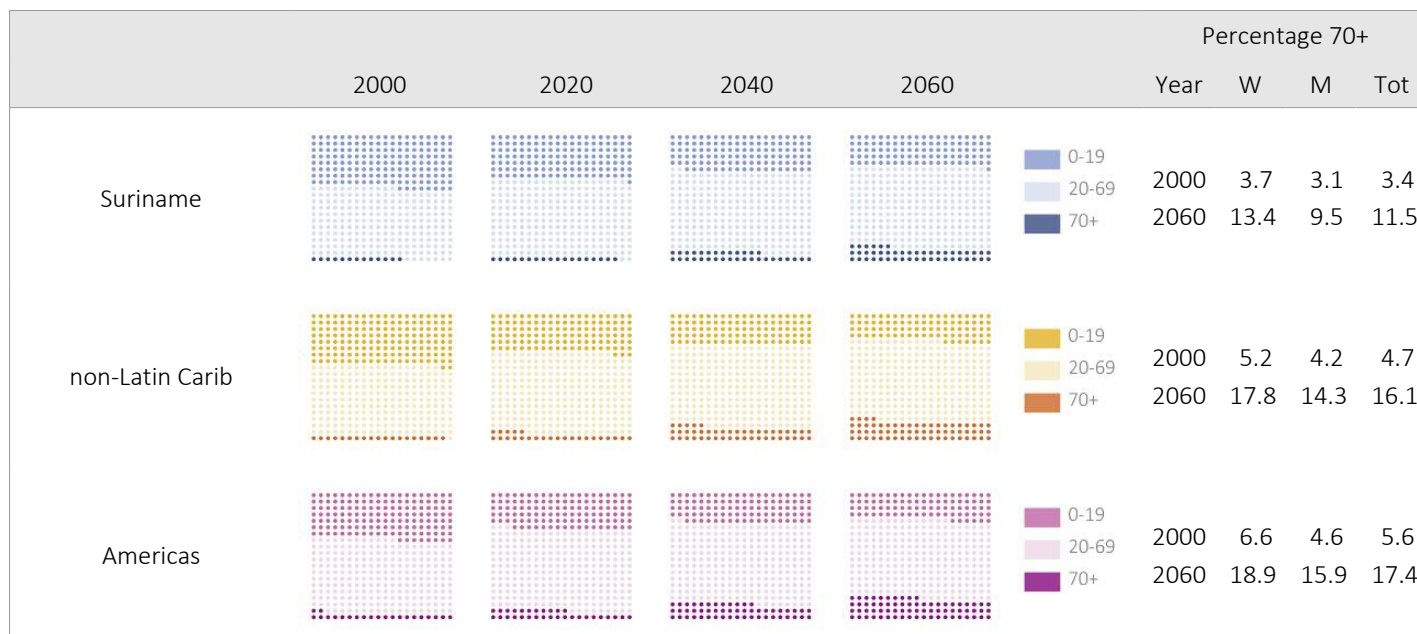

**WHAT ARE** the number of deaths and the mortality rates from noncommunicable disease in Suriname?

|                 |      | Mortality (n) |           |           | Mortality (rate per 100,000) |     |     |
|-----------------|------|---------------|-----------|-----------|------------------------------|-----|-----|
|                 |      | F             | M         | Tot       | F                            | M   | Tot |
| Suriname        | 2000 | 891           | 1,072     | 1,963     | 523                          | 720 | 614 |
|                 | 2019 | 1,642         | 1,887     | 3,529     | 547                          | 822 | 666 |
| non-Latin Carib | 2000 | 14,964        | 16,061    | 31,025    | 519                          | 665 | 586 |
|                 | 2019 | 19,239        | 21,211    | 40,450    | 452                          | 579 | 511 |
| Americas        | 2000 | 2,106,791     | 2,107,131 | 4,213,922 | 421                          | 594 | 497 |
|                 | 2019 | 2,861,523     | 2,957,614 | 5,819,137 | 352                          | 483 | 412 |

**HOW HAS** population growth, population aging, and epidemiological change affected the number of deaths in Suriname?

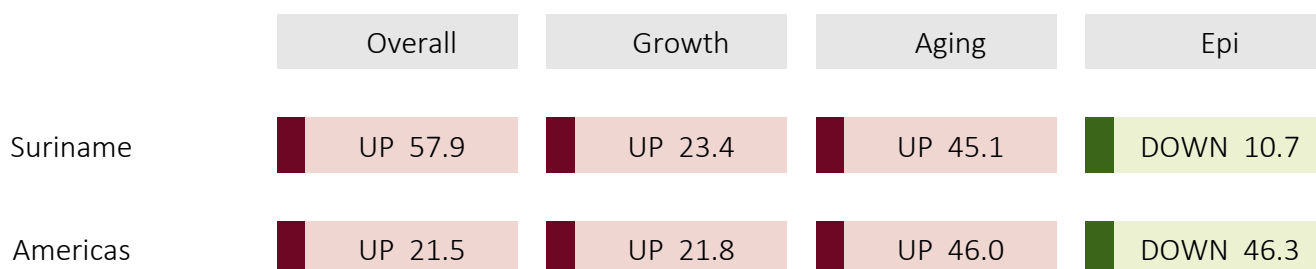

This last chart presents the percentage change in deaths between 2000 and 2019, due to population growth, population aging, and due to *epidemiological change*. This last effect is more accurately called *the change in age-specific mortality rates*, which can be ascribed to changes in the health profile of a population and national health system changes.

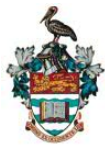

# Population Aging and Noncommunicable Disease in Trinidad & Tobago

Briefing created by Ian Hambleton.

The University of the West Indies.

Updated on: 22 Nov 2022 at 14:23:37

**WHAT IS** the size of the population and the number of older adults in Trinidad & Tobago?

|            |      | Women (n) |         | Men (n)  |         | All (n)   |         |
|------------|------|-----------|---------|----------|---------|-----------|---------|
|            |      | All ages  | 70+     | All ages | 70+     | All ages  | 70+     |
| Population | 2000 | 636,416   | 31,366  | 630,743  | 21,909  | 1,267,159 | 53,275  |
|            | 2020 | 708,544   | 57,175  | 690,947  | 43,795  | 1,399,491 | 100,970 |
|            | 2040 | 711,634   | 105,502 | 680,310  | 79,670  | 1,391,944 | 185,172 |
|            | 2060 | 653,601   | 144,849 | 619,456  | 110,147 | 1,273,057 | 254,996 |

**HOW WILL** the proportion of older adults change in the future in Trinidad & Tobago?

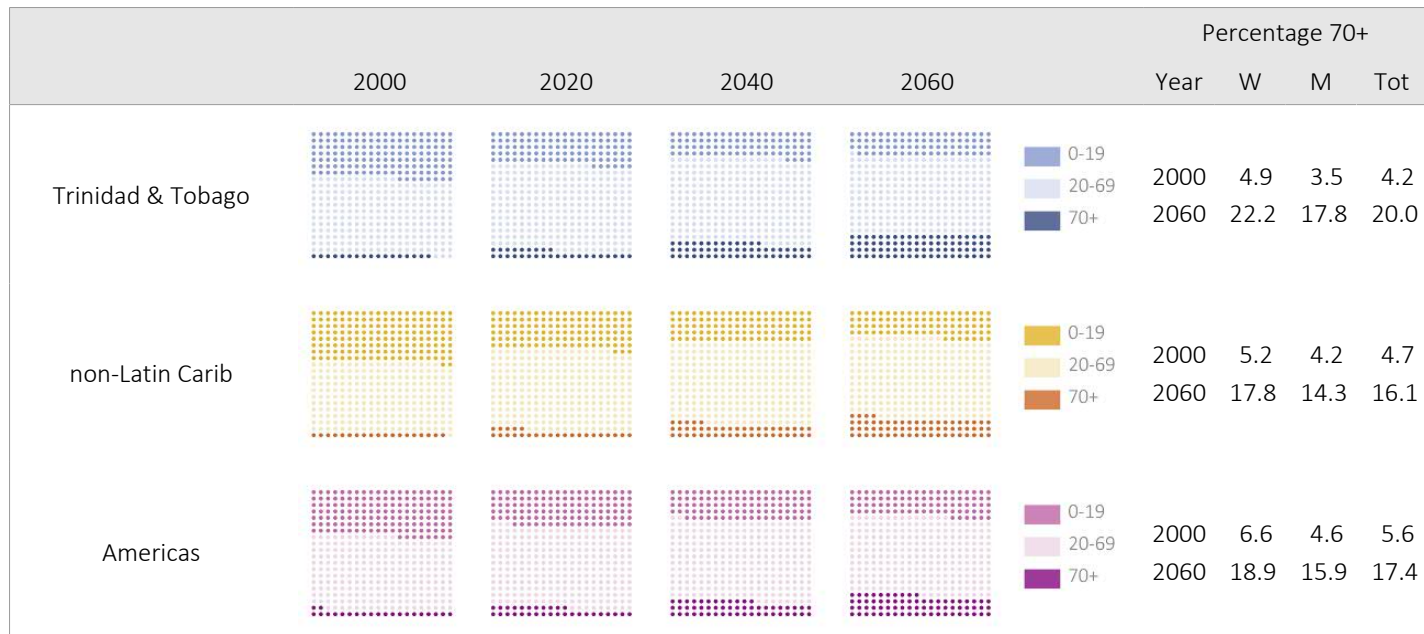

**WHAT ARE** the number of deaths and the mortality rates from noncommunicable disease in Trinidad & Tobago?

|                   |      | Mortality (n) |           |           | Mortality (rate per 100,000) |     |     |
|-------------------|------|---------------|-----------|-----------|------------------------------|-----|-----|
|                   |      | F             | M         | Tot       | F                            | M   | Tot |
| Trinidad & Tobago | 2000 | 3,569         | 4,014     | 7,583     | 620                          | 881 | 732 |
|                   | 2019 | 3,440         | 4,363     | 7,803     | 352                          | 553 | 439 |
| non-Latin Carib   | 2000 | 14,964        | 16,061    | 31,025    | 519                          | 665 | 586 |
|                   | 2019 | 19,239        | 21,211    | 40,450    | 452                          | 579 | 511 |
| Americas          | 2000 | 2,106,791     | 2,107,131 | 4,213,922 | 421                          | 594 | 497 |
|                   | 2019 | 2,861,523     | 2,957,614 | 5,819,137 | 352                          | 483 | 412 |

**HOW HAS** population growth, population aging, and epidemiological change affected the number of deaths in Trinidad & Tobago?

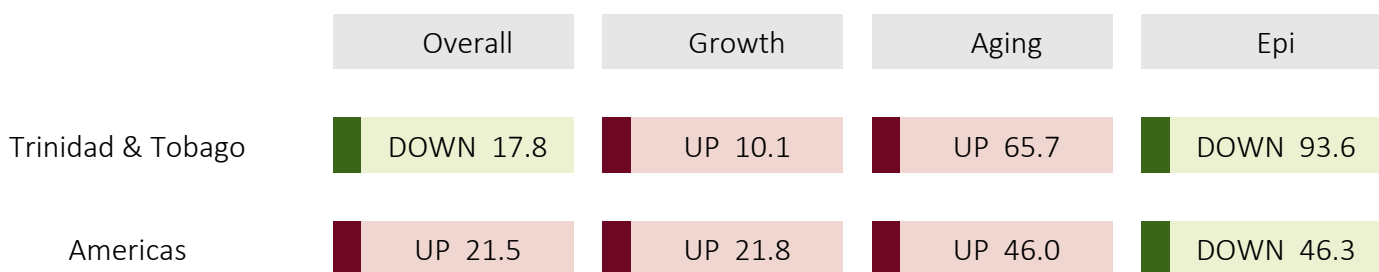

This last chart presents the percentage change in deaths between 2000 and 2019, due to population growth, population aging, and due to *epidemiological change*. This last effect is more accurately called *the change in age-specific mortality rates*, which can be ascribed to changes in the health profile of a population and national health system changes.



# Population Aging and Noncommunicable Disease in United States

Briefing created by Ian Hambleton.

The University of the West Indies.

Updated on: 22 Nov 2022 at 14:23:40

**WHAT IS** the size of the population and the number of older adults in United States?

|            |      | Women (n)   |            | Men (n)     |            | All (n)     |            |
|------------|------|-------------|------------|-------------|------------|-------------|------------|
|            |      | All ages    | 70+        | All ages    | 70+        | All ages    | 70+        |
| Population | 2000 | 142,949,312 | 15,283,177 | 138,761,568 | 10,012,437 | 281,710,912 | 25,295,616 |
|            | 2020 | 167,216,640 | 21,010,064 | 163,786,016 | 16,219,713 | 331,002,624 | 37,229,780 |
|            | 2040 | 184,964,880 | 33,553,980 | 181,607,248 | 27,919,446 | 366,572,192 | 61,473,424 |
|            | 2060 | 196,296,768 | 38,018,448 | 195,198,160 | 33,725,636 | 391,494,944 | 71,744,096 |

**HOW WILL** the proportion of older adults change in the future in United States?

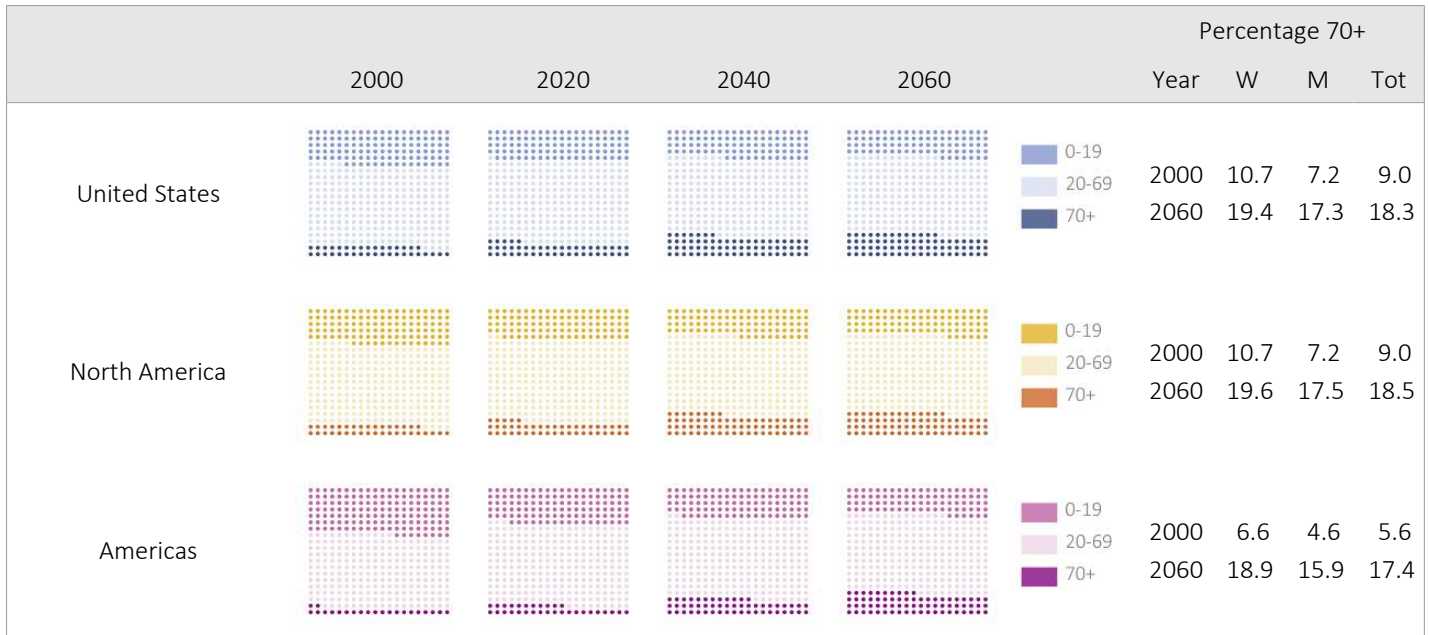

**WHAT ARE** the number of deaths and the mortality rates from noncommunicable disease in United States?

|               |      | Mortality (n) |           |           | Mortality (rate per 100,000) |     |     |
|---------------|------|---------------|-----------|-----------|------------------------------|-----|-----|
|               |      | F             | M         | Tot       | F                            | M   | Tot |
| United States | 2000 | 1,104,367     | 1,007,970 | 2,112,337 | 405                          | 581 | 482 |
|               | 2019 | 1,298,631     | 1,300,953 | 2,599,584 | 349                          | 476 | 408 |
| North America | 2000 | 1,201,371     | 1,106,712 | 2,308,083 | 398                          | 574 | 475 |
|               | 2019 | 1,422,112     | 1,427,303 | 2,849,414 | 338                          | 462 | 397 |
| Americas      | 2000 | 2,106,791     | 2,107,131 | 4,213,922 | 421                          | 594 | 497 |
|               | 2019 | 2,861,523     | 2,957,614 | 5,819,137 | 352                          | 483 | 412 |

**HOW HAS** population growth, population aging, and epidemiological change affected the number of deaths in United States?

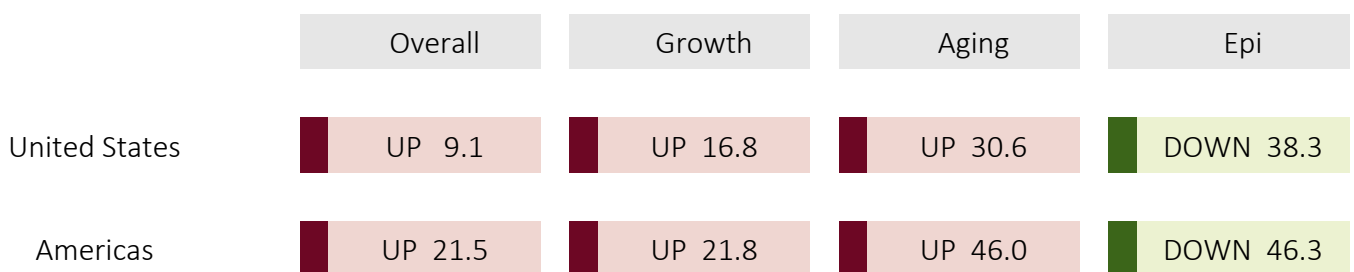

This last chart presents the percentage change in deaths between 2000 and 2019, due to population growth, population aging, and due to *epidemiological change*. This last effect is more accurately called *the change in age-specific mortality rates*, which can be ascribed to changes in the health profile of a population and national health system changes.



# Population Aging and Noncommunicable Disease in Uruguay

Briefing created by Ian Hambleton.

The University of the West Indies.

Updated on: 22 Nov 2022 at 14:23:43

**WHAT IS** the size of the population and the number of older adults in Uruguay?

|            |      | Women (n) |         | Men (n)   |         | All (n)   |         |
|------------|------|-----------|---------|-----------|---------|-----------|---------|
|            |      | All ages  | 70+     | All ages  | 70+     | All ages  | 70+     |
| Population | 2000 | 1,713,076 | 184,812 | 1,606,658 | 112,855 | 3,319,734 | 297,667 |
|            | 2020 | 1,795,391 | 238,276 | 1,678,336 | 136,728 | 3,473,727 | 375,004 |
|            | 2040 | 1,856,651 | 308,352 | 1,767,818 | 200,812 | 3,624,469 | 509,164 |
|            | 2060 | 1,834,644 | 380,092 | 1,777,996 | 283,498 | 3,612,640 | 663,590 |

**HOW WILL** the proportion of older adults change in the future in Uruguay?

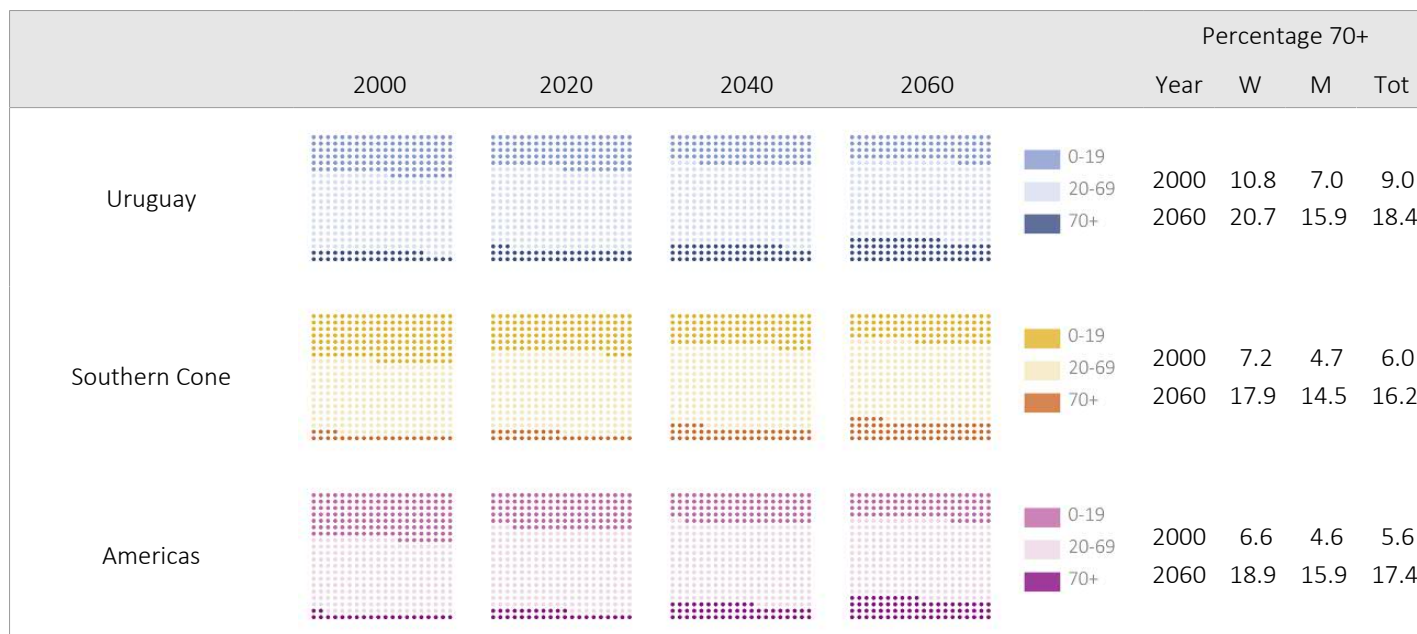

**WHAT ARE** the number of deaths and the mortality rates from noncommunicable disease in Uruguay?

|               |      | Mortality (n) |           |           | Mortality (rate per 100,000) |     |     |
|---------------|------|---------------|-----------|-----------|------------------------------|-----|-----|
|               |      | F             | M         | Tot       | F                            | M   | Tot |
| Uruguay       | 2000 | 12,450        | 13,604    | 26,054    | 400                          | 706 | 528 |
|               | 2019 | 15,276        | 14,487    | 29,763    | 348                          | 592 | 446 |
| Southern Cone | 2000 | 153,834       | 171,601   | 325,435   | 402                          | 668 | 514 |
|               | 2019 | 205,567       | 210,855   | 416,422   | 328                          | 515 | 408 |
| Americas      | 2000 | 2,106,791     | 2,107,131 | 4,213,922 | 421                          | 594 | 497 |
|               | 2019 | 2,861,523     | 2,957,614 | 5,819,137 | 352                          | 483 | 412 |

**HOW HAS** population growth, population aging, and epidemiological change affected the number of deaths in Uruguay?

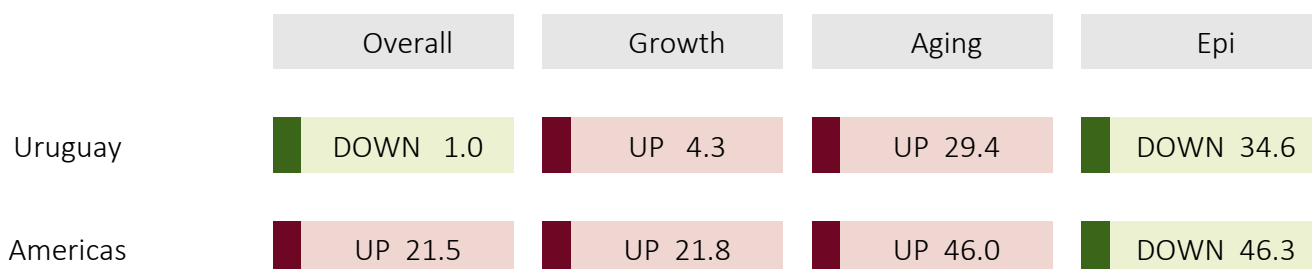

This last chart presents the percentage change in deaths between 2000 and 2019, due to population growth, population aging, and due to *epidemiological change*. This last effect is more accurately called *the change in age-specific mortality rates*, which can be ascribed to changes in the health profile of a population and national health system changes.





# Population Aging and Noncommunicable Disease in Venezuela

Briefing created by Ian Hambleton.

The University of the West Indies.

Updated on: 22 Nov 2022 at 14:23:46

**WHAT IS** the size of the population and the number of older adults in Venezuela?

|            |      | Women (n)  |           | Men (n)    |           | All (n)    |           |
|------------|------|------------|-----------|------------|-----------|------------|-----------|
|            |      | All ages   | 70+       | All ages   | 70+       | All ages   | 70+       |
| Population | 2000 | 12,052,838 | 378,418   | 12,139,611 | 291,856   | 24,192,448 | 670,274   |
|            | 2020 | 14,451,011 | 805,427   | 13,984,932 | 596,577   | 28,435,942 | 1,402,004 |
|            | 2040 | 18,252,904 | 1,769,176 | 17,566,432 | 1,288,000 | 35,819,324 | 3,057,176 |
|            | 2060 | 19,210,186 | 2,839,584 | 18,327,356 | 2,020,129 | 37,537,544 | 4,859,713 |

**HOW WILL** the proportion of older adults change in the future in Venezuela?

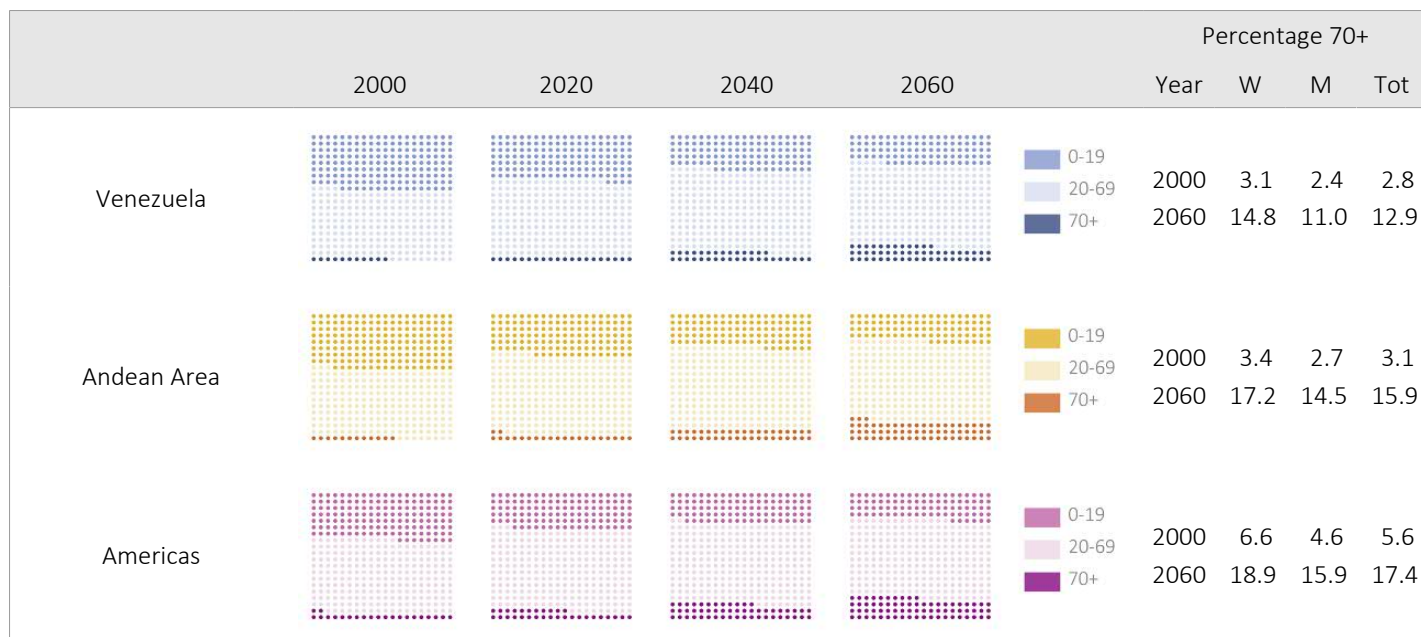

**WHAT ARE** the number of deaths and the mortality rates from noncommunicable disease in Venezuela?

|             |      | Mortality (n) |           |           | Mortality (rate per 100,000) |     |     |
|-------------|------|---------------|-----------|-----------|------------------------------|-----|-----|
|             |      | F             | M         | Tot       | F                            | M   | Tot |
| Venezuela   | 2000 | 31,283        | 36,529    | 67,812    | 395                          | 559 | 469 |
|             | 2019 | 54,245        | 57,713    | 111,958   | 351                          | 490 | 412 |
| Andean Area | 2000 | 157,087       | 156,463   | 313,550   | 403                          | 486 | 440 |
|             | 2019 | 260,586       | 259,302   | 519,889   | 326                          | 404 | 361 |
| Americas    | 2000 | 2,106,791     | 2,107,131 | 4,213,922 | 421                          | 594 | 497 |
|             | 2019 | 2,861,523     | 2,957,614 | 5,819,137 | 352                          | 483 | 412 |

**HOW HAS** population growth, population aging, and epidemiological change affected the number of deaths in Venezuela?

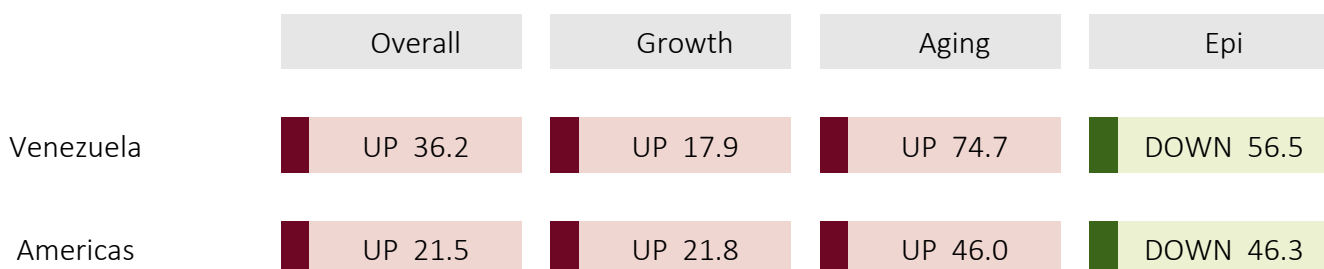

This last chart presents the percentage change in deaths between 2000 and 2019, due to population growth, population aging, and due to *epidemiological change*. This last effect is more accurately called *the change in age-specific mortality rates*, which can be ascribed to changes in the health profile of a population and national health system changes.
